# Supplementary material for: Dynamics of macrophage polarization support Salmonella persistence in a whole living organism
Source: eLife. 2024 Jan 15;13:e89828. doi: 10.7554/eLife.89828 (PMC10830131; doi:10.7554/eLife.89828)
Supplement: Figure 7—source data 1. — This excel file contains analyzed data from sequencing experiments shown in Figure 7: (1) List of all the differentially expressed genes upon Salmonella infection at 4 hpi (p-adj <0.05). (2) List of all the differentially expressed genes upon Salmonella infection at 4 dpi (p-adj <0.05). (3) Lists of either unique and intersecting up-regulated (Up) or down-regulated (Down) genes upon Salmonella infection at 4 hpi and 4 dpi (p-adj <0.05|(Log2(FC) ≥1 or ≤1)). (4) List of enriched KEGG pathways upon up-regulated genes at 4 hpi (p-adj <0.05|(Log2(FC) ≥1)). (5) List of enriched KEGG pathways upon all differentially expressed genes at 4 dpi (p-adj <0.05). (6) List of enriched GOterms upon up-regulated genes at 4 hpi (p-adj <0.05|(Log2(FC) ≥1)). (7) List of enriched GOterms upon up-regulated genes at 4 dpi (p-adj <0.05|(Log2(FC) ≥0.1)). [file elife-89828-fig7-data1.xlsx]

## Sheet: INF_4hpi_vs_NonINF_4hpi
List of all the differentially expressed genes upon Salmonella infection at 4 hpi (p-adj < 0.05)
Gene ID	Gene name	baseMean	log2FoldChange	p-adj
323919	alcamb	3278.23672991886	6.73359	1.65441643902223e-189
553228	LOC553228	127327.478854224	6.23734	2.40182382020009e-173
561123	fam222ba	1571.52579784406	3.96815	5.88990758072293e-170
100302404	f8	4368.24730022982	6.35849	1.50183885149866e-166
100000775	glula	56283.0384162227	-6.69161	2.65889781443123e-129
436731	dgat1b	3320.63034864773	3.63297	5.78893744395982e-127
568634	pglyrp2	2194.81683154752	8.57295	7.55715572526038e-123
405801	rbm24a	4167.26179529381	6.61278	1.87108663688192e-119
406767	sh3bp5b	5832.7024083856	6.43325	2.54747665902708e-117
110437729	LOC110437729	678.595378718591	5.7229	8.05023437734484e-117
798892	cxcl11.1	6856.51950726338	6.88878	2.09613501541754e-113
407716	st6galnac5b	1871.46454082314	7.61033	3.66727560273534e-112
777792	sult2st3	17660.7727224683	6.55511	1.32703834984136e-110
360145	mxc	24017.4730398255	7.02149	1.04398835576155e-108
81880	anxa13	677.659534282289	4.37673	1.61881103721997e-108
563836	zgc:171566	3793.44661709735	6.3638	2.76490479305131e-107
569827	ubash3bb	5265.96587925461	3.57474	1.8635684159881e-106
327462	hsd3b7	1377.00810536242	4.94634	1.88414436365809e-106
334167	mknk2a	2419.91676525568	5.10391	5.05801220879094e-106
794716	dixdc1b	1655.64892058397	5.93092	1.66103911088898e-105
100535673	si:ch211-198c19.3	14460.0021694413	6.4824	5.13273715570916e-96
492794	arhgap28	601.770931081178	5.96495	2.04666698614727e-94
541514	hhla2a.1	9542.98588692268	5.10024	5.71582706267344e-93
557185	slc25a35	2738.92354810912	3.45917	2.45518222186978e-89
393682	lin7a	518.75035063418	4.75926	8.17824539960476e-88
550429	steap4	18938.9846263313	9.23715	2.96749984651568e-87
100003142	rpz5	24069.0521228488	2.87179	1.5730562927529e-85
569561	arhgef25b	3257.29375318363	8.95613	1.65207439837762e-85
550242	nadka	11418.8530654826	3.8391	2.04682214318969e-84
407664	hbegfb	11197.5939819697	3.91832	3.03258332863554e-84
100330213	si:ch211-258f14.2	2018.12645101095	7.56566	7.37088223047033e-84
325004	sdcbp2	26708.9556790889	2.86629	2.14536108399285e-83
100150939	nes	1060.71551235107	5.56574	2.0955013922273e-82
436669	tmem178b	737.285228632628	5.47229	4.21477087178524e-80
566499	slc16a10	16426.1115165323	-4.09038	4.21477087178524e-80
566739	fes	8490.02276788071	4.51595	2.32315346744621e-79
57987	adgrl2a	702.877578575166	5.48074	3.91843689772146e-79
110438075	LOC110438075	18264.1608254647	4.89098	2.71623922871329e-78
619262	ston2	1687.59013638668	-3.8809	6.84099791292514e-77
678622	tnfrsf9a	470.421816588733	6.56112	1.35732914407847e-76
100329385	egln1a	351.418205278254	-4.39245	1.98162963727306e-76
798260	si:dkey-40c11.2	3497.71445705459	7.31862	3.10049470535449e-75
556314	ttyh3a	4982.29574610984	-3.00422	3.05687500259416e-73
100005110	c1ql2	8599.481693048	6.49126	1.07304837680074e-71
553957	il10	2147.31045744197	5.24914	2.71271437992585e-71
327483	si:zfos-943e10.1	7425.78310225799	2.97417	4.3859028651486e-68
550581	sar1ab	879.598004062044	3.51279	1.71974109014573e-67
795086	si:dkey-33c9.6	5215.53442384709	3.76118	7.69771517477737e-67
796377	sema4e	9067.19841836616	7.66146	1.04782267557283e-65
768144	afap1l1b	9018.79619865194	4.01856	1.15460010913168e-65
100884152	dicp2.2	824.691748879283	9.1577	1.70542765451277e-64
553403	kctd12.2	1068.22478613792	-5.88913	8.86816913728141e-64
550580	sqrdl	2052.59608722939	-2.00052	1.04325677814545e-63
321033	aif1l	15748.6897532054	4.59102	4.21414013994782e-63
100004180	LOC100004180	1271.09032108683	3.72795	9.75176697715073e-63
100002266	LOC100002266	1698.9447497858	4.08215	7.32986201618032e-62
100330730	spata22	651.053226724449	3.47575	1.41488747132476e-61
436763	ttyh2	1679.22288275882	6.8933	7.45181866365166e-61
494490	slc6a9	8895.44722162825	4.97541	1.53833622010548e-60
406299	sucla2	53340.7321659368	2.6819	2.89919987225703e-60
393336	zgc:64022	589.554800109983	7.53286	1.45286044877628e-58
103910140	LOC103910140	3778.54780664055	8.01038	4.8628853535852e-58
556591	prkchb	1428.95774567231	6.99046	1.41248434633134e-57
101883564	si:dkey-216e24.9	464.3528123077	-8.33596	1.76336773547709e-57
101886404	LOC101886404	2879.32358503642	5.87176	2.51245827119216e-57
402995	pus7	1650.19535272899	-2.40501	3.13431634602597e-57
797780	ssuh2.3	6931.1530207921	5.99573	5.03605884096377e-57
30591	hsp90aa1.1	1146.25622953047	3.86411	7.42607113152868e-57
449958	tnip1	21487.9786573081	4.27123	8.56840104137089e-57
503764	zgc:112964	845.85190566905	6.65583	1.62937813308422e-56
572027	ppat	862.97198478548	-3.08293	1.64634722270117e-56
402865	si:dkey-4e7.3	468.030366881566	-2.70768	2.49537683639877e-56
368917	adam8a	56717.7078239499	5.44219	1.86815819246885e-55
557792	dennd3b	385.255347393313	5.68213	1.15420853030649e-54
393226	slc25a32a	3177.94399376826	-3.50056	1.31095778002782e-54
436637	mob2a	494.37428762028	3.97022	1.73048644385927e-54
100537553	LOC100537553	728.163118780898	-7.43545	1.83282162458464e-54
573110	cbx4	428.039882205767	2.76536	1.41792866182883e-53
563556	itgb5	621.77905150545	-3.39231	3.34607265185395e-53
337166	si:dkey-40g16.6	1169.36993096683	8.80525	4.13941153948298e-53
393606	kcnk5b	324.945092610424	-3.90187	1.28429470214273e-52
562344	hs3st1l2	596.500897608901	6.06683	4.2997594820024e-52
447838	coasy	440.131534412293	-2.87458	7.19988451812435e-52
562473	ncf2	21736.1632962946	2.94044	2.96351516237751e-51
561280	zfp36l1a	28950.6086832002	-3.58321	8.16324368456248e-51
793825	igflr1	8471.34174953025	5.76856	1.55280866530175e-50
558721	LOC558721	17980.7654072409	6.96937	2.74885771206091e-50
567144	slc16a4	776.360084159332	7.51879	6.83049306715567e-50
796404	plekhg5b	7912.97568023394	3.70404	8.24838351217513e-50
402871	gstcd	286.345274111815	-3.57946	1.04603494244055e-49
334438	si:ch1073-138d10.2	240.522313690863	7.42637	1.14464257203904e-49
101884755	LOC101884755	66309.8797738042	3.81691	1.25411611588224e-49
554119	mlx	13120.1992251728	2.95192	1.27157507517161e-49
100333627	gas7b	5590.54835944648	5.28409	1.45941595082106e-49
100537295	si:dkey-33c14.3	790.849567518859	6.72198	2.592492068316e-49
574423	rab24	3535.47659179138	3.68537	4.22475885485011e-49
402822	gcat	10107.1997627471	2.85153	5.57918550037557e-49
58003	evla	2771.6110434172	-4.13786	1.23776401234177e-48
557055	pou2f2a	2044.03706008934	5.29522	3.0580110034054e-48
561067	mxf	119443.055222749	7.06506	3.82638029662917e-48
100334698	reck	872.675197386955	-3.28836	5.27568314047702e-48
561583	pcnxl2	505.003762788058	6.63791	6.80388958236956e-48
560966	si:ch211-158d24.4	1422.01522478555	-4.95758	7.43908093527778e-48
567537	cxcl20	634.212568557885	4.21947	9.09229871452841e-48
100537452	LOC100537452	18121.3839575957	3.28206	9.76317811657323e-48
793635	b4galnt1b	274.105734837807	6.75486	9.80018614714061e-48
326287	epb41b	1025.62402124855	4.86376	1.22833257056365e-47
541345	zgc:110340	1923.04956855109	-4.41982	1.99025202806221e-47
564048	plekhm1	1959.81692531224	4.28451	4.52387784366898e-47
559428	ddr2b	422.233223981828	6.96507	4.56086674046516e-47
100007937	si:ch211-284o19.8	136553.277325769	5.04236	6.37172951135457e-47
449552	fkbp1ab	575.862056117839	4.90214	7.18018621508992e-47
569040	plcd3a	698.213838207256	4.40907	7.58084703971121e-47
321023	nnr	409.132243936785	9.17134	1.0815488855663e-46
436892	nup37	1464.64470941987	-3.1726	1.25740445299089e-46
567105	taf1a	2408.95256719233	2.73044	1.64103315111911e-46
394136	sept7a	11637.7775356983	2.04794	1.65198395907215e-46
751652	zgc:153184	2046.97912004939	-3.26533	1.93811534803438e-46
393807	ppp1r3cb	1638.9555362063	2.89599	6.75750997985944e-46
100535838	LOC100535838	1358.85806071139	5.14976	1.14194055673638e-45
557065	pxk	6925.99482485132	3.11752	1.28326599728617e-45
797436	LOC797436	1098.58529339445	5.96505	1.36412078516414e-45
445073	socs1a	1187.48637166834	6.00011	1.40251561905252e-45
407653	prim2	924.082802238645	-2.71943	1.55761777984663e-45
100038769	zgc:162182	538.359309132476	2.74021	3.58884929625384e-45
449557	saa	3810.16283744444	8.15879	1.18037710055456e-44
30741	ctnna1	4836.206504588	3.43426	1.58713177570349e-44
566336	ldah	1788.83870218456	4.38892	1.71712979655046e-44
799954	ddah2	2575.20213585528	2.23465	3.05403137234478e-44
797433	krt8	1319.63643978656	-2.02306	5.73549286698861e-44
541515	myo1b	3092.02216967866	3.95228	9.30434849899588e-44
394012	itga9	1077.74823996184	8.39757	9.30434849899588e-44
100149048	si:zfos-80g12.1	3833.66571531636	2.70364	1.33750573020425e-43
798998	gp1bb	771.398234323575	3.56972	1.48693114826384e-43
100538309	si:dkey-166d12.2	3565.16431885109	3.97259	1.92919427565727e-43
445166	ctu2	504.593640511399	-2.18454	6.0800110947715e-43
100009663	atg9a	1773.03121303921	3.32448	7.37704216852842e-43
402837	hamp	49334.2816296171	4.77352	7.37704216852842e-43
541371	en1b	552.089652051559	4.31593	1.49546482135495e-42
368478	wdr75	4194.81944878528	-3.0753	2.04849276485808e-42
406287	slc37a2	18205.3482087812	-2.54363	2.91284331927648e-42
30120	dlc	314.955371948421	5.19077	2.96809182310214e-42
100330176	chadlb	426.249619928712	8.80611	5.34257310290607e-42
353363	anxa6	211.026797682104	6.06636	6.84396198078328e-42
406528	tdh	72268.90444724	2.71256	1.16807433399068e-41
561943	neurl1aa	2876.62011767429	5.02824	1.21904709975081e-41
101882466	LOC101882466	1153.42619937133	-4.72126	2.49394805387793e-41
286747	mcm5	6301.23027212416	-2.40274	2.97347295058178e-41
449652	tmem56b	2444.75041169281	-3.14507	4.61508678649478e-41
100000492	mafaa	4432.5077950772	-6.09455	7.48026453386551e-41
791210	ugt5b4	1186.38354758718	-4.0093	1.3513249091908e-40
641321	snap23.2	4320.99968037584	3.10484	1.5739727186776e-40
402983	tcea3	347.723150554965	-4.34446	1.83620895825944e-40
335288	gpr34a	2396.10718377055	-5.90246	1.87481209493595e-40
100536572	LOC100536572	464.402472299697	6.03238	2.56295653954533e-40
554810	cd22	25925.1199163719	3.5372	3.30464540832352e-40
79375	foxc1b	452.820219286563	4.17732	6.17565880239054e-40
406364	elmo1	17748.8103930164	-1.79139	8.16802090951043e-40
571368	crfb17	10113.3525320505	4.04914	8.36725210651816e-40
562659	si:ch211-197h24.9	369.634229904125	-4.00555	9.67966475017754e-40
57925	cdc25b	7711.75341563735	-2.62871	2.61014518793186e-39
324256	orc6	834.919017988388	-2.80368	4.27313220544271e-39
735291	hspa12b	908.264348404748	-3.5961	4.28609124257703e-39
678538	crp4	2127.24255267457	-3.16678	8.07321508590904e-39
415184	msrb3	1950.46560089094	3.12786	1.04734517038493e-38
406285	chaf1b	1274.70131363656	-2.73596	1.22741395879944e-38
403051	pygb	25249.7611996347	3.57642	1.28228452272438e-38
100000923	si:dkey-11p10.10	4915.47985090092	2.52434	1.44322286995001e-38
565106	capn1b	231.989958146507	6.86594	1.49551628688816e-38
405810	ehd1a	25565.4109629197	3.03746	1.61593964425228e-38
554708	zgc:113176	13643.1536515812	4.58772	1.65631754668686e-38
101884429	LOC101884429	284.799159130552	4.92074	2.71835175176091e-38
445108	htra3a	232.411406201754	7.72639	4.08734567176247e-38
30678	pcna	17164.5464397405	-2.69856	4.1308698704857e-38
564424	soat1	2045.68225514702	4.19907	6.56601168038297e-38
619272	zgc:113314	4207.84142868013	3.21215	6.87596836651124e-38
338313	mcamb	4233.2475323071	-4.32561	8.32660541458998e-38
103909128	LOC103909128	288.936325275617	3.57278	1.07743605999045e-37
564960	gata1b	891.238550079021	5.04209	1.18062862376553e-37
394045	lmcd1	2269.18889854287	-3.93599	1.59736354122147e-37
437006	nxph1	246.901669293699	4.02255	2.1278496804119e-37
571584	marco	42982.5011805169	1.65063	4.53522694419733e-37
324900	txndc12	24353.7536608691	2.60735	4.85270955231414e-37
30291	cdh2	1688.33809042018	3.68775	4.92005799044639e-37
100004850	aatka	1037.03025829788	-4.60508	5.02319855860052e-37
560951	xylt1	578.272536918406	5.15861	6.21396485096143e-37
571743	oafb	700.173612182786	2.28437	8.84488715596922e-37
562569	plcd3b	921.71415546526	7.85181	1.13144992017763e-36
393221	slc43a2a	9377.53684360239	-3.78619	1.15560541656817e-36
393297	zgc:56585	559.538634571198	4.57629	1.15560541656817e-36
792470	ccdc153	203.077725328173	4.78228	1.24432599940801e-36
794066	si:dkey-195m11.11	37830.0909636279	5.74639	1.372903095397e-36
556642	trub1	455.552213052623	-2.92696	1.98089312676827e-36
192314	dtl	399.775876248467	-3.27435	2.16007000459613e-36
321502	krt96	742.524510875811	4.79825	2.34804410996555e-36
321177	si:ch211-153b23.5	1758.35323842073	4.72123	2.47270647288359e-36
108182577	LOC108182577	1337.76980489807	6.83983	2.91544610889106e-36
560083	si:dkey-182g1.4	5523.42228527865	2.31363	3.20954257441391e-36
768151	dennd2da	1394.12217419222	-3.04338	3.4273684613949e-36
799432	esama	194.771370126982	6.87089	3.8636828922182e-36
100332583	LOC100332583	409.832013678345	-4.73182	4.31901114740967e-36
557634	si:ch211-147k10.5	452.5162735259	6.49547	4.94682433497273e-36
393608	ptger2a	850.263398063764	4.56413	8.88802143072156e-36
562822	bmpr2a	252.532781053905	4.2974	8.94049299701223e-36
100137122	zgc:172065	124.951098635143	5.85286	1.04012908710961e-35
406596	socs3b	19933.9831375603	2.82323	1.14727157038516e-35
792472	zgc:158446	5927.31556704553	3.99522	1.66274037929771e-35
100333117	si:cabz01101003.1	6664.894024935	2.93264	1.95366174286332e-35
565656	bcl3	7827.40215051477	5.02113	2.54094414144829e-35
447858	dirc2	14850.7889630496	3.28049	2.7360025340454e-35
103911370	LOC103911370	14989.3346554706	5.39934	3.81683159200852e-35
566752	si:dkey-102g19.3	12841.0949606705	2.76515	5.08296952400493e-35
792824	pgp	8234.0296790102	2.79704	5.12089393956309e-35
100151195	mhc1lia	771.321141734686	-4.06762	6.28351474939369e-35
797571	LOC797571	384825.910633619	3.07415	7.54987909358908e-35
100332407	si:ch73-173p19.1	1937.94995589092	3.81942	8.04110960557397e-35
323529	hnrnpa0a	6325.55956429387	2.10716	1.09801616294585e-34
100884137	dicp2.1	874.963569387178	4.10154	1.1775390546422e-34
796425	card9	2277.18496239572	2.44485	1.93999498781508e-34
555436	cep85l	2489.65238179147	2.53396	2.35725862141032e-34
492482	eif4ebp3	497.392059073234	-3.62042	2.47397866716993e-34
335994	il12bb	205.199034188631	5.68067	2.47397866716993e-34
100334805	ccdc129	713.169377782544	-3.32518	2.50387201441775e-34
402847	cyp2x7	788.279427962779	4.27808	5.11112029376188e-34
100006233	arhgap23a	1112.29515441808	3.21096	5.62669315019893e-34
101886351	ly86	243.03493152535	4.05366	6.23290968567193e-34
100332549	znhit6	484.284389857499	-2.36728	6.45288410285137e-34
641577	reep3a	360.547720980797	-3.40582	6.80858065627733e-34
568080	stk35	1678.29576340298	-2.03416	7.05738704826818e-34
494152	nop58	13030.2029417002	-2.41722	7.39058871386877e-34
336526	b3gnt5a	5431.1978938335	2.72679	9.44311397411591e-34
564748	LOC564748	264.600498919133	3.97958	1.02556360508987e-33
102216265	sox8a	488.226663539562	3.09239	1.22747636456555e-33
100150242	si:ch211-269k10.4	1860.71073773749	-3.44076	1.34095254687731e-33
100151593	lhfpl4a	429.562081144689	5.69244	1.44351097939905e-33
393949	unga	651.903503788593	-3.7576	1.51789314330297e-33
566871	si:dkey-32e23.4	911.092021594448	2.20473	2.11328240367284e-33
557893	lipeb	1468.16448844022	2.85771	2.39721555736919e-33
553596	grapa	2073.58776338691	-3.20478	2.64006324350865e-33
797907	dnajc5ab	40065.4933208932	3.74121	3.56143934404754e-33
564097	ptchd4	149.635647439772	6.38285	4.19832447204725e-33
767718	sult5a1	10241.3939327511	4.7461	6.83612450459624e-33
798740	eda	142.030734627372	5.7303	6.95757841915379e-33
103908642	LOC103908642	216.980746402289	4.84335	7.27804488221928e-33
568857	si:ch211-194m7.8	5335.84803014075	2.80821	7.69442904181625e-33
564600	2012-09-01	3376.80552334707	-3.14282	9.01173632326862e-33
393877	derl3	631.066748998413	4.19608	9.48422254414186e-33
406339	hk2	5174.11977530016	2.65006	1.04136653727104e-32
751707	acsf2	259.645640682353	-2.72325	1.11254704284133e-32
393192	pdcd2l	701.311631156966	-2.4165	1.17369097674873e-32
492762	trip10a	1282.50039115977	-2.96102	1.31122345845675e-32
406690	nsun5	938.149863209065	-2.59343	1.80962787431644e-32
101883468	LOC101883468	213.285178855782	-6.14352	1.83395644700702e-32
404232	chst11	5586.39015061764	3.31729	2.14528330600998e-32
325037	tsr1	3360.82455670333	-2.61014	2.2502456273667e-32
192338	mcm2	8753.38143245889	-2.7562	2.2825938081685e-32
333997	ampd3b	309.063342399926	-3.6233	2.32297298811715e-32
797181	LOC797181	358.899137320698	8.30322	2.55241820336203e-32
791456	acy3.1	462.595587357889	-3.46827	3.35435469667543e-32
108183639	LOC108183639	151.064001677964	-4.01324	3.35435469667543e-32
797988	fis1	4852.83611343973	2.29127	3.41621759703848e-32
406404	ak3	959.285337364289	-3.27219	3.41621759703848e-32
550535	zgc:110182	1347.0893442543	4.46429	3.41999651641369e-32
555791	zgc:162952	387.877684895853	4.73451	3.78583946218364e-32
555316	kin	2060.76725582079	2.01838	4.03126615584659e-32
561190	atp2b1b	666.983234197016	4.52998	5.53526109788276e-32
558355	zgc:162972	528.956942805593	2.89402	7.36624877699584e-32
100332577	nop9	968.946786427286	-2.72095	7.54839268244685e-32
567145	adam11	337.767584339327	-3.84822	7.96809266905779e-32
567548	smpd2a	531.834016812807	-3.89652	8.87918341224832e-32
100537750	foxq1a	588.594965037647	5.3344	9.19784487052311e-32
101886418	si:ch211-139k8.2	197.412449946599	-3.41025	1.26356246137336e-31
557975	si:ch73-256g18.2	275.918900658018	4.86031	1.3049327299975e-31
368621	si:busm1-57f23.1	5102.63595304241	4.666	1.77440807273331e-31
554146	gins2	652.16977778536	-3.03684	2.16844006382148e-31
101885327	cd180	1297.60518030534	4.13964	2.54028160121636e-31
573996	chordc1a	958.687222610732	2.89911	2.55571804952052e-31
100329297	serinc2l	6079.25217110043	2.8938	2.94330958287202e-31
100526652	ptprr	6079.95075732739	3.09776	3.59951500925478e-31
259195	caska	1109.4854721215	3.66856	4.6868483905129e-31
100003534	gpr141	4353.84845040078	2.3019	6.27541408518431e-31
565988	plekhg2	171.00840907991	7.0475	6.58664166555858e-31
553204	crot	1306.56850074018	-3.06175	8.91575617924583e-31
386787	itga5	605.640943616011	4.4894	1.00061038826223e-30
566968	si:dkeyp-115a10.3	359.20260778216	9.5521	1.12213792868721e-30
100333928	alpk1	20036.4667864629	5.00305	1.1500635363988e-30
100334656	si:dkey-31e10.6p	5265.33949132391	5.69888	1.44752426122135e-30
101884711	si:dkey-238d18.5	555.527541668971	2.85743	1.49673481492723e-30
564874	tnfrsf21	2871.4989812062	-4.92933	1.77117568749923e-30
494099	ephx2	22005.7682534351	2.09042	1.85371205942912e-30
566257	si:dkeyp-23e4.3	1027.67379064773	-4.74602	1.85371205942912e-30
101886651	si:ch1073-385f13.3	348.809923705656	3.0384	2.07342030957581e-30
564095	si:ch211-191i18.2	212.154381989413	-4.45476	2.47137462473063e-30
567592	smpd5	266.453922348142	-3.05941	2.64497611014788e-30
735292	limk1a	4438.16258783751	3.12012	2.72550033097476e-30
436858	tcta	4112.79933705815	2.51048	3.08017060264518e-30
101884099	si:ch1073-90m23.1	266.37985166274	-3.87757	3.32758742797857e-30
568405	csf1rb	4771.19846013537	-4.33848	3.78493058107213e-30
336933	rhogb	48100.3103778772	2.41425	4.40152580780971e-30
571290	sema4ab	47020.8027879422	3.15944	4.50212698881745e-30
100002878	fam78ab	465.056300930774	-2.97731	4.66993368833068e-30
795588	slc16a9a	639.515244853148	-3.82477	4.82519202258584e-30
724010	dgkaa	804.783970043361	3.27774	5.49641404359108e-30
557460	gb:eh507706	1642.59789127692	-2.83726	5.81248806032423e-30
101882836	si:ch211-212k18.6	344.755736534244	3.04413	6.09126049597618e-30
567408	si:dkey-151g10.3	526.913036509803	-3.17114	6.44462950967041e-30
100007704	slc7a8a	15078.0181455081	-3.34839	6.44548055251199e-30
100537857	pstpip2	6765.72080182979	2.4939	7.73758997731242e-30
101882391	si:ch211-63b16.4	179.990696298923	5.586	8.21750934294167e-30
100333113	lyl1	921.84711225617	-3.90461	1.25586595759696e-29
100003209	ifitm1	4486.40400834765	5.64679	1.26424974613434e-29
751594	rassf6	157.953489382721	4.79653	1.28016109900047e-29
336998	chek2	370.305638298184	-2.63943	1.52535360025865e-29
108179053	fancb	268.693771800493	-3.22848	1.60054083910313e-29
100004843	si:ch73-27e22.6	12674.5191680766	2.519	1.67885946671424e-29
30167	drl	106.978006873752	5.86944	2.93254856842227e-29
567601	shq1	202.663342354522	-2.90489	3.05052001890392e-29
100150664	met	184.077470689648	8.28179	3.4173045119973e-29
497350	sipa1l2	457.052602099124	3.4384	3.41769696378757e-29
58108	fth1a	34564.9072280349	2.17229	5.38744581222151e-29
101243556	tmem173	1763.15952614888	-3.179	5.75689135409285e-29
326022	si:ch73-158p21.3	6850.87758700129	-4.57914	6.23375920653004e-29
567234	lrmp	391.000065138706	-3.52226	6.48388790718657e-29
337532	wu:fj81e10	3933.19791003304	-3.47178	8.02881837619868e-29
100536291	zmp:0000000634	156.982940405334	4.77914	8.13967933832496e-29
100334819	mcoln3a	20378.1783182294	3.17308	8.26836438608784e-29
30746	tie1	641.946013229341	-3.27682	1.26057596392592e-28
492361	cab39l	4288.94395297251	-1.8538	1.43906916873803e-28
554127	tubb2	165.708551502233	3.37928	1.45385330055147e-28
436795	hgh1	1131.99945194898	-2.61519	1.68941665637989e-28
556995	lig1	634.590819738325	-2.88846	1.70644255919825e-28
447872	dscc1	641.083571385011	-4.25336	2.15486177781076e-28
436769	homer1b	213.255152760837	4.75346	2.43341451564145e-28
58153	slc40a1	13380.2102149428	-3.59835	2.78027104140968e-28
798364	hibch	783.682684723766	-1.91763	2.8248488697978e-28
445472	myo6b	141.876178767309	5.80304	2.8951530834135e-28
570014	LOC570014	579.43665996142	6.42563	3.01301374484989e-28
792923	rnmtl1b	333.520798969888	-2.07587	3.12124427982726e-28
100000026	aldh3a1	966.53114614103	-4.11316	3.22509231838683e-28
321937	frmd6	362.023567648534	5.34449	3.42018448625214e-28
100151626	tatdn1	258.230152744646	-2.64681	3.69383216583829e-28
569469	snx10b	4749.47086475817	2.67453	3.85708308340721e-28
30370	fzd2	3519.70170938356	-3.64825	4.40345288437882e-28
337598	mcm4	6770.41722959765	-2.9288	4.59678070244869e-28
402798	qtrtd1	224.19372363431	-2.58231	5.03494117817086e-28
797699	ssuh2.2	245.69686578269	3.12548	5.39052187080487e-28
100331859	si:ch211-194m7.4	118831.397990114	2.78543	5.42752764129756e-28
790934	mapkapk3	3864.67036166572	1.9799	5.92832212003841e-28
558708	gabbr1b	175.410272068542	5.85951	8.7526917435639e-28
555578	rxraa	1564.44404933548	-3.28159	9.12719521110535e-28
280651	ets1	4128.42758586542	2.42109	1.42306861429383e-27
553298	trmt1	630.125303281107	-2.93862	1.44706572199221e-27
100415792	ugt5b3	634.239481755238	-3.07608	1.45808456706443e-27
324098	cd82a	10059.046796797	1.90656	2.0094095888516e-27
559250	im:7152348	550.425489914929	4.07896	2.09251241132523e-27
541417	pgap2	2107.27972523133	2.22012	2.20137347892289e-27
558684	b4galnt1a	3924.52054180319	3.34895	2.21702103020681e-27
404035	traf4b	1370.98241629902	4.31349	2.38632667011444e-27
100005623	tmem120a	3897.59209697311	2.65116	2.56797209990739e-27
564076	unc13d	7189.71038590868	2.29442	2.9677885452808e-27
394196	nop56	10625.5140219679	-2.03216	3.12069774039264e-27
100334848	si:dkey-17e16.17	642.181095275025	3.65068	3.19015244607362e-27
563053	capn2b	2899.69460446356	-2.01298	3.61811699247959e-27
558500	oxnad1	2225.46892243016	2.07935	4.06374047214817e-27
562283	prkdc	204.992781470396	-2.38587	4.24622460707176e-27
565637	fgl2a	44966.5709883064	3.59538	4.51489656496069e-27
30364	fzd5	375.914711714128	5.89857	4.61107724539475e-27
555377	zgc:162780	150.984093732731	-3.48255	5.10659866935408e-27
393892	bzw2	9757.99324758718	-5.44342	5.16092365230648e-27
321119	mcmbp	1568.09056797374	-2.31908	6.14328853583114e-27
192323	mcm3	5379.24268161035	-3.32766	6.6608587789905e-27
321059	rrp1	3375.93474939807	-1.90646	7.34141633646474e-27
114401	bcl2l1	4264.2946371573	1.98972	8.18356732243662e-27
565225	cpne2	332.215310283249	4.31076	1.07861252170924e-26
101884255	LOC101884255	172.968456712869	4.89064	1.22544675846316e-26
570401	kcnn1b	1404.24832427156	2.96074	1.27420508145625e-26
678516	tnfaip6	88.775398981922	4.68606	1.47246816372703e-26
780840	fam26f	4260.53403051213	-3.23999	1.53422208107162e-26
777758	hps3	2176.11287072868	-2.74334	1.72097721865606e-26
558314	dapk1	1504.58379826871	-4.0603	1.78759972910516e-26
494176	rdh12l	4535.18282511105	2.0925	1.90308250680888e-26
393792	kcnip3a	132.587060450469	6.18765	2.14347053839313e-26
368902	si:ch211-214p16.2	233.687010599294	3.56857	2.3045950830152e-26
568408	si:ch73-111k22.2	7347.48649142698	3.12551	2.49130517965613e-26
541492	zgc:110843	277.852540624785	-1.92321	2.51385903844642e-26
571217	tnfrsf18	611.680955217098	5.29526	2.89934862452364e-26
368450	ing5b	350.284235108069	-3.3505	3.25000059474797e-26
100415799	ugt5b2	4376.0367937705	-2.94255	3.3151672655425e-26
799279	LOC799279	5534.4811799887	2.49734	3.44865547531818e-26
796120	si:dkey-238d18.4	257.189008796915	4.06839	3.48345123935008e-26
323439	slc1a3a	1749.13304277439	-2.95004	3.78470636329451e-26
266796	sec61a1l	21453.8896195847	2.59227	4.09018212513209e-26
100332827	zmp:0000000881	217.049578908697	8.84729	4.23705757779379e-26
393379	zgc:64065	2438.05515882653	-3.90119	4.3651477953315e-26
561001	cd83	3116.20734633284	-5.09344	4.47864642816412e-26
100334259	cntrl	1865.5469004813	2.78772	4.5009167955883e-26
555524	si:dkey-261j4.4	96.436619274586	4.91977	4.56811121656299e-26
553453	samhd1	629.100083479716	-1.78561	4.58251194741153e-26
103909412	LOC103909412	416.622774914864	2.71753	4.98807781052503e-26
795494	si:ch211-256m1.8	256.307523269836	5.3977	5.01054504974015e-26
100148927	mettl8	192.89679010399	-2.358	5.01054504974015e-26
436713	tceb1b	14203.7305362142	2.14716	5.15189946426131e-26
555366	itih5	479.576717244134	6.88052	6.02847742961501e-26
100536137	si:ch211-241b2.5	1564.09484553458	3.45717	6.89801601039439e-26
445390	mybl2b	1026.82449168006	-2.458	7.02229094166362e-26
65239	map2k6	4383.17326153333	-3.48107	8.47275524018324e-26
447856	utp3	1377.65971165768	-1.68475	8.91535797444727e-26
407707	terf2ip	447.055345290109	-1.65846	8.95185349708339e-26
563091	si:dkey-206m15.8	1002.66362257672	-4.93204	1.07663982644986e-25
560699	si:ch211-214c7.4	233.564536823446	5.14387	1.17364088093044e-25
559409	si:ch211-217k17.7	1990.40308092663	-2.51271	1.17564497296976e-25
393143	umps	1472.35422822346	-1.92147	1.55112400283986e-25
100334568	pde5aa	520.348874614873	3.29348	1.55623243417484e-25
100000140	si:dkey-225f5.5	138.786998570914	-5.21663	1.70994413177376e-25
798487	cdk17	3519.29017763852	2.55689	2.51296170170223e-25
108181592	LOC108181592	322.254103096694	4.32548	2.57935982463374e-25
560482	rad54b	209.976422692791	-2.90383	2.58379301685985e-25
559868	arhgef9a	441.830564206426	-2.76826	2.69543592265566e-25
393249	zgc:56525	10840.7556987992	1.9747	2.9884596804967e-25
553460	snap29	1203.50582545308	2.07922	3.17296821593671e-25
108190423	LOC108190423	99.7454325093825	-4.09253	3.29601747347555e-25
100005567	gpr155b	284.780643821432	2.80086	3.30877647969537e-25
555448	snx8a	1304.81537904908	2.44446	3.5165011989373e-25
678588	emg1	718.516681530937	-2.37177	3.53966739467945e-25
110438138	LOC110438138	104.325609374304	2.93555	3.75800571503356e-25
436619	acy3.2	1113.95066548775	-4.13844	4.06959348629333e-25
334050	gtpbp4	7449.70066692119	-1.41031	4.53259966920362e-25
100001748	vash1	209.995761177071	3.94927	4.77294677569436e-25
436766	jdp2b	4083.23008278629	-3.90019	5.06229482866798e-25
792610	hspb6	87.0581094796541	5.51764	5.30367851669712e-25
613144	dkc1	7738.68172514569	-3.03547	5.41268762689016e-25
553503	fbln2	4438.05172659182	3.88375	5.70518600165928e-25
569945	gfpt2	97.9732186641431	6.89657	5.90378449928586e-25
100148935	ushbp1	157.255540846321	-2.84142	6.52116268006363e-25
564177	nrbp2a	2532.00530206043	3.23353	6.53256954554835e-25
100003849	si:ch211-157p22.10	1897.92233821364	3.46574	6.61647037659961e-25
100150349	si:dkey-27h10.2	9117.06847605718	3.46105	7.04306833846912e-25
492480	rnf24	2016.12499080074	2.96712	8.80995728847613e-25
793765	prlh2	677.527192081832	3.66565	8.80995728847613e-25
415197	nudt15	930.580856567431	2.19634	9.06996873922276e-25
751677	batf3	1663.33063452814	4.39649	9.10465096648815e-25
563270	prelid3a	210.572103696199	5.91647	1.15636719144732e-24
442932	gnl3l	664.411007174605	-1.61307	1.16535668081466e-24
554096	noc4l	1655.48007157456	-2.02298	1.28167050554565e-24
100332460	clcc1	2440.19036384675	2.78836	1.28167050554565e-24
103910066	LOC103910066	604.212725698868	-3.21891	1.45317070630539e-24
108181220	LOC108181220	166.945207786691	-3.97382	1.57000462705066e-24
100005476	si:dkey-56f14.4	192.424016389447	-3.29855	1.70680372486178e-24
30430	dnmt1	1955.45131888132	-2.80052	1.78031556404739e-24
566019	acss3	2284.21437590013	1.82786	1.88350841104374e-24
103911838	LOC103911838	404.551318600148	2.79546	1.94899338720422e-24
567667	slc12a7b	6507.09129414708	3.4072	2.15547071589216e-24
403139	tlr5b	23107.8930593161	4.35826	2.17709300538857e-24
100049705	lama2	92.1673027487262	3.94707	2.24481324010861e-24
393106	rad18	545.222750151987	-1.99884	2.27425305227262e-24
558403	mutyh	353.833816286941	-3.51448	2.34101873491614e-24
30072	inhbaa	1351.29404914364	3.33518	2.47957236135637e-24
101882781	LOC101882781	1391.17940553999	-4.64447	2.71132188523199e-24
406715	cdk2	1656.07914410622	-1.97981	3.01323369852461e-24
100148293	si:dkey-9k7.3	746.578584581674	-4.64121	3.26898402080676e-24
393548	gadd45aa	1667.38608910439	1.87288	3.41142516946764e-24
325958	tsku	4101.86574482107	1.99763	3.60581260759071e-24
556362	alkbh8	909.293522710848	-2.03824	4.06975853946038e-24
552960	cybrd1	1522.06012016055	3.62964	5.09488907662874e-24
494039	c3a.6	359.269962260396	12.01	5.12504317549921e-24
30177	ikzf1	9886.49216340054	2.35439	5.50783252108795e-24
101884045	LOC101884045	361.029356913896	2.72401	5.79324235931381e-24
550236	cdca7a	2180.82832892585	-2.37374	5.83173219292063e-24
321695	smurf1	4579.7849522202	3.08939	5.85641499473312e-24
30219	efnb2a	764.050019758394	3.99447	5.88119672772003e-24
566409	mcm6	4732.17185198235	-2.92929	6.10465269238024e-24
324152	tax1bp1b	18335.566730861	2.37691	6.14045040332278e-24
556409	g3bp2	1347.97827599846	2.06765	6.15171845036498e-24
431715	rbck1	3057.12309366361	2.40918	6.62342343552476e-24
393904	gipc2	245.837223890576	2.75817	7.04752543381811e-24
393774	pole3	603.581131810468	-1.66247	7.21125568245797e-24
334219	zgc:77650	4333.25042362925	2.41879	7.69736543263368e-24
558718	rrn3	1834.3136237609	-1.6592	8.21920206574112e-24
101883373	ptgfrn	5145.69213834161	2.41196	9.43323494945095e-24
337424	arl8ba	13488.3167343259	2.49114	1.2856321887569e-23
246226	ptgs1	262.431674694462	6.88543	1.31014996105242e-23
553068	im:7148292	2901.92508283846	-2.20511	1.58044780331936e-23
559384	prf1.5	151.694381965025	-3.64113	1.58684739771566e-23
566122	ncam3	1562.34704814634	3.73899	1.6571129052341e-23
103909286	LOC103909286	463.886452857541	2.73359	1.91294999852758e-23
445399	ddx56	2265.16324079858	-2.06605	1.97320446896751e-23
100151157	si:ch1073-157b13.1	2999.27975600124	-1.36231	1.98692240827699e-23
564674	LOC564674	436.762192968509	-4.08349	2.25612047904723e-23
556618	tp53i11b	2064.86817520769	4.86895	2.25612047904723e-23
387591	ivns1abpa	2343.08809066143	1.62318	2.2901822814051e-23
100000322	trpv6	464.553830294674	-6.21929	2.44942243457527e-23
559330	fam13a	1761.85146313241	-2.8318	2.5591133435346e-23
114447	cxcr4b	1739.34200603717	-4.2227	2.63713357034473e-23
406420	wls	6592.22961964016	2.46326	2.73333056770587e-23
100001845	slx1b	633.627520040756	2.1416	2.86220747969299e-23
100536712	si:dkey-16p21.8	625.777559482839	4.17617	3.17441926985606e-23
572245	noxo1a	180.465739013682	4.49995	3.34559017046942e-23
100536909	si:dkey-31e10.5	3272.46255588653	4.29574	3.57003158641507e-23
406350	uhrf1	2403.76802595986	-3.02207	3.57804139550679e-23
445387	ddx51	999.554891929534	-2.22528	4.48284484493611e-23
282559	aldh3b1	395.228144445501	-1.96911	4.84540126986623e-23
100000884	LOC100000884	515.023693833981	-3.3277	5.41230921828734e-23
393552	slc25a34	531.621291681703	-3.30273	5.49105038811021e-23
406261	pdcd4a	4664.79575186323	-2.05129	5.78384413645942e-23
393361	pigm	1434.97997997272	-1.62793	6.55971501878259e-23
553776	calcoco2	723.732778731192	3.41403	7.89183134251751e-23
321130	nop2	4822.97193109477	-2.18278	8.21490742485933e-23
561983	usp6nl	561.248124030819	3.0043	8.60693172116061e-23
558324	sytl5	222.878135565867	6.82242	9.01526081785671e-23
30740	rrm1	9432.55864548396	-1.80745	9.69779411787747e-23
323426	mphosph10	2342.41939026201	-1.95886	1.02295613271206e-22
368901	si:ch211-214p16.1	223.246249320091	3.99862	1.18324325689837e-22
325896	cnp	8640.23506598302	-1.65992	1.18721644325527e-22
556424	rhoga	961.661272743588	-2.45973	1.34068604520462e-22
436921	slc38a5b	579.434357996298	-2.31708	1.39930059096924e-22
100537903	si:dkey-239h2.3	211.749582700439	-3.61735	1.583357282086e-22
560548	si:ch211-15b10.6	7592.81935209453	-3.12512	1.60199994434722e-22
550331	elp4	540.766462148927	-1.68201	1.60372104242057e-22
100537878	ldlrad2	157.903283626806	6.69453	1.85789138290772e-22
797099	fam207a	741.926931072438	-2.49823	2.01507185630887e-22
503732	rtel1	291.672075169003	-2.34324	2.05349692364353e-22
103908782	mfsd7	284.435583111335	-2.99943	2.08447501878147e-22
286787	diexf	1041.72214417458	-2.28234	2.27136433115543e-22
326099	plekhg4	358.540000900563	5.94782	3.12043548126074e-22
57969	copz2	927.335329519985	2.4874	3.15420790850394e-22
561268	tnfsf13b	569.241959545957	2.31482	3.15420790850394e-22
100136865	abcb4	25670.4849812501	4.23876	3.32607104312247e-22
101886216	LOC101886216	2050.65641210984	4.07688	3.53538545879305e-22
564015	cnih3	69.3922519737105	5.72451	3.98042128518399e-22
566455	jag2a	178.479675789415	5.79742	4.5494472164858e-22
567472	LOC567472	600.100715757602	3.36466	5.62552155556525e-22
402851	oprl1	226.101093198124	4.2933	5.74452961794246e-22
793303	cited1	147.882498482049	4.19168	6.09346144320242e-22
100034442	si:ch211-222k6.3	389.740620348805	-2.30675	6.54336518616617e-22
101885900	LOC101885900	28068.9494261314	3.42345	6.85286666360138e-22
553506	nucks1b	1830.46486187438	-2.96633	7.74797273347664e-22
337376	alox5ap	13328.6699075909	2.28871	8.0595940685999e-22
406342	tcirg1b	71755.0070024111	2.10927	8.70129224801534e-22
567734	dtymk	697.865649541678	-2.34609	8.77206734945406e-22
796456	pold2	524.9295370578	-2.82949	8.77206734945406e-22
327053	rrp15	1750.99268602933	-1.86088	8.79013435025489e-22
555663	si:ch73-70k4.1	80.6537211627822	-4.11017	8.88154428143939e-22
553683	lpcat2	31425.0541046994	2.35032	9.21737196784562e-22
541344	prdx1	21601.3500956579	3.42672	9.28456031015686e-22
101884507	LOC101884507	90.4976429188526	-4.2568	9.69080565138987e-22
100006805	LOC100006805	73.2254981235259	5.22878	1.01956287436186e-21
327239	usp36	1579.37561214297	-1.79457	1.02139328076526e-21
415241	calua	3380.19919280046	2.0021	1.08040500548105e-21
799570	nasp	1676.92672869477	-2.1818	1.08040500548105e-21
100034410	rmdn3	486.530657285908	2.18447	1.11101480805813e-21
492514	dph5	460.215599725116	-2.66951	1.13048234023736e-21
317637	wdr43	6757.89002279712	-2.01556	1.15222988533246e-21
378993	satb1a	125.469960673961	4.94268	1.17884178785727e-21
30471	qkia	7015.79868878968	-1.33082	1.18484675235143e-21
503748	rfc2	1101.9687735129	-2.70138	1.21003667827323e-21
436682	rbpms2a	571.525355572839	4.56009	1.27036617861408e-21
798982	ptbp3	4440.89038926716	-1.87369	1.30202151229679e-21
336563	wu:fb13g09	111.699394054542	5.10796	1.30465523102613e-21
553452	si:dkey-180p18.9	1159.19941381364	-2.692	1.33187359360776e-21
317644	nifk	2711.02032099448	-2.05881	1.41422021141352e-21
563054	gramd1c	786.140154927109	2.27484	1.52407301586215e-21
393551	cyba	59955.1068788672	2.17057	1.59357772330538e-21
100149322	mast4	545.365224057657	4.04442	1.60566526494069e-21
557062	fmnl1a	6479.96550212433	1.51607	1.62372157216794e-21
553366	ccr9a	3986.38553131153	-2.06729	1.7340096917953e-21
431731	litaf	5118.26732951508	1.80935	1.7340096917953e-21
571744	oafa	1592.08244193873	2.93316	1.81439594841986e-21
568008	wwtr1	313.354636898873	3.95978	1.92123831397318e-21
797213	si:ch211-42i9.8	1555.4483377699	2.88382	2.33494946733532e-21
100008366	LOC100008366	169.28813040033	3.23482	2.37738824660447e-21
100003611	si:ch211-26b3.2	952.405014821906	2.20689	2.41794564628091e-21
447833	hat1	1950.02087302833	-1.75941	2.50439124010008e-21
641291	ahrra	261.712895514257	-5.41904	2.52693738101571e-21
100333254	nfatc2a	1636.28673917156	2.90173	2.68409944751949e-21
100147938	LOC100147938	225.381668196984	-4.49658	2.92963527505509e-21
192336	atp6v0ca	139639.619361286	1.68159	2.93107378642325e-21
570279	zgc:194281	226.432065807478	2.13271	3.06986875817328e-21
335409	socs3a	8817.61575534366	2.42243	3.13144665074327e-21
767807	abi3a	3767.71652475063	-2.27443	3.48889452451302e-21
103912059	si:zfos-1069f5.1	439.294643677177	-3.43425	3.90600027936394e-21
192305	adssl	6865.63625092833	-1.49219	4.34563414145369e-21
437017	abhd17b	643.762611545012	1.77666	4.47346701887147e-21
799479	adgrg3	20704.3729189734	2.39887	4.47346701887147e-21
393863	heatr3	1749.8196775423	-2.39556	4.53507951708054e-21
402943	stard10	922.439143985192	-2.55228	4.60888174561072e-21
560417	ptpn23b	3977.24154878278	2.72268	5.402784883955e-21
568044	sall2	87.8262983614236	3.39651	5.4792764298932e-21
393393	adprm	1535.47635806194	2.04991	5.49639763257937e-21
569735	slco3a1	1224.55883181322	4.08739	5.72476042566977e-21
436998	zdhhc3a	1412.24626066027	-2.1054	5.93658021681621e-21
403070	rgn	649.03080551357	-2.56703	6.74660690676873e-21
555737	prkcz	232.512789497205	3.47774	7.62043474036161e-21
562399	enpp1	13458.4246240724	-3.16525	8.01645625440016e-21
447817	zgc:92161	284.79249218426	-2.28093	8.38016715685116e-21
565029	tnk1	1079.42304959601	1.7266	8.48096535786482e-21
504038	si:ch73-138n13.1	681.114645066274	3.64647	8.50107723831716e-21
559102	rangrf	1730.9902983467	2.05236	8.55391831754836e-21
405879	zgc:85858	1328.0613543421	-2.06479	1.00147184572106e-20
566550	si:ch211-260p9.3	2500.46322664886	2.94729	1.02800325408624e-20
561624	snx22	557.707745231468	-1.98187	1.02880186865466e-20
100150678	taf4b	119.155182017291	10.4175	1.15714172296777e-20
436707	havcr1	45748.1108374393	-3.05286	1.18645850852616e-20
325287	wbp2nl	57558.6547039646	2.08635	1.19815066826285e-20
560601	slc8b1	4784.70719202292	3.56257	1.19836993533067e-20
678636	mettl27	195.487382564887	2.62178	1.22230489740544e-20
378724	arf5	2345.83534273292	1.69002	1.22581889136283e-20
557660	palld	116.323280648384	3.74013	1.31762575188374e-20
101884238	LOC101884238	101.071967429316	-5.00995	1.38546958382997e-20
566849	cyth4a	1383.97294076037	2.38294	1.42742050962091e-20
30068	cat	4176.06222024449	-1.74447	1.42742050962091e-20
100150414	si:dkey-85p17.3	3880.77977007999	2.13638	1.45151446218022e-20
793920	il2rb	297.440089030809	-4.56455	1.47435340734985e-20
557738	ccny	3267.18780372457	2.61352	1.5498999090263e-20
30554	pla2g4aa	396.392947887724	3.21104	1.5691605235234e-20
553526	zgc:152774	348.089245077834	-3.62223	1.58971007483087e-20
100536120	havcr2	4497.5980920134	-3.29848	1.61824287925265e-20
559784	amotl2b	325.270348610471	4.61496	1.63515710978061e-20
550421	znf367	1286.49812807863	-2.29973	1.72964518484494e-20
403027	snx10a	14065.5080656265	4.14575	1.7637029538779e-20
393809	cap2	130.976638286066	2.11541	1.82242471000829e-20
100317168	si:dkey-221j11.3	98.4205955452242	6.10126	1.93518719075726e-20
368424	snx9a	247.90673895055	-3.14564	2.0365790523591e-20
192312	mak16	3496.58705958539	-1.79135	2.04997505515133e-20
557997	olfml2ba	3149.86373173902	1.63118	2.16644246590195e-20
30496	ldha	35454.6589845721	2.06385	2.17080463871868e-20
569085	slc19a2	1530.64961145629	3.82264	2.18675819682888e-20
100329277	si:ch73-308l14.2	1234.01691180432	-2.88652	2.29031849404755e-20
555272	rabgap1l	18250.7202362006	2.14253	2.38371404353787e-20
553606	nle1	1705.52458700275	-2.29556	2.52714702130042e-20
560569	zgc:162964	559.910946238188	2.44964	2.66169670595776e-20
406415	tmem263	5124.15868713811	2.60359	2.66169670595776e-20
560100	adora2b	2957.61050543452	2.54985	2.80207847226749e-20
335269	itgb4	315.630450472981	3.18527	2.88358619153578e-20
557083	ehbp1l1a	304.376046825138	-3.47894	3.10085962620268e-20
393201	polr3c	1055.8333758711	-1.29307	3.12716036900684e-20
100321084	si:ch73-52p7.1	1735.69364907798	1.91118	3.23527092487505e-20
378844	ddx27	1213.69894620074	-2.12439	3.27945913550279e-20
407727	slbp	1718.42741067743	-1.89294	3.29244274419049e-20
393195	rnaseh2a	1458.33869717893	-2.71092	3.3062143010849e-20
406397	mmp9	2921.76656195771	4.99161	3.37593559389314e-20
101886606	si:dkey-37f13.4	3541.78207016609	-2.69113	3.41665850236077e-20
100142639	timd4	191.314069242399	-3.20551	3.69913208187555e-20
566275	arhgap42a	73.288277455892	4.63917	3.8100446168632e-20
338247	echdc2	8807.56734865006	1.52728	3.99403387404079e-20
100002795	doc2d	258.502066435963	6.236	4.14533426705101e-20
321070	rock2b	315.663155566399	6.7207	4.3383471353759e-20
415149	lum	957.686942329355	-3.17177	4.40844618466736e-20
101884451	LOC101884451	5099.39734481082	2.27931	4.94793800897501e-20
100333587	si:dkey-238f9.1	86.9490299882229	4.61421	4.94793800897501e-20
327491	rpa1	5461.72094721783	-1.51608	5.12882354575666e-20
797512	fut8a	2612.98781077305	-1.89965	5.30192682259173e-20
393886	mad1l1	885.78050445987	-1.95188	5.92520130305941e-20
100000104	stra6l	1292.72047151752	-2.4298	6.04484219012405e-20
449778	dtwd1	416.281886395647	-3.04815	6.18002627746441e-20
556612	serpine3	1123.12629413	-2.64046	6.70312039911921e-20
81540	tyms	978.447925855225	-2.24905	8.33820984113432e-20
559502	mrc1b	13919.3024317639	-4.62115	8.34946946413767e-20
393171	tpst1l	2436.28951274423	-2.19371	8.39908844249635e-20
561131	nolc1	5602.35559447411	-2.12732	8.50280080339014e-20
101883094	ccsapa	135.076315865402	7.26803	8.77536362905244e-20
337520	si:dkey-256h2.1	151.064018774839	-2.89913	9.03308916451556e-20
322339	cs	24215.6914979527	1.80168	9.03571035504072e-20
566307	si:dkey-48p11.3	394.111714275086	-2.1222	9.24556218042125e-20
570288	flncb	376.77917085957	3.87176	9.72784693625069e-20
100329505	hgsnat	2446.08555408936	2.40362	9.99344692438954e-20
797198	rrp8	192.089601404183	-2.47537	1.05685301926437e-19
386897	asf1ba	682.891566076667	-3.05452	1.11541614841386e-19
100538158	LOC100538158	98.7525935090427	-4.21054	1.135308288525e-19
436988	zgc:92360	840.24281170422	-1.98703	1.24405797857932e-19
368631	pms1	261.623503420304	-3.10087	1.31290395388599e-19
406760	eif4a2	522.514147051036	-1.68143	1.38835156585906e-19
568021	tp53inp1	3342.43254275509	2.45552	1.42771006447412e-19
436999	wdhd1	1118.54804396233	-3.51718	1.45032458950209e-19
553066	pyroxd2	2174.54458305845	-3.14617	1.45334098919617e-19
553565	wbp2	1909.41153299494	1.81644	1.58834606673301e-19
402856	twistnb	1537.98934570035	-2.39057	1.71306297600026e-19
431754	acaa1	1408.90892828694	-2.02166	1.80525239544388e-19
394139	hpcal1	496.873900128978	2.97654	1.96245294334201e-19
100318301	dhrsx	313.996330883101	-3.01086	1.96252035539232e-19
445388	rcl1	1857.55342336857	-2.17381	1.97585082236231e-19
445223	nek7	10913.6314772506	1.88103	1.99337715242943e-19
562403	si:ch211-1o7.3	9463.37683377842	-3.80306	2.09081712674054e-19
335176	pon2	420.063956107406	-2.03109	2.12655929195873e-19
406479	orc5	740.610764561023	-3.42498	2.16036172533372e-19
791578	dhrs11a	123.131718294586	7.07025	2.48476050183278e-19
323588	pik3r5	3722.45678705886	2.09872	2.51793101941178e-19
386763	tead3a	271.556414406279	-2.50827	2.75407430166898e-19
570079	LOC570079	114.125099253352	6.73568	2.78232995431686e-19
100415796	ugt5b5	134.980890129372	-2.82995	2.79457084799064e-19
100538242	LOC100538242	177.076325718346	-4.39591	3.01253783780608e-19
447938	rassf2a	10810.7123326959	-2.07599	3.02406542777492e-19
553368	mgmt	117.528700560272	-3.26511	3.0968823685053e-19
569441	tp53inp2	297.775437600225	2.35005	3.17147433535525e-19
406604	gng12a	6805.34177375259	1.81958	3.25958461300402e-19
445151	entpd1	23080.3992106589	-3.17347	3.33824942614446e-19
100135755	il6r	10299.6246061158	3.00939	3.34943294336861e-19
393652	lyar	1628.73526684016	-1.98876	3.41855169748664e-19
337399	rrs1	3591.10017479389	-2.029	3.56638706343919e-19
436735	dusp23b	268.879325760691	-2.60464	3.92811012788857e-19
100537993	LOC100537993	119.557368460727	3.22038	3.97009177686404e-19
555612	orai2	265.668159020003	2.43508	4.01219154338827e-19
566131	eif4g3a	610.073585603434	3.45551	4.07027602630551e-19
445385	rfc5	871.656667282336	-2.15568	4.41502530998134e-19
321127	ddx18	4226.88669974206	-1.89366	4.56183193256281e-19
569375	eml2	2165.89126145432	-1.99687	4.64483503596985e-19
322041	ip6k2a	6077.15714161668	-1.99876	4.73842020349803e-19
403137	tlr8a	130.986555200808	-4.79022	4.81969082269515e-19
494093	spice1	1035.94586677919	-2.36821	5.13941286339751e-19
553646	sptlc2a	11924.9817449708	1.53697	5.32364916996527e-19
406329	dhps	948.170442982543	-1.73549	5.3978489915925e-19
100005700	stim1b	881.373986942805	3.05149	5.48048899393653e-19
317740	pola1	957.151403856322	-2.60268	5.6788653001899e-19
791107	hs6st1b	799.773384798561	2.70005	5.71416737543706e-19
327197	vcp	17984.352417045	1.78236	5.71607312091667e-19
100334023	tmem63ba	1776.51324173771	-2.09327	6.04758667269646e-19
394244	ndel1a	1019.27029688002	1.7568	6.32121982933373e-19
406650	timp2b	9322.07606991601	2.04047	6.35035389163671e-19
445162	dimt1l	541.457345976467	-2.48498	6.74655626729514e-19
100005593	adam8b	464.362601461883	4.79482	6.75695850860753e-19
100333889	si:ch73-209e20.5	526.265779444815	1.91124	6.8237933236795e-19
100149956	rgl3a	203.760002071656	-3.91157	7.24764574991466e-19
100151586	zmp:0000000930	1167.64265328731	-3.29277	7.24764574991466e-19
445320	hspbap1	611.993215475147	2.00098	7.32693850448721e-19
541520	cdcp1a	101.084544386209	10.1791	7.89311027372176e-19
641327	ca10a	100.610161613388	7.17632	7.92181601850411e-19
58026	psen2	6172.13142844765	1.21377	8.32691280338306e-19
564081	dlg3	136.844793504456	8.20311	8.57671066002401e-19
100330160	nampta	8478.71685911599	3.36341	9.29543417045598e-19
678543	zgc:136858	106.932093893761	-3.86582	9.33176862565081e-19
405764	blnk	17763.3121250796	2.38612	9.5521804206316e-19
100001516	si:dkey-222f2.7	777.981819782453	-2.551	9.80768644591941e-19
393538	polr1c	1224.84810394584	-2.03272	1.00892625270649e-18
558476	stard8	236.063188978012	2.69892	1.04857477966593e-18
562840	rdh10a	152.294197039269	4.1272	1.11752131701947e-18
794796	rai14	467.962451666583	2.42783	1.12389663660081e-18
100003553	dis3	155.457429604201	-2.73084	1.16724563139526e-18
80872	sms	1249.82933024447	-1.86258	1.22062530331862e-18
570455	cyp7b1	260.451028171367	2.40871	1.25182570855687e-18
321289	noc3l	1688.66203143102	-1.72641	1.2658493568027e-18
100334777	dfnb31a	64.2163030685039	5.36796	1.35795839675193e-18
751741	spg20b	1880.46604249538	2.30267	1.36091713430408e-18
110437974	LOC110437974	183.276652099889	-4.20088	1.3839527347513e-18
103909698	LOC103909698	67.1999602242754	4.17367	1.39940029010847e-18
405841	zgc:77086	2137.99739534164	-1.23664	1.43146424340382e-18
794026	camk1b	842.331114286436	-2.86173	1.51645353556149e-18
100149618	p2ry12	2603.58877503871	-2.97241	1.52418626358424e-18
563506	tiparp	1148.86827925433	1.55014	1.52611036920542e-18
561339	rap1gap2a	300.353779052258	-2.47689	1.61018310953917e-18
393717	smfn	808.007351384882	-2.44694	1.61567318887013e-18
100332384	si:ch211-215e19.3	307.059122376464	-3.90546	1.66132207981135e-18
571305	gnav1	231.858690636631	2.45221	1.6977729174898e-18
322178	si:ch211-168f7.5	219.319207786752	2.47236	1.87728975626963e-18
570351	wdr4	1241.14377363597	-1.69589	1.88304704895472e-18
569546	ehd4	11328.6188880378	-3.35068	1.88560165167183e-18
394240	ahcyl2	7446.3995051715	1.82664	2.07723516789912e-18
110437990	LOC110437990	4522.61428944792	-1.7282	2.22055946695653e-18
572256	zgc:162879	177.349040898847	3.79339	2.28546716467871e-18
399546	pxna	1434.90203839383	2.63149	2.39869320715857e-18
556502	adma	193.718023235842	4.29329	2.53114157244119e-18
394198	fosab	29204.0379057637	-2.24451	2.78525561585356e-18
556716	si:dkey-7i4.1	414.642115443801	-3.46257	2.91791596510112e-18
100004946	trpm4a	105.571325604334	5.1615	3.13031256049009e-18
192333	mcm7	6561.09772294478	-2.97833	3.13183349787381e-18
565109	agap2	1201.29110766418	-2.32157	3.16227619616968e-18
569642	tac3b	70.4137492215074	3.32194	3.27715475592288e-18
335987	gypc	310.19354109159	-3.49362	3.308013662996e-18
100149559	cbln11	90.7536143545371	10.0239	3.34869707509583e-18
567428	vwa2	664.102481678087	5.90407	3.46261208935694e-18
561333	abhd13	1287.28232395434	2.1261	3.48371955476909e-18
556763	tmcc3	3680.01340713743	2.80739	3.57533155741014e-18
570436	nid2b	135.928018735069	2.80882	3.65141132255211e-18
541538	zgc:110540	1471.04411681602	-2.78872	3.73454794628312e-18
563411	mms22l	966.275875262702	-2.35856	3.75351025797652e-18
337663	mxe	138.195118390144	4.54484	4.0220034283445e-18
559958	cdaa	2722.30552755035	3.34298	4.09356484408913e-18
619253	snx1b	552.838327630753	1.40161	4.14909828492401e-18
402884	tlr21	419.882068411081	-3.87096	4.50525861766001e-18
100331457	l3mbtl4	1205.12332164833	2.84467	5.01906600898776e-18
373107	birc2	14216.2584803854	2.29831	5.09546535960945e-18
103909419	LOC103909419	121.959713874356	-4.05945	5.33492665845857e-18
100331729	tmem176l.4	2192.19855991119	2.97028	5.56139899225936e-18
562350	nup107	4270.51231130287	-1.14804	5.72630092274616e-18
568432	wdfy3	2133.15133181503	2.00624	5.95901341554991e-18
790939	zgc:158403	877.814098531887	-1.44461	5.97271425712108e-18
558391	sdk1a	414.312382135651	6.52045	6.37433580062221e-18
553196	tmed8	6316.49357290283	2.34508	7.0082980026412e-18
100002392	LOC100002392	98540.6986457564	3.00765	7.24380101575668e-18
562343	specc1	1507.99904761552	-2.67757	7.25936417228478e-18
101885611	LOC101885611	2678.23838426747	2.10245	7.45944344593861e-18
557205	phykpl	66.0007884838861	-3.18396	7.68167295034185e-18
560765	robo4	2005.6091402604	-2.5933	7.9560001602055e-18
100136840	serpine1	12399.9084836051	3.47946	8.96725435150266e-18
317739	ppan	1228.8941849974	-2.06424	9.22014369020917e-18
286778	c19h1orf109	307.104973885004	-2.18029	9.3853800732319e-18
553498	si:dkey-251i10.3	1891.17838203892	-1.81801	9.83878044409221e-18
100415791	ugt5b1	985.289278766163	-2.23617	1.03452391003209e-17
393744	dctpp1	131.130798491874	-3.23515	1.06875014979868e-17
436833	gstk1	931.963249476543	-1.89591	1.08004727796916e-17
436979	lygl1	105107.787965516	1.98786	1.23886570785089e-17
110439893	LOC110439893	240.344003178441	-3.85174	1.24723195650775e-17
108181194	LOC108181194	471.141026185236	-2.38009	1.29948420376771e-17
30644	mtmr2	4860.93670391929	1.54837	1.30857631551943e-17
503760	poc1bl	2673.99853275394	2.75884	1.35284965507811e-17
334271	nufip1	356.372564971163	-2.55268	1.35751631610698e-17
415238	rpp40	672.005006291366	-1.72446	1.37447350257196e-17
393596	wdr46	3908.27570207871	-1.28947	1.51233864389017e-17
337199	rab20	13129.3465477631	1.69773	1.51233864389017e-17
100141330	zgc:171534	222.591611602212	-2.88947	1.53607514544188e-17
560000	cpt1ab	768.503785310593	-1.94123	1.62819001723276e-17
556711	gpr18	1673.19849690809	2.76313	1.74441947355041e-17
393469	gmppab	5186.48093408561	2.04348	1.78636903074884e-17
57926	gpr173	136.901764686895	3.45217	1.84004539876712e-17
393590	fam84a	197.045596498853	4.06525	1.99363566239136e-17
260437	msh6	823.860379846309	-2.57065	2.02439832461406e-17
100147913	bard1	106.847168718419	-2.29773	2.08897474874577e-17
100322074	si:ch211-171h4.5	621.493877244362	4.22432	2.18255029009124e-17
317744	dnmt3bb.1	1818.33039470578	-2.42994	2.18938841507497e-17
445106	yipf2	3458.58758787554	1.55601	2.25478090800416e-17
557086	tp53bp1	1288.99538024437	-2.58108	2.34786029126679e-17
108181174	LOC108181174	115.244658619788	3.62878	2.34786029126679e-17
564078	trmt5	780.835737696576	-2.11177	2.3502161945926e-17
393366	rasl12	135.019356118639	6.6169	2.52832955930447e-17
394064	exosc10	1158.77176983722	-1.34968	2.55728727793667e-17
322420	chia.6	191.570480223917	5.14547	2.61141219141701e-17
393814	plek	39031.2032420896	2.09245	2.6483845424787e-17
562542	LOC562542	6963.89644730655	-3.38595	2.65174129282808e-17
110438342	LOC110438342	323.289567446867	2.90116	2.65174129282808e-17
406296	atp6ap2	63602.3343447081	1.71987	2.80216063253859e-17
553656	hrasb	565.874348795621	1.40938	2.83400642439218e-17
100000119	tmem245	3421.53539034487	-1.75659	2.88125529439983e-17
101883054	LOC101883054	289.047139292682	-2.94198	2.95681613050223e-17
570117	si:dkey-7l6.3	601.316549892332	1.63788	3.18485267475982e-17
503603	dph6	622.308926400923	-2.38165	3.29875370216981e-17
560743	lpxn	13973.0232816557	1.52075	3.3393192977807e-17
324490	eif4ebp3l	5630.80353516892	-1.78632	3.40183123769196e-17
559790	si:ch211-106h4.4	907.412351101395	-3.08765	3.42146507912083e-17
402948	cd151l	213.20460950266	2.36772	3.53263742865026e-17
403114	adm2a	195.04063101942	5.16333	3.67170586043979e-17
100322075	adm2b	71.3913755146075	6.2699	3.7642496730415e-17
406275	fbl	8886.80302847937	-1.91114	3.88749033471654e-17
324215	igf2b	926.362657559415	-2.74429	4.31859506709115e-17
553760	psip1a	269.87163789227	-1.85708	4.33638012355195e-17
393262	pwp1	2036.42266931794	-2.008	4.5353648649822e-17
436706	dnajc9	1053.98991175755	-2.00976	4.59294304107176e-17
100005359	si:ch211-286b4.4	216.757514466404	-4.46699	4.59294304107176e-17
797259	si:ch73-92i20.1	699.600163525122	-3.21076	5.05601269521382e-17
335453	grnb	2052.88998007332	1.47455	5.18199706261807e-17
378478	egfra	490.397315100645	1.96635	5.21028432428079e-17
80963	rnd3a	5037.73904412491	-2.13224	5.60086522253306e-17
100536590	atxn7l1	275.814180208651	-2.10432	5.65732897478843e-17
445410	il12a	627.408904335506	4.63004	5.87941293297243e-17
327379	calm3a	1331.31238736093	-1.93034	6.01134716844583e-17
393105	hsd17b4	848.833722834915	-1.86319	6.37079304189219e-17
406778	exo1	92.4283907506844	-2.92016	6.48593959131557e-17
563212	chaf1a	1080.92287469573	-1.95977	6.87348741630863e-17
494053	lxn	5437.19412980062	-2.42241	6.9272959551849e-17
100005116	arhgap24	403.113033914993	-3.62567	6.96966898476859e-17
100535890	LOC100535890	436.250330646302	-1.98724	7.20513294580198e-17
559014	si:ch211-136a13.1	257.120818101998	-2.60851	7.30661737412519e-17
406435	rfc4	2218.91287250661	-1.74713	7.43586417476992e-17
393313	ube2nb	4470.78159316195	-1.80862	7.60314350655848e-17
394066	lin28a	76.9423969628522	6.74665	7.60314350655848e-17
101884098	LOC101884098	546.080474023164	2.7776	7.60314350655848e-17
558071	atf6	2878.52723257227	1.86612	8.22226052924034e-17
393947	arpp19b	1690.37500989584	-1.73868	8.22549059235417e-17
492474	dennd2db	233.151787413429	-2.89048	8.32757378553089e-17
793969	ccser2a	70.7125068522873	4.37862	8.46233734972635e-17
103909146	si:ch211-243a20.4	6687.84577828701	1.42105	8.47259924852452e-17
110439153	LOC110439153	84.6085584509627	-4.09931	8.47708858501212e-17
100004161	tbx5b	86.4291262839441	4.73441	8.56337297932482e-17
100149189	si:ch73-237c6.1	6976.36732882492	-3.21307	8.72939669219899e-17
431740	zgc:91860	160.393639855101	3.0003	8.80085823976331e-17
337583	atp6v1ab	16033.5393126779	1.46279	8.89449787143197e-17
405878	fbxl15	200.190021014956	-2.43316	9.09224423177207e-17
406598	pik3cg	18944.9379367278	2.13942	9.15073800640662e-17
492346	fosb	719.924195441163	-4.47425	9.50606212860246e-17
30130	men1	879.875063378727	-2.8539	9.7511296792693e-17
100000715	msl1a	683.001403975996	-1.4899	1.00857892156685e-16
100000647	kctd13	1501.94648700595	1.63186	1.03159210220762e-16
100330448	peo1	591.186649572265	-2.61289	1.05064417882502e-16
110437880	LOC110437880	460.610164880956	-1.76558	1.09642811738524e-16
553232	znf296	1232.27940898464	-3.26587	1.10942633597832e-16
393583	tbc1d5	14338.0474662674	2.13383	1.11712703078962e-16
321724	atp6v0b	50805.9093377736	1.82654	1.1296200065002e-16
30440	prim1	414.845689752856	-2.14255	1.19545881457354e-16
449835	dut	872.848134804367	-2.01052	1.22790879032721e-16
550335	zgc:110224	282.421876102624	-2.70885	1.35761826065783e-16
100149497	rapgefl1	342.120792102695	2.44145	1.38832697047297e-16
569271	ankdd1a	221.346117949162	2.4654	1.38832697047297e-16
445389	gtf3aa	970.547335054754	-1.70134	1.41739445567692e-16
103911274	si:ch211-105j21.9	557.594122646418	2.28273	1.44732050575906e-16
798092	si:dkey-76i15.1	97.7912370526157	7.68938	1.45337033719451e-16
553707	prelid1b	800.399263292095	2.27294	1.4576739232817e-16
567536	myo1ca	1466.3503511629	5.62655	1.48377141629436e-16
798401	tex2	4452.50887646671	2.55101	1.48944662014053e-16
100537860	LOC100537860	97.9837488704452	4.67278	1.54682263886263e-16
406637	mre11a	340.126530590467	-2.32598	1.57170972670398e-16
407696	ddx52	1439.06951883172	-1.89191	1.58846523478018e-16
767738	abi1b	1852.8903559818	-2.61565	1.6046597346686e-16
553485	rnaset2l	2192.46177403489	-3.98284	1.60598022178796e-16
445401	cenpl	214.86975198939	-1.93248	1.61501452214623e-16
555957	ephb3b	123.295658976219	4.17234	1.66822926110102e-16
393940	atp2a2a	3115.22886079393	3.5766	1.83015295405506e-16
556277	cblb	801.13176402318	-2.74215	1.84428293221162e-16
336888	susd6	9554.35897433915	2.5647	1.87430056070539e-16
566185	caspbl	327.495069021784	-3.72143	1.92634750444473e-16
557652	si:dkeyp-27c8.2	2914.03789563484	2.47449	1.97473298213523e-16
335236	ndc1	1431.08708981	-1.93429	2.0702923275555e-16
325106	utp15	3004.86528082527	-1.68763	2.14735596245092e-16
101884620	LOC101884620	318.005155522412	4.90937	2.1759868254296e-16
558940	sacm1la	4255.18505650671	2.18067	2.24604552500766e-16
792693	cd3eap	1021.67736665282	-2.23422	2.2605857701032e-16
793937	agtrap	765.767200234778	1.82909	2.39099830734021e-16
321056	zgc:63569	649.430552848105	3.58749	2.40967872918237e-16
541348	bccip	2900.75829537484	-1.84315	2.49173243216114e-16
393664	tuba8l2	11074.4919105406	-2.46691	2.52233451441126e-16
492796	zgc:101663	1016.4905078594	1.69489	2.57118276445789e-16
407681	foxf2a	172.510428478992	4.68057	2.66428510835402e-16
406816	cul1b	7095.20089452068	1.87404	2.66428510835402e-16
559087	pla2g4ab	70.4427019489942	-3.17831	2.70917129006523e-16
564127	foxp1a	1278.1632125522	-2.1908	2.71792151963341e-16
559351	trim35-28	3138.12249287015	1.96177	2.72461079121755e-16
415183	tubd1	95.7388876312612	2.71815	2.73368631443627e-16
560447	LOC560447	3071.10075961175	-3.47092	2.75703396339424e-16
406259	hprt1	1031.67331105758	-1.92778	2.83671387734517e-16
323922	dnaja1	5088.49982126413	2.24919	2.86427576648518e-16
336470	pak1ip1	1760.26427632177	-1.85542	2.87123282635769e-16
563803	ccr12a	2684.80097547552	-3.51141	3.05303261863402e-16
100007383	dicp1.1	198.278870638229	-3.57179	3.05487980514685e-16
387000	slc25a37	616.624706608608	2.64432	3.21390363379134e-16
556456	pold1	800.82229434488	-1.92632	3.28081095403803e-16
335625	adcyap1b	277.280093505762	3.24245	3.32632824743101e-16
557826	tmem145	715.253650950758	2.89665	3.32632824743101e-16
337179	mmp2	890.702779230967	-3.21805	3.36931976882986e-16
322508	h1fx	4760.86470765249	-1.74439	3.45472576891573e-16
445178	aarsd1	306.968797348857	-1.66069	3.5092756205732e-16
58120	nme6	240.399912231842	-1.6605	3.5092756205732e-16
799208	zgc:194627	234.375540994042	-2.68098	3.62728295096747e-16
100331810	LOC100331810	237.279387709784	-3.89182	3.69532375166497e-16
393839	scp2a	1120.11810893135	-1.45642	3.84020732590514e-16
565945	si:ch211-255g12.8	1243.87485235125	2.47208	3.92327824404804e-16
386632	ddx49	1798.94042899685	-1.4946	3.92327824404804e-16
557196	slc24a3	1060.13414893503	-3.25127	4.11245030980189e-16
326846	cnbpa	15000.809741549	-1.7703	4.37762800952194e-16
101882856	LOC101882856	128.416921519393	-8.92972	4.71582304002142e-16
100334190	si:ch73-376l24.6	1057.82110020572	-2.06609	4.74064455993313e-16
327590	tk1	764.331335194972	-2.5552	4.7852323474939e-16
192320	pole2	413.021425528162	-2.67331	4.79650218006549e-16
100003674	si:ch73-31d8.2	400.248073624943	-4.83564	4.88213484544361e-16
110439249	LOC110439249	53.8276932051493	6.48704	5.17921972122321e-16
386707	fen1	3261.69528414854	-1.94281	5.33036962126325e-16
393762	si:ch73-141c7.1	600.326439841249	2.8666	5.35390289194388e-16
368439	mycbp2	610.998960283317	1.63162	5.35390289194388e-16
321133	nop14	520.12058404273	-1.49104	5.42336071189607e-16
796551	tert	445.838377437304	-1.97857	5.78908853500185e-16
393902	rab7	3583.35200084581	2.08124	5.89737904106473e-16
641495	poglut1	537.289649540307	-2.04875	6.04210668343911e-16
406635	sgsm3	563.255299218366	2.56427	6.42224659701318e-16
100537724	si:dkey-102m7.3	357.361296496196	-1.83146	6.47837849665234e-16
30098	hhex	1453.56432897281	-2.8731	6.65390477318561e-16
405818	cyyr1	4207.11904577968	-1.18655	6.84525157460479e-16
556360	stim1a	10741.2961954936	1.212	6.979911695614e-16
558801	fezf1	198.515666001754	3.75423	7.25675069056832e-16
108179692	LOC108179692	22250.4475587513	1.83103	7.31679651997916e-16
415170	slc12a2	2972.78953967597	-2.69771	7.38914572951906e-16
100333504	lamtor5	4469.91224216276	1.7799	7.44498744450161e-16
321652	wdr12	1466.84491521055	-1.68859	7.55622380750935e-16
101883079	LOC101883079	138.997972723168	-3.01782	7.73746991841443e-16
563613	eif2b5	1607.1576801525	-1.39961	8.04855804924966e-16
541421	pop5	397.220490069012	-2.86112	8.51408650456635e-16
100003787	nhp2	3763.93409872528	-2.13042	9.06064590910233e-16
100150092	si:ch73-226l13.2	716.439219285095	4.93703	9.20989567185335e-16
569071	ptprh	53.113462948572	9.25088	9.27004519949375e-16
326906	suv39h1b	920.502393215355	-2.57955	9.42778163837319e-16
393915	rabgef1l	286.142503601301	2.11659	1.01454763506319e-15
393135	zgc:55621	93.4919816701429	7.29908	1.04971741901702e-15
560338	elp2	1203.1661167381	-1.54306	1.07753327830206e-15
414329	rap2b	5356.48948965211	1.65943	1.08479953654227e-15
406727	nudt1	261.571044638764	-1.71829	1.13402055108249e-15
569665	pdik1l	497.085504106859	-2.20675	1.15976523721157e-15
322000	anp32b	9876.90233235978	-1.93728	1.17100311752069e-15
550234	exosc2	1019.07369091018	-2.38732	1.20151015939422e-15
556779	ksr1b	2968.63110686118	1.87851	1.26826367623146e-15
394040	surf6	1715.37464508982	-2.05316	1.27558955068605e-15
541491	pvrl3b	70.5043660423669	4.26362	1.2938943257281e-15
322854	anapc5	816.445948280616	-1.69244	1.31513658714273e-15
58118	bdnf	72.0871684835992	2.86818	1.32314868469538e-15
797867	carkd	7468.39214404702	1.45211	1.34274599590871e-15
406265	agpat4	8791.69397009189	1.83488	1.4454760189836e-15
797949	LOC797949	2085.57096296736	-2.66086	1.47711761330897e-15
368433	inppl1b	77.9978870917973	-3.52503	1.49007421642484e-15
567366	prr11	628.80586360513	-1.85814	1.4950648100024e-15
570828	mgat3b	1096.90120468415	1.80129	1.52272452470234e-15
497376	kntc1	568.52355168585	-1.55966	1.57392640661651e-15
794348	nrde2	236.958354725239	-2.02512	1.59023865762975e-15
561279	pdzd8	1608.75619083817	2.2931	1.59546412466309e-15
100884153	dicp3.3	13594.2698402658	1.69396	1.63688234345602e-15
100001136	si:ch73-61d6.3	276.379902022712	2.69601	1.65486900124758e-15
550523	stoml3b	17666.5932628433	1.57733	1.66699533175215e-15
100037359	rgs13	1405.66443950708	-2.53682	1.6880346838269e-15
110438398	LOC110438398	245.573728870838	-2.92938	1.7344655461993e-15
100000686	zgc:171601	523.946319984769	1.95929	1.75088531754902e-15
393255	slc46a1	547.727929361108	-1.89978	1.85891272355461e-15
404040	dab2	122.813041433399	-2.44169	1.97940800239143e-15
100000577	ppp1r14bb	3337.12610533056	-1.74576	1.97940800239143e-15
797731	irgf3	162.944750347361	2.88414	2.00567112215779e-15
402808	rrp9	651.824725350298	-1.85227	2.0873356817054e-15
504044	st3gal4	1270.91800795523	-1.9944	2.11998540446548e-15
321745	wdr36	3063.02929831898	-1.87706	2.15105880301074e-15
406860	ipo9	697.56832556333	-1.7627	2.15197126955675e-15
450061	gins1	378.753612561603	-2.06604	2.15554448007892e-15
373884	cecr1a	2477.90838232491	-1.84932	2.23091189015447e-15
541478	sorbs3	250.987772055236	-3.00591	2.288689395131e-15
108180802	LOC108180802	167.096459727762	3.91321	2.32695823299157e-15
404211	pik3r2	334.145742082702	-2.63055	2.41635461508927e-15
566820	rnf38	3077.03239500929	1.53679	2.63100679322041e-15
101886537	LOC101886537	151.683625410137	-3.57434	2.65868852448803e-15
103911521	LOC103911521	49.912929139946	5.26624	2.66902828198783e-15
415244	ap3m2	3297.54265791585	1.47712	2.75313265969168e-15
393257	polr3d	590.714549743808	-1.6627	2.82325278806371e-15
492783	dhrs13a.3	803.399312828166	-1.4854	2.82900766403322e-15
566376	zgc:172136	352.439227419538	5.43131	2.83905762441098e-15
100333127	rexo4	981.973305298243	-1.66487	2.91215340888289e-15
541488	tcp11l1	889.919956761911	1.54967	3.09708874588839e-15
373081	mvp	5206.06916065607	1.36573	3.11116078714379e-15
553029	rad50	728.129835202111	-2.07056	3.23480666081396e-15
555345	ccdc13	66.9683131895499	7.11213	3.44204300862281e-15
559568	tbkbp1	120.067031161935	6.09076	3.5216300034946e-15
373866	cbr1	370.928319923578	-1.84769	3.52778452818426e-15
556206	slc43a3b	473.171338595201	-2.96848	3.69612373460283e-15
550265	zgc:110286	89.8001518846957	3.66423	3.77176428747244e-15
563907	antxr1c	264.659634537402	-3.1066	3.77598600614256e-15
100003922	p2ry1	200.431883798974	-3.4509	3.77598600614256e-15
30183	acvr1ba	4048.99433553273	2.01901	3.77598600614256e-15
336518	polr3e	3850.2564796582	-1.64735	3.82127155113275e-15
569828	rgs16	76.4895641490471	6.58911	3.82900572751761e-15
571845	siva1	702.741488792129	-2.88534	3.86798813171464e-15
567286	gdpd3b	66.2644150298075	3.70148	3.97593231076047e-15
325603	polr1b	271.579244959603	-2.3411	4.06650705299115e-15
110437825	LOC110437825	458.505096178112	-3.08883	4.09282971803564e-15
100005387	rnaseh2c	815.757730204318	-2.15387	4.09782228633344e-15
100330897	slc2a3b	2313.73607232126	2.24983	4.15582801238379e-15
553351	clcn7	24089.2129578452	2.09808	4.19609893641098e-15
449548	ppp2r1bb	12353.2255907454	1.25556	4.203463252625e-15
557247	btbd10b	3298.20275407924	1.22151	4.20992266754764e-15
568671	atp2a3	5658.10781286755	2.80771	4.4364975720149e-15
799483	si:ch211-251j10.3	802.933119210657	3.98109	4.44971229557305e-15
561518	si:ch211-120p12.3	2167.75372928549	3.19389	4.44971229557305e-15
108182910	LOC108182910	115.740930108395	-2.44285	4.52648364214337e-15
101883560	LOC101883560	208.140040291728	2.85654	4.59241702002472e-15
386613	pdca	115.305237596542	3.84967	4.71452129822257e-15
100150119	si:cabz01007802.1	504.339029026069	3.51327	4.82623653411221e-15
407714	zp3a.1	110.180240194251	8.85683	4.84631651828726e-15
100002462	wu:fi42e03	286.583323078756	-3.14472	5.04703441620414e-15
795679	si:dkey-42l23.2	186.236231437801	-3.1074	5.08154538912323e-15
497183	grhpra	442.630133669375	-2.45544	5.21667836297192e-15
572452	bmp1a	184.126791722713	4.85646	5.29820890691528e-15
568159	ago3b	1662.50204493948	2.29463	5.29820890691528e-15
100318936	rasa3	812.618146021307	-1.73762	5.41586156939876e-15
541444	nmd3	1772.89798228513	-1.62821	5.64216647463171e-15
492520	pgrmc1	1705.22487973556	-1.55353	5.6485582381826e-15
100148988	kalrna	60.071079330816	4.30583	5.7227654791692e-15
402878	mpp6a	585.996463705186	-2.25554	5.73831437227523e-15
554509	orc1	264.809360384904	-2.24475	5.80548430522249e-15
558571	gramd4a	82.4128774786773	7.1149	5.89830787774883e-15
557810	mapk12b	6545.43184697481	1.80206	6.16072056696011e-15
100332241	tespa1	1210.05471882988	2.27971	6.55034819041443e-15
192316	terfa	1787.86825539837	-1.50226	6.94531783471385e-15
567657	arl15a	85.1024693952365	2.40655	7.17599116138916e-15
492350	s1pr5a	360.038877320268	-3.56338	7.19234443475626e-15
567039	cdc42bpb	305.358237234928	3.12978	7.24002452439845e-15
378720	ical1	637.883530120176	1.26964	7.46566648603178e-15
492813	fut9b	625.045347497981	-2.88127	7.8744820002336e-15
65226	rpa2	2947.42234906761	-1.87025	7.91344542260981e-15
550402	arf4b	286.129903747216	2.78201	7.98476512984038e-15
100333229	kiaa0101	1504.73940923061	-2.80277	8.09388805880125e-15
449806	fbln5	132.824943576321	6.55106	8.15033484748522e-15
393222	ttll12	641.484603979323	-2.14323	8.33537864737762e-15
100001258	si:dkey-96n2.3	380.896554495326	3.29633	8.79086393702444e-15
559752	slc22a18	468.068820018243	-1.78523	8.97788148990404e-15
768177	deptor	1202.68194594787	-2.93398	9.11356045881528e-15
565964	sdr42e1	344.342321347016	-2.35027	9.29986566215995e-15
570321	si:dkeyp-117h8.2	208.687471232335	3.75886	9.50883664680197e-15
445322	chst10	995.456963224055	1.05081	9.58875683457377e-15
101886905	LOC101886905	217.220163626838	-2.19404	9.96952345704383e-15
100537160	arhgef5	1621.82503652762	-1.57975	1.02085967918837e-14
322513	uap1	4245.14850822644	1.88253	1.04726368769327e-14
555906	ppargc1b	9382.60074517249	2.12855	1.06153076246216e-14
406369	prpsap2	4060.59144929185	-1.33479	1.07184411116107e-14
405822	pgm2	2188.80198802454	1.91237	1.10421049138428e-14
553415	rhobtb2a	285.996427513733	2.33442	1.10425494481908e-14
393291	rbm28	2079.95099694887	-1.25789	1.11477626630552e-14
553616	nip7	1506.56412692987	-2.1976	1.17567712770545e-14
100536790	LOC100536790	94.5472717033554	5.66455	1.22265302612609e-14
571044	si:dkey-201c1.2	2104.66793190492	-2.76413	1.24436831520748e-14
322715	dus1l	753.929616202628	-1.49498	1.31460416373982e-14
393162	chek1	294.016463931536	-2.80521	1.34803380086292e-14
335901	klf15	203.987488146626	-2.60044	1.3488216700767e-14
565859	asap1b	994.252244888302	-3.97424	1.36624831236603e-14
393946	gnai1	29068.5289298786	1.55329	1.36830530431563e-14
406462	orc4	1129.52041654853	-2.18526	1.41992957380607e-14
497649	tcf7	118.833104499901	4.68771	1.42207544427938e-14
101884146	LOC101884146	996.742107206429	-2.53002	1.43868554769649e-14
798497	msantd1	185.705672837924	-2.07876	1.45356914318154e-14
30725	chrna1	1446.76838792978	1.37721	1.46989410180744e-14
445153	itsn2b	847.079485177123	1.97754	1.49283466416052e-14
447908	osbpl3a	175.044684732672	3.20865	1.52358680968202e-14
767660	tank	2906.85976328705	1.96024	1.53546094175429e-14
447855	cratb	401.753050177791	-2.37152	1.55159780654314e-14
557239	antxr2a	10835.1405907613	2.06656	1.5662073113037e-14
323269	zbtb16a	2532.54441074237	-2.11209	1.64387231589652e-14
571706	zmp:0000000926	172.553492679581	-4.76058	1.64772975872177e-14
572146	cdk14	312.028858718612	-2.41117	1.65758973018067e-14
767797	utp18	621.544822438654	-2.04064	1.68448402522955e-14
100535079	LOC100535079	96.0447959178244	-3.31023	1.69861288667524e-14
553462	ddx24	1051.23083626518	-1.91846	1.70803326002922e-14
407665	sccpdhb	1304.78828127896	-1.618	1.73375354924577e-14
566552	si:ch211-241j12.3	117.472432339541	2.88565	1.73428531659315e-14
393882	tubg1	2917.24786086579	-1.23261	1.73626614134979e-14
324910	sema7a	289.786775832561	-2.51753	1.76800040905465e-14
445275	sdf2l1	9025.53170116618	1.93184	1.81544367159416e-14
565287	daglb	5358.87801024224	2.01363	1.892098650747e-14
368620	abcc4	3693.54627577319	2.57052	1.92914709019972e-14
317639	tsr2	1613.00130850628	-1.9637	2.11907814301215e-14
550445	acta1a	542.421759046177	4.07302	2.16933679337128e-14
641492	sh3d21	908.583351415367	-2.3206	2.20868453501694e-14
561376	pus7l	109.009800800475	-2.26043	2.21899177015857e-14
563346	capn5a	259.060801321499	-2.5352	2.28737584161781e-14
100534664	si:ch211-153f2.3	75.9805332318232	3.4712	2.28924487583964e-14
100318335	anapc2	923.791163266908	-2.13798	2.30885134600883e-14
100003642	si:dkey-246g23.2	338.119407397965	-3.61917	2.32501065448903e-14
641415	zgc:123107	472.743966295596	-3.26656	2.33872944840752e-14
402795	sts	161.071985133358	2.27287	2.37692918744213e-14
321868	ilf3b	18699.8775269106	0.980156	2.42630640669128e-14
100536983	LOC100536983	1540.53369439688	3.68822	2.42967279971261e-14
571530	si:dkey-21a6.5	1101.12587625707	2.45807	2.42967279971261e-14
100329583	si:dkey-211e20.10	1009.42875193394	1.37942	2.47744417993856e-14
393970	acy1	1461.30142011531	-1.30225	2.49716681452374e-14
100007087	si:dkey-23i12.7	392.558061330141	2.74429	2.58665595538925e-14
334529	aqp7	3505.63556053038	-2.03024	2.63400339507001e-14
100151335	LOC100151335	2030.82268248271	-3.39178	2.65020781488104e-14
550224	lhfpl2b	263.949724545669	2.31415	2.80166228080176e-14
65230	ctbp2a	761.837250178673	3.59724	2.81604402910345e-14
566945	mmp14b	3156.15081420059	2.25412	2.81721659022476e-14
556735	LOC556735	171.941231378105	3.11562	2.90722326857234e-14
437001	adck3	1203.12205336925	-3.01877	2.95300997234763e-14
566459	myo1cb	547.072636886144	-2.24063	3.10820820146334e-14
101886857	si:dkey-288a3.2	47.0342619274405	9.07721	3.16233630039392e-14
402833	camsap1a	202.951314193071	2.68585	3.17610829490538e-14
449616	bcl9	2344.97780001478	2.43611	3.31197713080246e-14
100535718	pdgfd	127.019812244898	-3.59804	3.3603789202743e-14
100151629	tnfrsf9b	264.353885532167	3.1858	3.4171003253084e-14
768152	ube2t	316.045800056027	-2.81334	3.42246487696449e-14
550247	exosc7	862.87246788985	-2.3459	3.63227684456996e-14
792319	saga	149.275771345383	1.94286	3.68223566473898e-14
550447	osgep	805.326340299483	-1.6049	3.77001274916235e-14
100093702	si:dkey-121a9.3	1068.16558829807	1.75745	3.8894717668342e-14
100536838	zbtb47b	48.9796160756875	-3.63391	3.90882520641515e-14
402904	nit2	847.388470651301	-1.52206	3.91500261706196e-14
445395	esco2	1131.46310869574	-2.72591	4.033259638466e-14
559679	ptprja	8838.1981980141	2.2952	4.08806068151896e-14
568826	si:ch211-266i6.3	442.338777515451	-2.18713	4.23000538412734e-14
402955	thumpd1	1865.44263960562	-1.67171	4.2577336325402e-14
393544	psmd3	25890.5358353506	1.501	4.26028661123543e-14
503884	fxyd1	2275.75156596109	-2.51811	4.35784670783724e-14
65227	rgl2	4287.74723804957	2.45408	4.3983909192996e-14
406571	cirh1a	2871.78394125987	-1.83141	4.3983909192996e-14
442931	gins3	306.942687938924	-2.38858	4.3983909192996e-14
368275	ppm1g	4746.59971112483	-1.15642	4.54779426156578e-14
100534830	LOC100534830	618.110243026616	3.55314	4.56877189246009e-14
560933	pvrl2l	1241.95106831732	1.89735	4.64956411523165e-14
567027	mbnl3	952.570649376529	-1.72041	4.7585336892432e-14
405867	crls1	796.446131025697	-1.95162	4.94064553508929e-14
555531	si:ch211-152p11.4	558.005333599363	1.66744	4.95021141088298e-14
286777	ddx54	1516.72928161228	-1.86496	5.03974499663838e-14
101885830	LOC101885830	3961.29786740026	-2.22995	5.22275171688412e-14
558814	haus6	874.847878937404	-1.5231	5.45992672454905e-14
436749	polr3h	1258.17872183187	-2.34352	5.58476994509313e-14
407677	lrrfip1a	1023.99297941376	1.75239	5.67660216568008e-14
83414	ssr2	19553.0856282371	1.42026	5.92631588607076e-14
561073	zgc:194981	597.869374330193	-2.12645	5.98094647354542e-14
569805	mdc1	490.252106923514	-3.13068	6.00247062535027e-14
110440171	LOC110440171	410.34401953563	-1.94017	6.39589951697022e-14
336619	eif4bb	2991.93090391391	-1.13381	6.87751641711903e-14
794946	si:dkey-18p12.4	93.9126655191661	-5.47475	7.25849318409391e-14
100535879	LOC100535879	1549.8515666547	-1.81974	7.25849318409391e-14
570749	si:ch211-264f5.2	11267.5578715554	3.00888	7.25849318409391e-14
564147	glsa	1675.1397704523	1.70461	7.25849318409391e-14
100006636	si:ch211-216p19.6	114.614227269525	2.05423	8.01005721083521e-14
101886860	LOC101886860	875.004612698605	2.01092	8.23739282031019e-14
100913078	fcho1	267.596256086517	-2.85532	8.39625758579647e-14
368489	fam101a	39.9646120178026	6.08391	9.14509099075219e-14
553728	ttc38	135.706611265973	-2.68158	9.25690184929578e-14
548604	nr4a3	2787.49326810616	-4.34101	9.49866327638624e-14
445239	gpn1	838.669557703187	-1.71419	9.52131631136532e-14
326746	cbx1a	122.22249243106	-2.95614	9.88853754546826e-14
378847	mtr	422.413928296299	-2.45253	1.03020750988188e-13
563577	ppp1r13ba	364.842915295903	-3.07016	1.03857287195144e-13
563353	si:ch211-106n13.3	46.617739734208	-4.23354	1.068602089458e-13
394011	vti1b	2493.35333982415	1.34382	1.08488017846293e-13
100005628	si:dkey-191c17.2	49.7930797129281	9.15594	1.13532660408729e-13
100002141	LOC100002141	177.044140731031	-3.19204	1.1403313376515e-13
406516	khdrbs1b	6571.39382699347	-1.08439	1.15055664742132e-13
64256	efna5a	461.538726063638	-2.46872	1.15242720615085e-13
100329632	scarf2	118.018330552424	-3.55713	1.17672407936254e-13
321193	paics	867.093771146373	-1.36064	1.19773049269145e-13
553608	tbl1xr1a	1890.96780107282	-1.88268	1.2132352753007e-13
100073333	mon1a	661.400710418051	2.32983	1.2132352753007e-13
195817	lmnl3	191.039391229767	-2.90724	1.23613819207065e-13
100001663	si:dkey-32e6.3	1551.05140674549	1.65992	1.27145393552876e-13
368900	pcgf1	338.911274513343	-1.56773	1.30813454547059e-13
564388	tut1	828.107574338394	-1.54003	1.3096625979551e-13
562530	si:ch73-103b11.2	1048.51983029968	-3.39979	1.3116989820146e-13
405856	wrnip1	126.464354007445	-3.55974	1.31349947411634e-13
557091	wnk4b	246.03822204362	4.77891	1.34686401093281e-13
436586	ccm2	1810.15026033889	2.64573	1.38499383564071e-13
402797	sycp1	202.706861668839	2.39813	1.42005768104354e-13
323089	ctdspl2b	952.857201997624	-2.17023	1.42401512645934e-13
561000	LOC561000	551.6712460822	-2.63403	1.44052385819817e-13
100537934	ap5z1	2373.70523903227	1.23816	1.44054488862341e-13
557999	tdrd5	42.751480777554	-3.95152	1.44253333998237e-13
58141	gart	1027.19264185744	-1.54513	1.4825864700744e-13
406768	zgc:55262	1479.79226669486	-2.08309	1.49055600015704e-13
100535215	pogza	796.693070910332	-3.43861	1.55056654277079e-13
559270	slc1a6	63.7185356709154	8.79021	1.5546870717474e-13
565473	prdm11	1011.24793420181	-1.46955	1.564944223362e-13
100856806	gb:bc139872	4864.22651271361	2.22681	1.59134951501186e-13
100150889	tapbpl	629.105232782915	2.50212	1.70685255380605e-13
799901	reep1	79.0871280942191	4.47859	1.70993568787465e-13
567649	arhgef10lb	96.4578693423879	-4.16999	1.75100937334675e-13
406587	rpf2	3256.92527627456	-1.70345	1.76136805341658e-13
322089	ctps1a	3386.04972361871	-1.89423	1.82249588070426e-13
110439959	LOC110439959	114.081406432069	-4.05876	1.85472130266953e-13
100007521	socs1b	87.3202407036089	4.62543	1.87665878147016e-13
100001648	tmem199	2127.97377740545	1.5131	1.88569627163354e-13
100151075	abca5	425.378674977364	-2.22972	1.89057575540906e-13
100009657	rps6ka3b	778.509709152599	2.16797	1.89302554040498e-13
100534720	isg20	1201.36839154438	-1.34769	1.89302554040498e-13
678537	xkr9	208.748689880823	3.31764	1.91750856381162e-13
561496	nuak1b	313.793055188205	2.03497	1.93090560792708e-13
378718	drd2l	71.2754495991836	3.24339	1.96254641514859e-13
556950	ppm1j	3374.08953617216	2.24713	2.0264329858951e-13
286745	ddx55	616.953272623276	-1.73261	2.07815861138727e-13
402819	cnpy1	3264.03250820651	1.69557	2.08430757636383e-13
563746	traf7	5536.59986152708	1.89009	2.09852775459964e-13
768164	rgs18	2567.62174273135	-2.98629	2.12271586802236e-13
100007503	LOC100007503	552.410607505042	-1.6642	2.12373152902437e-13
337172	cpn1	667.741569768103	-2.15605	2.14107256726463e-13
573145	khsrp	3707.33380337647	-1.45242	2.19183038458461e-13
768182	mcu	696.637369942876	-1.5328	2.23291384448138e-13
767657	abhd12	1353.15426669367	-2.11322	2.32123000812388e-13
573988	kif15	810.542048888789	-2.02959	2.39964623828562e-13
566166	zgc:136564	261.177329192199	-2.53805	2.43904633019475e-13
503709	pqlc2	3525.8920440918	1.94308	2.49208794164339e-13
447821	sav1	2346.96290878769	1.26706	2.4948828228969e-13
322160	pdia6	37721.5347609658	2.28813	2.523535472592e-13
100192219	gch1	269.849726100278	5.10333	2.58392730408106e-13
406468	dhdds	2701.72296970569	1.58467	2.59148290223078e-13
100150997	adora1b	53.763323431185	8.54542	2.62333068117871e-13
406805	nvl	701.906404142023	-2.31327	2.67661968793624e-13
568195	napbb	135.327528766801	2.55121	2.70075066984981e-13
445139	bag3	110.02147858578	2.11963	2.73271984075616e-13
494048	tspan5b	1047.19300794708	1.68989	2.8770612209547e-13
794481	zgc:174972	288.028433877665	-1.94875	2.94610840829226e-13
103908820	LOC103908820	53.4925406422199	-4.72967	2.99522498764325e-13
58098	arntl1a	2312.47507636828	-1.11231	3.09643533356451e-13
393281	ctage5	4296.35397908386	1.69743	3.10220755100312e-13
100332622	spata5	207.256821570411	-2.51682	3.10600746045244e-13
327124	lrwd1	264.481944320469	-3.21086	3.40310428535633e-13
436964	gpr137	550.050908995306	1.5764	3.64815386136413e-13
566523	arhgap27l	160.136354445507	-2.95097	3.78378866653296e-13
407984	thrap3b	6713.90094403428	-1.02713	3.80930241609678e-13
447844	slc35b1	8509.73304960278	2.10529	3.91071375550746e-13
795469	ccl19b	78.5952703577896	8.37734	3.99792546723009e-13
105665598	pigrl3.5	185.117021434793	-3.93545	4.0216804570488e-13
100073328	slc38a3a	60.5622111251133	7.02101	4.06174671767347e-13
334101	eci1	1390.05368484148	-1.83537	4.21672392383728e-13
100537120	ppef2a	1694.14138186774	-2.26073	4.23524685226808e-13
570573	tpra1	1250.36408954322	1.84656	4.27864523866369e-13
334121	hacd2	2784.4218910652	-1.19468	4.54523476110464e-13
569395	npr3	39.2987074411883	5.99579	4.58025540063551e-13
406319	snn	1087.57560735105	2.15527	4.7118866187867e-13
334983	wu:fa11c10	4739.7738913611	2.24767	4.78215042535536e-13
101886542	cmtm8a	37.5500984238137	-3.59829	5.11805614116621e-13
554650	bnip3lb	7813.4567312578	1.89441	5.36118913082876e-13
550271	gemin2	1102.64437106746	-1.54066	5.41140199667386e-13
100329613	hcar1-4	208.352956316391	2.04964	5.45415317421902e-13
492340	cln3	1415.72480545177	-1.74516	5.62103409068689e-13
556493	ncapd3	232.80824563168	-2.12851	5.6402571638142e-13
402885	sh3glb2a	198.800453876967	2.19711	5.66906493821769e-13
30101	skia	2042.45097933652	-1.77944	5.68807376212604e-13
556236	acacb	603.340668276145	-1.86246	5.69045168150762e-13
100334565	si:dkey-288i20.2	37.4947872701308	5.51159	6.04332784970533e-13
100034473	atxn10	254.560245852222	-3.21182	6.25014905024215e-13
327294	gatsl2	2591.98306317328	1.71532	6.31808705366506e-13
503946	fhod1	141.136588926742	2.64207	6.37207678557775e-13
557200	limch1b	51.4588178819959	3.73476	6.51763382138501e-13
565315	slc6a15	378.038391023445	-1.94038	6.56080958941972e-13
436727	gtpbp10	943.546049478802	-1.32437	6.64446644830335e-13
548603	snx18b	35.7601319754131	5.18894	6.67376323389315e-13
768188	zgc:154125	1476.2797078349	-3.20679	6.75411706884574e-13
571249	arid3b	8706.55511586129	2.01246	6.92340174003506e-13
572325	dym	470.428138592212	1.52728	6.98324275640988e-13
402998	plxnd1	2683.66020367777	-2.07377	7.03297804866104e-13
436633	slc25a40	591.347462350381	-1.35363	7.03653842005703e-13
100535934	si:ch73-158p21.2	1547.30593928004	-2.77709	7.05823571917686e-13
554842	acot11a	133.760363881116	-2.5292	7.12096629734553e-13
566847	pot1	206.36597284576	-3.37335	7.27652662942494e-13
80939	papss2b	6958.81484363877	1.56142	7.49944816128123e-13
561406	ptgir	513.998519063129	-1.91117	7.80659867615369e-13
100526683	aldh1l1	330.36017300237	-1.95056	8.02152418882194e-13
100007463	tle3b	3154.66915999451	-2.77743	8.0838915906893e-13
337046	ranbp1	10021.0317446524	-1.51549	8.34237730061826e-13
445197	fam219aa	571.704925922049	1.98125	8.63460842072338e-13
553634	casp7	3217.2483538886	1.57514	8.68928296756269e-13
368390	plk4	743.191354209545	-1.5126	8.68928296756269e-13
562137	slc38a9	367.191742415676	1.61804	8.7956810381716e-13
100003049	dus2	1710.75690572342	-1.65599	8.80149209740184e-13
562786	si:dkeyp-94b4.1	281.585042095967	1.62709	8.85174632086438e-13
565314	cdan1	218.436963345433	-2.14683	9.01106814610846e-13
393391	tpst2	2994.30806133594	-2.9503	9.07363750680642e-13
556846	si:ch73-311h14.2	409.739777643692	-1.22563	9.08031537175146e-13
550514	utp23	1510.9478224217	-1.26348	9.40955304427909e-13
101883669	si:ch211-194m7.5	46.93276225762	4.89072	9.50805091945306e-13
108179036	LOC108179036	624.188952326381	3.2856	9.57320817479567e-13
393196	rpa3	1152.41956494351	-2.23433	9.57320817479567e-13
563388	si:dkeyp-72e1.9	40.9202354977313	5.17551	9.59381810224249e-13
571252	adam19b	1414.36225948919	4.31275	9.59381810224249e-13
565172	map7d1a	206.259737109608	2.96749	9.65967940365357e-13
322059	pola2	793.389695345995	-2.47108	9.82563241801965e-13
100536757	LOC100536757	101.180107861374	-3.50548	9.96311585157036e-13
103911115	LOC103911115	48.7637247218688	6.058	1.07344330578831e-12
337572	ctss2.2	13209.5496249423	-1.8397	1.12721555550384e-12
402823	bxdc2	3506.78263991007	-1.79415	1.12721555550384e-12
101883708	LOC101883708	35253.6539041827	2.33207	1.14412642418522e-12
386844	ssrp1a	678.400237300177	-1.59868	1.16182597248658e-12
393461	gmds	1764.45160814576	1.20627	1.17797611111891e-12
449662	acox1	2613.61041507214	-1.2628	1.22962254953596e-12
100150488	lrch2	79.0310297019334	-2.44532	1.28689379863932e-12
797513	b3gnt2l	4494.57216448122	-2.32356	1.50180976056814e-12
100005846	si:dkey-56f14.7	2006.49498397727	-1.98579	1.5097530022701e-12
561960	si:dkey-229e3.2	618.180932755489	-1.67637	1.51946197787051e-12
793871	desi1b	138.533737643375	2.43465	1.52104501043374e-12
110438240	LOC110438240	174.977752685835	-2.39969	1.55484055694222e-12
553950	rnf130	4625.60883032773	-1.68331	1.5580539185444e-12
101885447	cntrob	194.861885289967	-2.37143	1.56585762486849e-12
325084	src	122.953023549774	2.97704	1.56821118100084e-12
324340	cyp3c1	9104.05549924491	1.29631	1.60592401798217e-12
323723	dnmt3bb.3	78.662198622577	-3.08807	1.60843186930087e-12
335495	parp3	1181.16687565622	-1.7186	1.64910946805774e-12
393317	diabloa	403.256048671488	-1.77646	1.65033641426612e-12
387255	rbm19	195.403993429107	-1.97707	1.66785150195263e-12
30677	tpst1	3535.64589048221	1.55067	1.669898499108e-12
100331155	chpfa	661.777317576308	2.15873	1.76642815809849e-12
100150288	elovl6l	143.200184101865	-2.81467	1.76642815809849e-12
323659	asph	2940.19984232915	-1.72425	1.78525280051257e-12
336695	samsn1a	70278.0999832981	1.36257	1.79104017730684e-12
561288	grk6	1418.92430717573	1.67939	1.79104017730684e-12
561208	tmem41b	1926.88686836795	2.23834	1.79992621524111e-12
30172	nup93	1728.75017689789	-1.06822	1.80037872363741e-12
799686	dock11	1660.32614015681	2.12182	1.8123029590059e-12
100331439	slc29a1b	3404.66618609913	-2.56854	1.83470270467489e-12
405832	rffl	2799.8270776263	1.3535	1.87724024615241e-12
563181	map2k2a	2075.68012133965	-1.63384	1.9135995681233e-12
100004095	si:ch73-90p23.1	13356.4149192508	3.47972	1.9193178344979e-12
321700	nol11	3408.62722826643	-1.37728	1.96158650147699e-12
449829	galk1	6500.30896762448	-1.74378	1.99212587265705e-12
327348	znf710a	428.386348931752	-2.99945	1.9950765127372e-12
335231	fbp1a	363.00241565633	-2.0675	2.00181547368783e-12
566981	si:dkey-3k20.4	68.8843818120736	-3.3602	2.06380593868628e-12
108179181	LOC108179181	31.8567970021199	8.51469	2.16060055625174e-12
393386	cybb	84550.1574298337	2.13541	2.20147965999484e-12
566787	cdt1	663.84726400186	-1.86866	2.21824500943159e-12
110438329	LOC110438329	97.8330766281522	2.9228	2.25029731867027e-12
100330721	axl	4244.9255319856	-2.81297	2.25554135315908e-12
321544	prpf19	7880.42512857891	-1.04647	2.300456314172e-12
557028	igf2bp2b	430.270823165623	-1.28982	2.30996488993579e-12
321277	mybbp1a	2005.84347517013	-1.97221	2.39943630195389e-12
406344	tram2	2366.20848925237	1.7148	2.43393442340575e-12
561039	elp1	818.035257066207	-2.24673	2.43505733853068e-12
30086	nme7	669.594895442659	-1.51907	2.44123653592617e-12
393632	mlh1	156.625954687667	-2.36743	2.56243518265531e-12
110437749	LOC110437749	31.549209212413	8.50133	2.57907033715289e-12
100141368	waplb	682.650474864236	2.40065	2.58288425646394e-12
794255	c3ar1	2420.11091271302	2.28892	2.59972771482e-12
393647	dus3l	1368.1159770123	-1.92529	2.66831558450567e-12
568558	si:ch211-154o6.2	703.423263085943	1.18354	2.67773344507857e-12
103909972	LOC103909972	144.722583574249	-2.37105	2.76402538021147e-12
100149630	mcf2l2	109.425081108366	2.87834	2.83644294162479e-12
553668	galnt7	3441.30071415314	1.33633	2.94011258395312e-12
613193	si:ch211-241j12.4	43.9437616135466	3.34416	2.98310617904718e-12
569455	kpnb3	3914.46232138605	-1.37057	3.06653034661411e-12
550338	alad	1655.7983563409	-1.2403	3.08576519637179e-12
569518	ankrd33ab	39.1778364151154	5.4859	3.09204894091477e-12
101885540	cenpq	86.0630289282309	-2.39592	3.13140904244053e-12
393806	snrkb	374.673425562411	-2.39092	3.13489914661958e-12
110440197	LOC110440197	129.479808127226	-2.48125	3.14732956337587e-12
794598	LOC794598	6189.03093027748	1.55111	3.15263328321827e-12
100536767	znfx1	131.301564965391	2.77097	3.17909505430119e-12
100535969	LOC100535969	469.808113064085	-2.63792	3.18168656855785e-12
325599	lgals3b	2439.58575783845	-1.33848	3.18706887503437e-12
140423	jag1b	296.560367748296	2.77289	3.20681194268546e-12
334936	trmt2a	356.413290336587	-2.84026	3.24306660960128e-12
541347	mat2b	1263.0308428729	-2.07327	3.27338709328228e-12
394182	plekha3	1051.27240913511	-1.11992	3.33041044553472e-12
337690	pikfyve	8936.07849308328	2.21633	3.53527944201707e-12
406813	tfdp1a	601.654041093276	-1.23265	3.55463345611847e-12
108179059	LOC108179059	6297.6764682647	1.31711	3.58536984532855e-12
550453	pdrg1	325.203172688674	-1.86986	3.6254665078158e-12
436850	suclg1	65007.6780118534	1.57295	3.6297643292002e-12
108179096	LOC108179096	235.528984127288	-2.49585	3.63247464840914e-12
406202	heg1	201.405847271243	5.53032	3.70240807811125e-12
108180725	LOC108180725	14569.3449348236	-2.55094	3.70865630048041e-12
393381	fibpa	3269.92859492843	1.24337	3.76685774193633e-12
324052	c1galt1c1	4617.45274079718	1.36693	3.82208115338306e-12
558776	knop1	851.906031093492	-1.79256	3.82394279229352e-12
103909809	LOC103909809	40.7081525560132	4.26124	4.01453681787787e-12
561797	si:ch211-106a19.1	20151.6596761759	-2.11036	4.01577445322944e-12
110439006	LOC110439006	45.907032434325	4.3413	4.02785117504057e-12
445391	nop10	4858.41573318787	-2.03978	4.038047390952e-12
569128	ccdc80l1	96.4544274231247	5.80375	4.15456776580519e-12
503993	si:ch1073-358c10.1	154.199367872976	-2.7058	4.16191189941412e-12
100317924	mras	1542.88203407991	-2.18956	4.20548407821516e-12
324855	plaa	5299.68057821845	1.39051	4.22882570698805e-12
321897	gnl3	6026.12130584174	-1.48754	4.25316152083956e-12
100334443	LOC100334443	9293.3735525368	-1.54882	4.28441755882283e-12
791448	qdprb1	165.225032092648	-1.85239	4.38892218094003e-12
799945	sema3fb	40.4914665436766	3.65121	4.50022149084454e-12
553571	tp53rk	1820.45134972838	-1.40081	4.50571084580121e-12
556471	sema5ba	69.3905161753725	3.98469	4.63011691701846e-12
436593	trmt61a	1290.83452305917	-1.72031	4.68416190003936e-12
321084	dnmt3ba	2420.48796337483	-2.71825	4.70393538806329e-12
100190951	bcl2l11	158.505086358071	2.04587	4.77195182112116e-12
445177	dnajb1a	1691.12184008368	1.7982	4.79128575370876e-12
100004890	olfcg5	32.1980891697985	8.52817	4.81970372029356e-12
30733	rrm2	3372.49279855952	-2.09574	4.8433144660831e-12
492479	btg3	589.645873815175	-1.58345	4.95054421236269e-12
100005273	scarf1	1329.50715151239	-2.47337	5.01353676383653e-12
492647	angptl4	1225.74096303499	-2.3902	5.60939581564172e-12
791146	e2f3	784.104553398896	-1.77974	5.65935407514309e-12
101882195	LOC101882195	76544.2876077218	1.7582	5.68532502574567e-12
570077	tti1	238.663708096282	-1.99983	5.68570345027753e-12
566146	nde1	4140.07815527718	1.5803	5.75087278294385e-12
558154	vegfab	292.320660086492	4.87526	5.79008421107296e-12
567631	tg	295.945201044278	-2.3076	5.84093244788192e-12
100009635	dhx37	744.773814794674	-1.69785	5.95905919948117e-12
100148281	wdr89	753.665936997082	-1.42409	5.98072195698556e-12
100535918	tgm1l5	36.0485019753665	6.20028	6.02790398001493e-12
563720	cc2d1b	2509.18143842047	1.10099	6.06330573669525e-12
100001198	prkaa1	4696.1206021807	2.24007	6.11668000042822e-12
30739	tgfbr2b	173.304440684935	-2.0012	6.46428254787184e-12
101884144	fgd5b	43.7660959772375	-3.57314	6.71140738991956e-12
450079	baz2a	5182.42998734492	-1.85021	6.93580990969856e-12
571887	kirrel3a	66.3107271052489	4.30253	7.24626806696167e-12
767726	fdx1l	1562.48330417757	-1.79426	7.25519663566902e-12
792554	si:ch211-117l17.5	3153.48979427197	2.3167	7.31414874737735e-12
108190761	LOC108190761	932.23760145655	-2.79588	7.41560254664681e-12
559776	zgc:175088	2317.52632909226	-1.23364	7.53646584634492e-12
394032	irx2a	267.079501586359	2.90835	7.53808862161452e-12
566824	unc119a	293.174649691101	-2.36158	7.58069427046852e-12
678522	gpat4	2166.4058852714	1.32138	7.64229255898896e-12
100333151	cpeb4b	6597.19864166894	1.75236	7.67149504396587e-12
317638	igfbp1a	2808.7501279031	-1.27726	7.68287233494772e-12
81882	dhfr	1016.95351971289	-1.8466	7.70414089967683e-12
100004033	LOC100004033	2198.29342154229	3.5639	7.97385240588574e-12
799194	LOC799194	152.624307156675	-3.17793	7.99803949796998e-12
791709	scocb	2007.49973054636	1.04948	8.07461382486839e-12
321294	cpox	1446.03962078122	-1.88181	8.19317673425799e-12
387290	smox	9758.73476861619	-1.45356	8.20829926373544e-12
563273	npnt	104.369924893657	6.28049	8.21860360869702e-12
565213	slc9a5	29.8855647840104	8.42444	8.21860360869702e-12
559124	ppap2d	45.0001590085845	4.27953	8.30328951448713e-12
323424	sult1st1	6062.14044051696	-1.75221	8.42413195478369e-12
553770	pcyt1ab	1905.03971843253	1.73292	8.57638588176282e-12
450052	acot8	319.985225498216	-1.9153	8.78481411678575e-12
564545	si:dkey-40c11.1	36.0833138337083	5.42426	8.90806259555494e-12
571106	tfam	1576.9337449733	-1.54021	9.32773257593332e-12
567239	scn4bb	391.261112995077	-2.91359	9.35747362042824e-12
550550	mecr	281.040571742113	-2.04484	9.88151228399405e-12
406734	agpat3	4518.39990826053	-1.1545	1.01936774383562e-11
393648	rer1	20700.8714559638	1.4447	1.03600791325721e-11
560495	si:ch211-195d17.2	1222.53013086592	-1.22923	1.0528922515584e-11
436891	apoa1bp	546.68691972619	-1.84272	1.11672707519921e-11
100004175	cdkn1cb	292.211761344182	-2.1234	1.11837436955031e-11
406776	uba3	2690.12772249839	1.08164	1.1416535955903e-11
564855	fbxl3l	60.8254637441214	-3.14231	1.1489533990428e-11
550498	iscub	1100.0659061079	1.86535	1.20734211590131e-11
566905	si:ch211-242b18.1	712.824276165684	1.67848	1.21076316990741e-11
560815	riox1	669.414036012486	-2.20624	1.25263074235872e-11
100005373	greb1l	230.384258301149	2.49895	1.25886977762082e-11
378848	hspa5	178761.463416316	2.21323	1.25956021581386e-11
100148439	mcf2la	185.933924856605	3.5746	1.26671097175245e-11
565231	si:dkey-63j12.4	126.286240116374	-1.98779	1.28978418276333e-11
325484	vamp5	318.287863083139	1.99188	1.30679674225819e-11
567701	gmeb1	2797.64105634858	1.75098	1.31091834044231e-11
322614	arg2	3147.00166256039	3.11931	1.31391352151232e-11
100334830	kynu	731.58430187726	-1.54437	1.31418980101745e-11
386899	mettl26	816.773632868575	-1.83248	1.31699611278491e-11
436866	tnfsf10	387.140614918264	-3.02145	1.333461757989e-11
100317899	dnah1	40.671419647497	5.22946	1.39433427343784e-11
562925	atp11a	248.612014556782	2.28452	1.39847152464868e-11
557499	slc8a4b	120.356305302677	-4.13971	1.40074930554922e-11
560341	mych	5328.17520772002	-1.76555	1.40607412494238e-11
436629	nus1	3232.22758823862	1.80323	1.42085483663706e-11
406563	zgc:85936	523.076719443978	-2.55439	1.4313446836744e-11
553087	nisch	1930.38613809065	1.2565	1.43322608282393e-11
100151606	tstd2	835.351380216702	-2.17397	1.43959603854856e-11
799016	pop1	184.873953279381	-2.25939	1.4652863864061e-11
58092	smad3a	482.703877762379	2.14012	1.46599482053123e-11
334337	ubqln4	12226.9161097664	1.04291	1.4953108898272e-11
393671	cabp5a	367.861580852172	1.17963	1.50529833576425e-11
100002627	ptafr	1047.0239323499	2.70856	1.51864536275198e-11
353224	nrarpa	386.724222117453	-2.16828	1.52057713545969e-11
751682	avl9	2472.21407958229	1.36818	1.64420329738721e-11
559850	neu1	5323.32972285803	1.76472	1.66566807066573e-11
678527	si:dkey-25e12.3	9844.08751871383	2.19856	1.68540171261163e-11
100005761	ehmt1a	1654.34424240225	-2.19816	1.7366152149436e-11
100536352	urb1	324.246142564633	-2.20409	1.76341236246069e-11
553234	ptgr2	543.536608221202	-1.88919	1.76341236246069e-11
567731	fam69b	234.565288216961	1.83534	1.79833860659264e-11
100333333	mgat4c	336.083545261661	2.21413	1.80402575191319e-11
110437831	c24h18orf63	29.336385143876	4.41396	1.80697865290052e-11
317641	zcchc7	350.456696502798	-1.63762	1.83371651067128e-11
100537865	prr5b	154.280187896043	-2.44557	1.84747803568073e-11
386590	hsp90b1	34360.0874798628	2.18108	1.90329337217924e-11
436758	mrps15	4054.09311195702	1.408	1.93194230532833e-11
407988	rcan2	692.047611228206	-1.70194	1.93247079377078e-11
796618	si:dkey-17m8.1	809.943559688697	1.86955	1.93464877158468e-11
767734	ptk6b	1386.89018427224	-1.69431	1.94542256103962e-11
101883900	LOC101883900	89.4660572319625	4.95486	1.99416604710116e-11
553523	trit1	540.993960488031	-1.47177	2.00505131276945e-11
108179086	LOC108179086	32.6578011037551	5.75358	2.00971419372223e-11
406796	gnb1b	46964.7271905781	1.19797	2.04252773530763e-11
767760	slc17a5	3850.14973760767	-1.97598	2.06194399922858e-11
406276	s100a10b	6070.37307326987	-2.03299	2.14110369804424e-11
327138	slc26a11	1520.22830705812	1.97794	2.16363887731787e-11
541336	zgc:112496	113.926618558142	-2.81667	2.22486243391845e-11
561914	malt1	3596.88633707832	1.97548	2.23776289385e-11
555239	mtmr10	322.498071335195	2.07989	2.3169171012102e-11
100334247	vipr1a	43.2920999204947	-6.36779	2.36329796896735e-11
553778	rab23	212.296329047274	1.51784	2.37549523292643e-11
447888	spout1	345.454282190254	-1.91737	2.40076610591108e-11
101882903	arhgef15	76.2924082379083	-4.04748	2.40557756672923e-11
335865	hspa4a	18071.3782231173	1.46883	2.43029631488631e-11
100270761	scpp8	715.318198976661	2.55959	2.45423141162938e-11
100002203	si:dkeyp-13a3.10	197.313797450345	2.38173	2.50457700595429e-11
259255	plagl2	397.055771141579	-3.43799	2.50542493651038e-11
555364	rarab	153.130720315187	-2.95949	2.56833680890369e-11
555640	fam184a	259.288196453041	5.32495	2.59691801823667e-11
447875	smyd5	647.671206048816	-1.65939	2.61430914902658e-11
192298	sec61a1	15523.1298444157	1.26499	2.73910853255211e-11
568316	prkag2b	655.438986434024	-1.90013	2.76113719001164e-11
560481	hspa13	4564.18334698105	2.22308	2.80815639210606e-11
100329344	LOC100329344	1156.32878210038	-1.06845	2.88274381135957e-11
100151416	cdkn1a	365.439173983256	-2.48353	2.96661915888259e-11
558182	igf2bp1	5076.96882779166	-1.45111	3.00389251348138e-11
570782	mfsd11	1362.61677909196	1.33183	3.00788888713351e-11
566517	aga	696.637561472852	-1.14202	3.00788888713351e-11
553311	p3h3	37.1174280887657	5.92578	3.03516951796103e-11
560026	dsg2.1	1156.20049852933	3.3676	3.04119232770467e-11
553414	rnd1b	71.2157471483038	3.06879	3.04496932673166e-11
570626	stab1	3533.19235542416	-2.28745	3.06745793725205e-11
436950	sumo3b	4843.68086115054	-2.29992	3.13558192958126e-11
393505	srsf10b	2382.27471003538	-1.56999	3.18196852772978e-11
334306	msto1	657.827643861542	-1.90872	3.2203319678198e-11
560591	atad5a	610.81083178083	-2.09329	3.28267942198032e-11
405802	plscr3b	5542.82005770289	1.48894	3.29648301203616e-11
110439846	LOC110439846	368.428932310437	8.78726	3.3016292542808e-11
792085	ndrg1a	9090.62657807774	-1.77001	3.32333058653588e-11
557710	si:ch211-212d10.2	453.969504829775	1.28088	3.4528488064481e-11
566886	epas1a	648.378126810817	-2.3083	3.46664402854851e-11
751689	cbx3a	6431.42980989584	-1.67809	3.47540798912057e-11
569118	ddx10	1559.32680993363	-1.32799	3.4989483190324e-11
558833	spag9a	105.617931152763	3.23382	3.5034527982746e-11
564291	cables2b	278.884574694187	-2.5971	3.50710705879681e-11
100537548	si:dkeyp-97a10.1	127.91492751588	-1.91472	3.52862117399029e-11
100320511	si:dkey-187a12.4	534.43969905928	-1.45348	3.5604036517174e-11
445488	morc2	3017.31468500349	-1.4833	3.63323920267398e-11
541367	rca2.1	5160.74815211207	1.43719	3.64090366936486e-11
387260	scarb1	326.084314649634	-2.11694	3.7921448095694e-11
393972	nck2a	684.439076943038	1.53652	3.86624247268776e-11
558139	sele	142.003147399617	3.3492	3.86823326774639e-11
407983	tp53bp2a	389.051663772822	2.0442	3.86940913169107e-11
795154	immp1l	262.733358659544	-2.62213	3.90626007027067e-11
564151	clspn	1104.01288550679	-1.9526	3.92126461200504e-11
568468	fat2	1020.26070273274	2.50758	3.97865962867232e-11
569096	rufy2	372.965879844585	-2.82853	3.97873030701871e-11
393145	tmem38b	1256.05413163634	1.03492	4.01347110833273e-11
794038	brip1	112.66257396553	-2.57698	4.0489238992354e-11
793952	si:dkey-253i9.4	1353.02594873738	2.61331	4.06452743157502e-11
405776	glcea	58.6296940148503	3.80632	4.07277034855329e-11
553944	ugcg	8956.12500243269	2.32194	4.15045008903684e-11
692125	fanca	63.7349618747287	-2.96663	4.15045008903684e-11
559160	si:ch211-214j24.14	479.53515903149	2.50929	4.19965475530682e-11
321220	ptbp1b	79.0525963389743	2.46412	4.45216491742585e-11
445182	auh	1161.58702207393	-1.40079	4.46928725807387e-11
322404	nop53	2051.48051115307	-1.15442	4.48589758630259e-11
108186185	LOC108186185	106.367015623732	-4.02458	4.55597782842986e-11
436908	slc17a9b	2158.55370667006	1.88289	4.6154559461413e-11
767790	pdgfab	1090.20792329752	-2.08481	4.61788075640755e-11
100002175	nkiras1	1147.57694427007	1.64117	4.66464459198823e-11
334471	larp6	7730.90230572156	0.983971	4.68704632675522e-11
323848	mcmdc2as	156.497558194689	-1.77141	4.72043932628546e-11
101882914	ssuh2.1	72.8796736731924	2.61293	4.74585672374832e-11
406428	pdhb	13141.8229595813	1.52946	4.74839177759805e-11
568368	lipea	572.025411470044	1.67333	4.8035398985206e-11
406280	itih2	88.4238549859565	5.55028	4.81979270830595e-11
117508	klf2a	382.877011077766	-3.48556	4.8255006786431e-11
368331	erlec1	6475.08357224273	1.59469	4.84855346475876e-11
559524	ptpn5	48.495998309426	5.14275	4.85238240454510e-11
405828	nup43	928.973362607644	-2.23391	4.97351824836972e-11
564750	pi4k2b	4010.24093392688	1.58502	5.04904740211609e-11
793098	yme1l1a	4434.1487009783	1.56001	5.14404945993581e-11
406614	irf2bp2b	4857.27076534814	-1.93255	5.22099291749173e-11
791775	pdxka	235.695840953503	-1.77612	5.25539256655549e-11
568556	klhl3	261.741966195969	2.33149	5.25875132098298e-11
100101460	hcst	447.467932444781	2.11737	5.27512898511893e-11
327133	hyou1	21904.5289548476	2.46639	5.38187389162973e-11
619412	nedd4a	785.67498491747	2.17207	5.43120211444489e-11
266992	cad	1152.2661572077	-1.71232	5.44594222657314e-11
334446	heatr1	219.310400645524	-2.91866	5.45302713323136e-11
567921	osbpl3b	1117.88622388793	2.08973	5.51260124324559e-11
110438434	LOC110438434	215.783645218481	-3.43126	5.58448389814078e-11
503864	rln3a	59.3126746770794	4.43617	5.64094093101753e-11
386994	rab11al	90.0411241161109	5.2098	5.79280230584383e-11
564713	si:ch211-220f12.1	384.844749841252	-2.69353	5.8378375419335e-11
563643	mms19	1813.63695217545	-1.62047	5.94819238909269e-11
100334188	tbx3b	139.817817510408	3.36711	6.02267103246625e-11
393185	trmt11	1326.18929586663	-1.08703	6.02916833708634e-11
322815	ubr7	2661.94428412192	-0.994656	6.25065921692504e-11
767810	mhc2dbb	36.7048139788979	5.08218	6.32740342039775e-11
557421	cbarpb	316.859622744705	4.2762	6.36945937671432e-11
101882648	fat4	96.1315017341189	3.57475	6.41048410079308e-11
323464	lsg1	1458.71166070206	-1.26094	6.48587441265548e-11
556989	LOC556989	1840.12330177846	1.46904	6.4934461974407e-11
553270	pde5ab	103.177126789809	5.00312	6.57674450221259e-11
436655	rbm34	1184.9194442252	-1.69333	6.61135688439036e-11
564114	si:dkey-58f10.7	247.984949433488	-2.9322	6.80074648055324e-11
100333057	tsg101b	3541.22283435013	1.71362	6.91360662009322e-11
566513	zbtb22a	351.583536424491	-1.31185	6.92036396425743e-11
654774	dock4b	1747.11924377843	-2.73073	7.06904975571508e-11
562784	mxra8a	104.631201168929	5.03553	7.4285499624159e-11
564537	shdb	84.1702715808029	2.84943	7.50060134366355e-11
393990	ergic3	4586.40053992098	1.61303	7.55683505451674e-11
792182	eef2a.1	1042.6909723737	-1.47465	7.66159272427161e-11
560986	pnpla6	680.667106874346	2.46767	7.80368769608065e-11
394078	cwc27	638.147297549888	-1.44462	7.83775178647324e-11
100149419	si:dkey-69o16.5	3393.68395501988	-1.98192	7.89508538763879e-11
564023	si:ch211-210c8.6	875.550076939138	-1.26809	7.92324243229747e-11
100536039	LOC100536039	496.157733101496	-2.16509	8.04647487912704e-11
445069	ntpcr	54.8681219524945	-2.47965	8.17809511917656e-11
795897	LOC795897	38.986332806419	8.07972	8.23821674163477e-11
571626	sh3gl3a	725.818078920045	-1.79112	8.28044703593301e-11
108179023	LOC108179023	372.302662903755	-1.39295	8.313751054443e-11
393884	sdha	23399.8880704059	0.973297	8.33421820481726e-11
567565	trmo	273.629216219301	-1.32168	8.51430454704239e-11
415207	rbks	377.428036748667	-1.86366	8.53005700805333e-11
566065	wu:fe02h09	499.429144561275	-1.4773	8.8344529110993e-11
101884764	lpar6b	172.467036581324	-2.32243	8.84228254484249e-11
100192215	zgc:194469	372.045829618409	-1.62994	8.85277323305983e-11
550238	lmbrd2a	3016.75669615358	2.22273	8.86094171591531e-11
100330598	si:ch211-160e1.5	716.731206000532	-2.1091	9.07318975965087e-11
554122	pon3.1	338.207676172925	-2.1525	9.13545088999194e-11
336876	tollip	4226.21895162655	1.34705	9.25869083237664e-11
447883	zgc:101783	545.670402603424	-1.17907	9.52672339361978e-11
794020	ndufaf5	1389.98072727052	-1.61043	9.60562646309774e-11
393436	aqr	1560.03275470332	-1.167	9.61339492937946e-11
393963	srp54	10843.8152348442	1.24041	9.62029007591994e-11
327364	wu:fi04e12	340.519600191107	-1.82767	9.6345084398179e-11
559746	xirp2a	1088.42612260382	-1.46842	9.70971950177986e-11
321129	rtca	4718.48188962368	1.07701	9.97302837394083e-11
553566	zgc:109986	219.176687259913	-2.29684	1.0137890668112e-10
30196	lmnb2	4162.35639427654	-1.73847	1.02470054604346e-10
569049	cog4	2756.02872851458	1.02504	1.03929657039072e-10
550404	gpd1a	14706.0958499648	-2.2189	1.04339912000733e-10
445288	acads	1362.79957859827	-1.35397	1.04339912000733e-10
562455	arhgef12a	1291.45961625522	-2.41376	1.0448811445171e-10
100329499	unc13bb	72.920410605703	3.52514	1.05556962420179e-10
553450	LOC553450	1190.63982907413	-1.65374	1.06633174902442e-10
567941	e2f7	630.67389133739	-1.64915	1.06701892581266e-10
565088	rpusd2	686.392163777677	-1.34592	1.08072241673678e-10
555591	si:dkey-261j4.5	28.9460243302627	5.32236	1.13046471696994e-10
286746	sdad1	1784.89223921895	-1.784	1.14178789899123e-10
103908986	LOC103908986	1169.03925745581	-2.66759	1.18371953929981e-10
555679	scpp5	68.2337584309709	-3.32024	1.18625546609087e-10
561703	rictora	626.546151253308	1.85029	1.1901772917685e-10
100333025	gdpd4a	58.5921912088184	5.38839	1.20181041328098e-10
554091	dnajb9b	2730.1410257071	2.62949	1.21166845751232e-10
796219	zcchc14	675.63535961072	1.68862	1.22211151831514e-10
322251	rpl7l1	5776.5572191065	-1.40812	1.23015688101295e-10
561724	csnk1g2b	2984.2500900489	0.998619	1.2308980565106e-10
556454	csk	1452.47348647878	-1.79731	1.2433216051298e-10
564805	arhgap29a	165.584908611174	-2.62837	1.28205556693198e-10
447905	entpd2a.1	2950.72106072069	-3.18946	1.30517697849643e-10
335392	si:ch211-153b23.4	86.0326488334861	7.14404	1.30569198417132e-10
369191	tnr	323.055335061078	1.99804	1.32792156073692e-10
393247	naalad2	56.3606857238936	4.56463	1.34088268250238e-10
406341	caprin1b	3651.86586838563	-0.70734	1.34095706815426e-10
100151129	rab11fip4b	1235.08915115042	-1.70626	1.35837745669345e-10
560440	si:ch211-210p4.6	1499.96265749798	1.54066	1.36065293999647e-10
393617	nat10	2251.32230945331	-1.49233	1.37077357397954e-10
393621	ndor1	1545.17752510729	0.829882	1.37264984914087e-10
100002095	zgc:162707	637.245345208496	-2.069	1.37264984914087e-10
556523	sh3rf1	170.519223940251	2.09452	1.381733664604e-10
436958	gpat3	570.777237899185	-1.93878	1.38210308202879e-10
556641	pld1a	32.1776254479809	5.26853	1.38282475995513e-10
100333903	adamtsl4	1306.37705225242	-2.53345	1.38751912981851e-10
613021	nol8	693.090862826655	-2.27254	1.42980797706216e-10
556291	gnpda2	1546.92097523144	1.51051	1.43134495964088e-10
30314	apoeb	50702.5371929144	-2.80438	1.45749676507354e-10
323713	midn	7949.93408550539	1.35312	1.45749676507354e-10
553627	ngly1	2934.1153842353	1.14794	1.46606010005508e-10
100320658	loxl4	468.022786089208	-2.44499	1.50232905220922e-10
558811	si:dkey-42i9.8	72.174629845455	-2.49516	1.50276868190496e-10
100003744	abcb10	2480.93402773054	1.72144	1.54610244490791e-10
101885322	si:ch73-40a2.1	3370.74885351776	1.76252	1.54623808588811e-10
798269	si:dkey-23c22.5	157.119507394818	1.6192	1.56821268994429e-10
436903	bpgm	930.599795890513	1.2829	1.63127908466194e-10
678540	gale	3811.92694107373	1.16448	1.66549011534374e-10
793909	LOC793909	1323.13389862384	1.45709	1.67279588954414e-10
619249	snx24	1012.70574836968	1.80877	1.67540095103658e-10
447842	clpxa	4998.5297639034	1.57536	1.67853250766971e-10
101884911	dfna5a	7613.81283231084	2.14694	1.68574045070299e-10
561925	ulk4	96.2478912818712	-2.58508	1.68936211689829e-10
559942	ogfrl1	4588.21991917964	3.78218	1.70333743321297e-10
561462	cyp2k8	8621.7104435812	1.48634	1.75876939455078e-10
567938	pik3c2b	805.644564015137	-2.32557	1.79025020194771e-10
664698	neflb	201.09835889483	3.33809	1.80273272478211e-10
378454	aaas	925.840183113949	-1.77335	1.80273272478211e-10
100329955	si:dkey-234i14.6	158.86711205183	-2.49271	1.82599218627967e-10
406840	sesn3	3060.20016676733	-1.82473	1.85627699480964e-10
795084	igfbp5a	59.4901777639415	-4.33564	1.88326394634791e-10
101884568	LOC101884568	176.685651175784	-3.52544	1.90061631939639e-10
100093704	smim7	2301.77086025041	1.2753	1.9011589714546e-10
794050	ccl38.1	468.593541859985	-2.55122	1.90409872600693e-10
100150882	LOC100150882	35353.7516643971	2.28479	1.9061523078513e-10
30747	tek	2214.96058009008	-2.37213	1.93209406087095e-10
571155	si:ch211-167b20.8	173.046043803079	3.08125	1.96859508114929e-10
494085	pink1	462.768524731376	1.43834	1.96859508114929e-10
552978	ncapd2	1503.48263095636	-1.58156	1.97103194330097e-10
563626	tbc1d12a	210.941838611779	-2.77711	1.97382006837123e-10
436798	rpp38	614.004331789781	-1.38625	1.98273952589098e-10
110437777	LOC110437777	429.971655461737	-1.58203	1.98972057433139e-10
550591	zgc:113208	1435.00459956592	1.6912	2.02698672096296e-10
447846	bmpr1ab	60.860106161365	3.12531	2.0384378459441e-10
327057	uck2b	1634.70868052427	-1.64468	2.04017524497904e-10
558034	xpr1b	3300.43945989351	-1.28787	2.08779467454748e-10
565702	cnnm2b	90.8382503976371	4.2826	2.16931371730771e-10
436926	serpinb1	300.349452122562	-1.69683	2.18380055576859e-10
100005496	si:ch211-1i11.3	474.580929191831	1.90128	2.19420830869701e-10
100535085	si:ch211-256a21.4	406.881674249639	3.14592	2.19946367522756e-10
562538	dph2	3218.89706996539	1.3093	2.20443862596561e-10
568768	si:ch211-26b3.4	3006.51618459718	1.39727	2.25950323592832e-10
562329	polr3b	332.39166533756	-2.12517	2.27913707506e-10
503702	prnprs3	2054.25088530166	1.44148	2.28073900742971e-10
567512	tspan33b	106.379974216164	-2.60106	2.31476401034537e-10
436717	decr1	1210.09747656848	-1.95381	2.3488878324491e-10
393932	slc15a4	13239.3302987692	1.79495	2.35339360037905e-10
114466	tnfsf10l	135.466083832585	-3.7008	2.41048499006783e-10
791187	srpk1b	493.733947624061	-2.33978	2.41158759340674e-10
793362	b3gnt2b	11511.4957810076	2.01748	2.43969096669517e-10
568476	g0s2	434.148372988788	-3.58227	2.49517124133949e-10
110439214	LOC110439214	97.0446206421661	1.99934	2.53788819923472e-10
503783	metap1	91.6433056005262	-2.14704	2.54269832314553e-10
555704	mdn1	401.39649640969	-1.66826	2.60848484680731e-10
558499	chka	60.7201639221	4.24903	2.60917387589594e-10
406255	fancl	163.237277171431	-1.91004	2.65051501301638e-10
100005529	dnal4b	111.215366663313	1.98824	2.67477571061596e-10
406624	ggh	2873.17909780592	1.38814	2.68204555402975e-10
570867	srgn	16271.6510278974	1.69761	2.71082642131866e-10
751635	alg5	8552.21038740388	1.18341	2.71158414438342e-10
553465	sik1	3527.59920120179	1.47006	2.73039567365093e-10
559012	tgm2l	171.588746703704	-5.01899	2.78696586484761e-10
30659	dnmt3bb.2	218.570121240087	-2.76361	2.80168321580969e-10
494063	zgc:103499	297.068034261256	-1.70969	2.81564761723704e-10
553237	zranb3	109.265238680466	-2.56707	2.84813385310021e-10
321564	eif2s1b	3148.90963515665	-1.06845	2.86603510757859e-10
406852	nup133	3102.38706435734	-1.23049	2.89536525305788e-10
494077	tsta3	1227.09967261546	1.41735	2.91813332253794e-10
100000478	mgat2	885.438566365601	-1.07987	3.08218652807897e-10
566761	edaradd	30.495191847973	3.69586	3.10153836465574e-10
492523	def8	1408.08033267833	1.04622	3.19495603315896e-10
140815	cebpa	57179.3572154262	1.21129	3.20413208495857e-10
799963	gpt2	1200.88828723888	1.43649	3.3326304353139e-10
550330	prrg4	447.601398527058	1.38257	3.36205136855538e-10
558758	acp6	5929.93845939703	1.26274	3.36256468642094e-10
100002463	pprc1	2806.68364699062	-2.33879	3.39225728512234e-10
394081	bysl	4702.11420916464	-1.36432	3.47043434934633e-10
561653	vps45	1117.32418776874	1.00424	3.53178144348844e-10
492512	ftsj1	294.582233441545	-2.01917	3.5409892087264e-10
393308	riox2	1550.62997687379	-1.72175	3.58341259254964e-10
568893	fam46bb	82.104051437337	2.97986	3.58952626522638e-10
558725	syt16	77.9122997068077	3.34631	3.69412382255903e-10
100004688	col27a1a	166.124447243714	3.12516	3.69412382255903e-10
556208	akap1b	1979.20043140668	-2.38952	3.72642648693078e-10
550552	atg16l1	1857.6451006616	1.4616	3.81040486012791e-10
393424	dnajc24	232.476696271133	-1.75788	3.81591967673488e-10
555604	nox1	253.521641440684	5.52742	3.9829907012672e-10
570216	itgb1b	6083.59214796786	2.29595	4.06951002843177e-10
431720	nr4a1	5179.2786437159	-3.00217	4.11803119509431e-10
560592	myo15aa	132.983905499546	4.88266	4.1280108625467e-10
100037338	inpp5ka	1208.95231679002	1.15663	4.23218498351528e-10
553326	hacd1	244.376666835995	-1.37244	4.26934594434179e-10
556535	setd1a	439.394658466236	1.50142	4.28783677652462e-10
492497	stam2	7334.27684126536	1.32404	4.42041450489375e-10
777734	zdhhc15b	2792.18694600613	1.32311	4.45301878959493e-10
559035	shroom4	196.108381950942	5.34602	4.49601563774045e-10
100149102	lysmd4	479.366854218504	1.63237	4.52135941955207e-10
101882843	LOC101882843	2092.13874735735	1.84705	4.67630423700628e-10
561626	si:ch211-225b11.4	201.631471175896	-2.3133	4.77134978524055e-10
100144628	shmt2	1865.23164585481	-1.24356	4.82570826114558e-10
554157	ctss2.1	53980.7674693166	-2.29943	4.93026262101287e-10
445392	fbxo5	555.83146327315	-2.05667	4.94862056279398e-10
571770	adgrd2	340.04429717392	-2.63538	4.98097776269025e-10
100003989	csrnp2	300.047895646772	1.17472	5.24586940137061e-10
556725	fam131bb	141.481160042811	4.09774	5.29479286689195e-10
100136856	vetz	386.190644406469	-1.97382	5.29992597711232e-10
407981	epb41l3b	7734.16755013795	-1.62984	5.3546336701377e-10
100148088	enthd2	694.784665886824	1.41284	5.36274111814567e-10
768121	foxo1a	860.457445840783	1.69053	5.40091847340386e-10
100038797	rhcga	84.2630910116066	4.90591	5.59920696611924e-10
559344	zgc:195081	85.0841905425807	-2.69684	5.63372064782538e-10
101884549	LOC101884549	247.555415178826	-2.09362	5.65354138928979e-10
541405	pex7	546.418508661937	-1.57744	5.7925303834417e-10
100307075	wsb2	352.718974607361	1.49807	5.96934040664836e-10
568713	dse	1758.59001417928	-2.20534	5.99923654534532e-10
558828	dcaf17	183.157311332497	-1.70234	6.09924172186758e-10
321485	taf9	2527.74080939357	0.973835	6.09924172186758e-10
403116	st6gal2a	522.893137836434	1.64037	6.10520094809122e-10
100536675	tyk2	1110.38111052504	1.68581	6.1390447312391e-10
352933	sps2	2069.99420558017	-0.841215	6.18349213741112e-10
492489	sgut1	6078.60591652499	1.12237	6.34145278712382e-10
571114	efhd2	44998.9487061561	1.63722	6.34145278712382e-10
334195	mat1a	73.1602030183202	-2.92573	6.3883419922468e-10
100535806	LOC100535806	289.131893469445	-2.78775	6.43903738425859e-10
567691	si:ch211-251p5.5	113.889360872564	1.5889	6.44420084615831e-10
568165	si:ch211-278j3.3	1146.94319385732	1.21061	6.46491548052601e-10
30691	ephb4b	273.076219675838	-2.23372	6.67057690216375e-10
393520	pno1	1771.0573885394	-1.20787	6.68105892162108e-10
100000101	kazald3	353.996125783361	-1.99533	6.68398745056625e-10
550496	snx30	3057.69154368584	-1.54193	6.8726172472962e-10
393260	nol12	2403.81057786749	-1.26849	7.09648617841009e-10
571430	si:ch211-183d21.1	87.3778395193792	5.10496	7.23519926850296e-10
556951	zgc:172352	27441.2607510866	-1.99879	7.30872934401237e-10
335008	pla2g15	7188.99778619818	1.49969	7.32156212169212e-10
323929	mtmr14	7615.19985855514	1.67825	7.33106100192778e-10
544651	kif7	273.254956273485	2.71586	7.37885073958826e-10
796312	slc5a6b	98.4205051587601	-2.992	7.46210649927092e-10
555630	si:dkeyp-33b5.4	222.170836284151	-1.45722	7.46210649927092e-10
368435	p2ry4	410.095056303639	-2.04452	7.46651558828677e-10
566836	si:ch211-63o20.7	832.574595766108	-1.57923	7.54114881723523e-10
566491	bcl11ab	415.656371152341	3.81292	7.60979764984008e-10
100535600	themis2	1310.16087264653	-2.33168	7.65659361666123e-10
393410	gpsm2	601.57946151835	1.30851	7.661669350929e-10
550532	poli	206.04343503302	-2.06765	7.81314758988397e-10
101884799	LOC101884799	53.0271618139309	4.72217	7.86798077009063e-10
664699	as3mt	210.498387219294	-2.46899	7.90265376536247e-10
735312	abcg2a	32862.9243734987	-2.79367	7.92207557533175e-10
572300	si:dkey-22i16.7	23.6216778282715	5.04724	7.93707577946095e-10
102997062	il1fma	3546.80650302215	2.35842	7.95711240047256e-10
566493	abhd5a	299.45324302335	1.72975	8.22471071398498e-10
402897	rbm48	599.045460205238	1.54106	8.23003558984444e-10
767755	zgc:154061	150.069379211292	-3.16189	8.28619471593591e-10
724080	b4galt5	344.860830803808	3.21109	8.33561241124029e-10
406326	cstf3	2029.40225828783	-1.01241	8.40805652417746e-10
492509	pcid2	1457.33906758308	-1.22747	8.5371485478125e-10
550263	polr2h	1202.13189487982	-1.83522	8.62917586655536e-10
503514	angptl2b	151.375935424522	4.62628	8.70142315714153e-10
393789	hdac9b	16020.0106666881	1.66904	8.74670000930942e-10
393553	ammecr1	2284.78512547155	0.915783	8.74670000930942e-10
101884102	si:ch1073-147h9.1	156.597865878481	-2.09136	8.75672862358933e-10
30585	dlx3b	102.327128513138	3.67558	8.78559766057361e-10
100538326	myom2b	243.731427679793	-2.43778	8.90831701149778e-10
321739	ipo7	5641.50732651597	-0.935626	9.0162413524554e-10
100329707	farp1	932.537631418513	-2.22901	9.10510238506875e-10
559276	ahnak	974.021218879795	1.61746	9.12528953116366e-10
335449	serbp1a	29177.7794574328	-1.16233	9.33892255625743e-10
568719	znf800a	436.238839504743	-2.1622	9.46659301220108e-10
327447	nploc4	3361.82877582267	1.22824	9.75441262534274e-10
327538	ccdc82	678.471133123463	-1.39622	9.76296830471294e-10
570584	moxd1	18530.9705838888	2.54691	9.76607248303827e-10
406358	hacl1	288.322680962869	-2.14639	9.78156380005370e-10
334010	il11ra	91.2972304362902	2.54118	9.95487698366739e-10
751629	setd8a	5348.50066090318	-1.00541	1.00500901013392e-09
386932	poc1b	79.9110216213962	-2.21395	1.01093086726015e-09
100148154	agap1	474.259996081373	2.6876	1.01371178340738e-09
100126017	gpr84	39801.4032711723	3.18749	1.01459723693972e-09
100330352	si:ch73-361p23.3	1780.35462883843	6.07758	1.02056477248645e-09
550246	ankrd49	317.370596044902	-1.25609	1.02382825365492e-09
393142	ccdc53	684.294448953346	1.31486	1.02968305292551e-09
792002	rhbdl2	658.215088557601	-1.5506	1.04996243946105e-09
560546	slc2a10	728.6119308932	2.30626	1.05058283646219e-09
393264	uap1l1	3143.30430915577	-1.26596	1.06079544507375e-09
393173	rpap3	707.811856186724	-1.56029	1.06810470506362e-09
323839	scyl3	1907.41026765621	1.24702	1.07963612755882e-09
553792	fpgt	1108.15801053094	1.20932	1.09799676645713e-09
550332	dctd	532.256334295714	-2.20619	1.10491188874378e-09
360142	mxa	400.74720605557	-1.92193	1.10491732491163e-09
100002528	gemin6	181.563158993611	-2.62096	1.10524331701608e-09
100002283	LOC100002283	818.85265081326	-1.85365	1.11604333206619e-09
567919	sik2b	1875.87763254795	1.73563	1.12061991849227e-09
101884837	wdr70	477.22603710054	-1.29286	1.12555600621169e-09
445101	rpusd4	342.618994766069	-1.44059	1.12695215336352e-09
445495	tmem144a	224.97982696212	1.35455	1.12728695088663e-09
559540	bmb	216.526472311629	-1.68152	1.1705191998877e-09
767802	tfb1m	343.742674101644	-1.32758	1.18060822313586e-09
562393	mctp2a	96.7581136903844	-3.39903	1.18884656182333e-09
103909161	LOC103909161	221.620241562576	2.07479	1.19151358965879e-09
436951	timm10	2314.70984401651	-1.69	1.21676231535067e-09
492795	dia1a	212.653022364372	-2.08309	1.21699734294113e-09
101886833	LOC101886833	50.6620996160328	5.27333	1.23240062303048e-09
436790	arl6ip5b	804.107337612895	1.59358	1.24360990888791e-09
492460	trmt10c	1150.32175589303	-1.80588	1.25327293350983e-09
100331939	ephx4	46.2748314392452	-3.74643	1.25663047455056e-09
100534988	si:dkey-164n2.1	102.223419145595	-2.59795	1.266837091195e-09
431772	sgtb	164.032673907107	2.04322	1.27661880599936e-09
110438794	LOC110438794	76.7156597277752	-2.52843	1.28054155292218e-09
550241	rrp7a	1574.76877058969	-1.65557	1.2838430898666e-09
553685	cyb5r4	1377.77985379326	1.02392	1.29440442165938e-09
557659	btbd9	1041.37205524431	0.975736	1.32820042229433e-09
566708	flt3	23.3503373366399	8.06663	1.33131972893444e-09
100003066	ndufa4l2a	80.6909143621898	1.7136	1.33367213120529e-09
323406	krcp	852.141260867399	-3.02009	1.34438560772393e-09
568129	si:dkey-56i24.1	3461.91168742957	-2.09295	1.34617026292962e-09
436856	faima	173.051408371804	1.80482	1.34894765066609e-09
407679	topbp1	542.338878702315	-1.54382	1.34958417505638e-09
322348	setd6	147.636287668279	-1.95153	1.41528095158141e-09
799566	eif4ebp1	10991.1681326999	-1.74365	1.41736066568724e-09
692304	dek	1446.09556006677	-1.76232	1.45689244848391e-09
556282	slc46a3	76.4205836825189	2.41067	1.5176808871701e-09
101885596	hck	16846.621388916	1.7782	1.54076643723321e-09
100002007	oaz2a	152.796138029425	1.97834	1.55076792415404e-09
561460	zgc:172302	495.257720080778	1.76862	1.60221664722571e-09
561062	si:dkey-157l19.2	151.776149883941	4.57334	1.61301212948461e-09
553575	gsr	7945.57287680691	1.49962	1.61301212948461e-09
110437890	LOC110437890	3618.27731088411	2.2673	1.63857993601197e-09
393202	hif1ab	20468.7574209812	1.30586	1.67432816333517e-09
449995	atl3	6458.29367167978	1.32488	1.68156228837253e-09
445203	mnd1	231.957340133216	-3.00944	1.72067891372589e-09
553083	rbbp9	970.461350536989	-1.84605	1.72579452388093e-09
100004321	LOC100004321	25.9422682208982	-4.79811	1.76285526945508e-09
100006778	il6st	542.8121161655	2.20157	1.78004427788589e-09
450081	rad51c	72.0026783027543	-2.52368	1.78381798209185e-09
334269	myom2a	27.5255013660003	5.18573	1.81433068247913e-09
100000883	rpz6	340.793732026759	1.55326	1.83550766078852e-09
568308	si:ch211-195b11.7	1825.12785815494	1.90193	1.84835795104319e-09
791686	cdh30	1742.24643076511	-2.76632	1.8487769479098e-09
560593	si:dkey-159a18.1	38.3475330334277	-4.85497	1.88426012036669e-09
556036	zgc:154055	633.585169885517	-1.82294	1.90677750001843e-09
571588	tec	4176.53173819507	-1.38352	1.95627104682032e-09
436849	hrsp12	1463.51946425851	-1.88315	1.96586474575063e-09
30223	efna5b	45.8697041906123	3.05266	1.97874824197538e-09
359833	tfpia	67.1309929077777	2.76294	1.98214899382708e-09
558615	si:ch211-223m11.2	21.2963165834374	7.9296	1.99443822211755e-09
101910198	akt1	270.3750323869	-2.37913	2.02381343653713e-09
402963	zgc:77398	325.001369429294	-1.63093	2.03460137512752e-09
30194	alcama	271.957487326897	2.90213	2.05914323269764e-09
101884613	LOC101884613	169.039933457891	2.61637	2.06058775002374e-09
567594	c24h7orf50	293.486386651172	-1.79275	2.07469650825687e-09
569706	phkb	383.006956036221	-1.3375	2.08381801327667e-09
558964	sec14l8	784.198892341794	-1.91061	2.09012316540159e-09
557935	zmp:0000001082	15506.2992248443	-1.97033	2.09245345724825e-09
563463	pbxip1a	164.867986654224	2.8314	2.09245345724825e-09
103909420	LOC103909420	98.0877717145167	-3.61238	2.14914899581276e-09
334110	tmem39b	935.221260913939	-1.08014	2.15765784553127e-09
100148360	gatd1	1708.70592023209	-1.08839	2.19619503230172e-09
566269	zbtb10	268.188248181635	1.73785	2.19765493611301e-09
101886124	LOC101886124	53.6300972279426	-2.80962	2.19946501073735e-09
567306	napaa	806.435595126226	1.49531	2.20050215731504e-09
497505	acana	172.138176720993	3.37229	2.21681031929811e-09
100151196	LOC100151196	10993.1560822327	-1.23625	2.23799524822442e-09
565387	tmem104	3203.38427817856	-1.44351	2.23826736727552e-09
558400	si:ch211-51h9.7	181.884878923987	-1.95721	2.25615488261616e-09
497596	faf2	8366.51204676484	1.23716	2.25979825958709e-09
386709	dnajb11	20188.0782365174	1.65402	2.27132522280077e-09
445045	mob4	8005.81931996029	0.958768	2.29197690373255e-09
100151491	wipf1b	4506.16276263388	-1.24205	2.30838707432212e-09
431763	gadd45ab	158.384276134391	-1.92959	2.31223552685096e-09
110437708	LOC110437708	297.460117514815	1.33989	2.31981869470924e-09
30452	etv5b	452.823067226343	-1.80481	2.36391950912627e-09
100538279	LOC100538279	47.2187156835895	2.98922	2.3850168437592e-09
406799	sdr16c5b	18611.8545549461	1.37527	2.38908517553677e-09
100535743	LOC100535743	185.380013788096	-2.75975	2.44661633311057e-09
378726	csrp1a	3108.99891220784	-1.34025	2.45543494597733e-09
100005035	si:ch73-27e22.7	28.0719390086669	5.0874	2.46063092383449e-09
445199	cks1b	1519.10465091072	-1.71757	2.46525821275015e-09
553396	mcm10	152.947720413312	-1.76663	2.52589194420829e-09
550607	itfg2	599.96930977789	-2.03018	2.5470433141718e-09
791143	rabep2	1269.13317498542	-1.82345	2.55398699388447e-09
562517	anln	1276.28251321075	-1.77242	2.59874462373654e-09
404732	chst14	431.319885606116	-1.70802	2.60499945764112e-09
560627	LOC560627	634.538982381441	-2.35777	2.62644349968991e-09
101885962	LOC101885962	39.173244763827	-4.16378	2.65243361589524e-09
406567	fggy	117.161986914452	-2.47402	2.68750292533373e-09
100329327	rfwd3	903.348874409867	-1.09676	2.69153992469114e-09
796025	zgc:162544	1550.77645053665	-1.52713	2.70943150244061e-09
335654	camk1ga	39.8540129926792	5.65098	2.75326966254496e-09
559103	inpp5d	2061.60113761062	-2.4929	2.77377180178853e-09
[truncated: 6,765 more rows]

## Sheet: INF_4dpi_vs_NonINF_4dpi
List of all the differentially expressed genes upon Salmonella infection at 4 dpi (p-adj < 0.05)
Gene ID	Gene name	baseMean	log2FoldChange	p-adj
368234	plp1b	510.934186081462	4.47912380898512	4.24530071668807e-20
677747	flj13639	105.562256898655	4.12216108355376	7.46996163489092e-20
569386	pecam1	1158.32137604127	-2.14065854557177	5.83242990464904e-19
30600	mid1ip1a	641.546097013845	-2.25750877937273	1.32054675855697e-16
100000492	mafaa	7845.5105070324	-1.73023673741878	4.81352239917053e-16
100535718	pdgfd	524.110137487898	-1.79384114264993	4.81352239917053e-16
492476	csad	687.996237077528	-1.88702873626034	5.7211846483408e-16
101882239	LOC101882239	104.293281290506	-4.18800673472423	1.42680741882253e-15
449557	saa	562.477830934009	3.06098106154591	2.00354334246267e-15
378458	rbms2a	373.966996778794	-2.22176393996133	2.30111008707921e-15
393096	lipg	1116.3252093083	1.87005397909344	4.06926445464327e-15
562259	rsph3	722.656130541844	-1.74805049283146	4.20510560973519e-15
406459	zgc:77112	245.951241583233	2.87578107792029	6.75617494783844e-15
791197	zgc:158263	1007.05669969042	-2.83429865924581	1.75889357823274e-14
559550	si:ch211-202h22.8	335.038913617744	-2.79638053412823	9.19612853143294e-13
436604	uox	219.663152818672	-2.18115469188773	2.85666916074491e-12
100330730	spata22	256.051212432619	1.98926642507769	4.56249497609606e-12
110437772	ptx4	362.382542572753	2.37478899057142	5.00064440502773e-12
571770	adgrd2	488.905080710728	-1.65919374200626	6.49985982996651e-12
100005849	rhov	628.478880408941	-1.56373125921996	6.95366769169718e-12
792084	slco2b1	8064.24704860472	-1.42480678293662	1.39156964762662e-11
322420	chia.6	300.876604258832	2.43113949067181	1.40610780242482e-11
101886216	LOC101886216	1211.74570850786	1.4430976525013	1.54183641786708e-11
394032	irx2a	164.430466265452	1.97014110088902	2.89005410332263e-11
494075	oclnb	2396.12137214427	-2.55811524650365	6.24008430553543e-11
100136861	cishb	212.274286667853	-2.60988414332117	1.15597295554119e-10
407680	si:zfos-1011f11.1	1725.74980770988	-2.08729740816352	3.01565434441201e-10
100334431	col5a1	864.074070428938	-1.53844817051739	3.83986436770038e-10
100141339	zgc:171509	297.201154553077	3.21976356792056	3.91870479310571e-10
100004180	LOC100004180	443.775905713949	1.76611987278684	4.56302953093843e-10
797346	spint1b	153.810920312048	-2.19963660405932	4.56302953093843e-10
550497	zgc:110333	1424.71982380009	-2.2105058883123	6.3685080303133e-10
566369	fam198b	336.298008175844	-2.25798508757724	7.4026579870271e-10
556181	slc1a3b	233.186403211136	2.71621462794331	9.73981450730941e-10
767678	cish	1057.79517848683	-1.47456264135772	1.00298175698565e-09
571124	LOC571124	62.6018338644011	-2.42180192567804	1.50406837736547e-09
569443	prf1.9	70.9761820389783	-2.47994112925992	1.57794682058369e-09
406777	aqp3a	4215.46347232141	-2.60672605683238	2.08381214800969e-09
692297	depdc7	584.755589070983	-2.2847464463621	2.3001179564763e-09
559754	tmprss13a	963.600318874198	-2.28381424589237	2.39713395129281e-09
81587	cldnh	3725.55730458042	-2.03190152166724	2.63094217536811e-09
431726	zgc:91908	630.506539701172	-2.02269871824806	2.78350469056177e-09
326281	mbpa	827.236633331865	1.94053910030811	2.90122816349717e-09
777616	zgc:154054	140.585270382261	-2.31144729323129	4.67119104507368e-09
563654	nos2b	87.1191940796405	3.18186027544662	5.50190808406812e-09
560341	mych	7532.77911410024	-0.915650124622718	5.59705924060613e-09
573631	rab11fip3	212.747282434742	-2.02688262549341	7.56179885098949e-09
110437729	LOC110437729	871.815316684303	1.3265540472573	7.98205959802027e-09
431770	mpp2b	62.2626502945397	-2.53845358949711	7.98205959802027e-09
562009	spint2	1649.35222377401	-2.01069064806753	8.31899835988243e-09
404039	npsn	486.686171038821	2.22924924875817	8.8435937333315e-09
795026	si:dkey-200l5.4	116.823200044311	2.68401684823354	8.8435937333315e-09
449615	gcm2	2107.94587084227	-1.97823113484061	9.83350288192794e-09
101885596	hck	10890.6432434536	0.791657459859227	1.02369792222851e-08
570003	nxph2a	498.282734740259	-1.93278000241918	1.03838456278061e-08
100317496	lonrf1l	4729.6177548591	-1.542329037688	1.1639765309923e-08
405757	oclna	2018.19376615365	-2.02426063936305	1.243686105885e-08
100148342	atp8b1	248.674155693918	-1.70590088374883	1.24932776469984e-08
792389	si:ch73-78o10.1	194.883639284274	-3.46759918029649	1.91914808021938e-08
567192	cd59	540.36234065866	2.49952555322802	2.25313615757636e-08
100000322	trpv6	41559.9149087715	-2.10473271379646	2.71075974084366e-08
100330048	brinp3b	290.642658796806	-2.16279288956998	2.97217774588431e-08
81584	cldne	4367.93895837893	-2.13137932974757	3.34373464387089e-08
100535694	LOC100535694	268.172942618889	-2.10492434138625	3.64669811769821e-08
559768	zgc:173593	623.909506585637	-2.12459823404788	3.88777174731184e-08
570638	apoc1	64152.8184188342	-1.92927491788948	4.2778059623337e-08
556869	ponzr5	2322.65474240667	-2.0939266590335	4.41059910013234e-08
325875	dgat1a	486.922935602041	1.83268939795898	7.01477547699263e-08
555744	grhl2a	506.739319555491	-2.20889607747053	7.41839536261426e-08
407989	adssl1	148.276312436953	1.88719550130869	7.53400295156172e-08
100148439	mcf2la	406.310585704283	1.48198985459826	7.92331445531711e-08
393364	ildr1a	1707.39435917786	-2.01327420947774	9.30703229111106e-08
368621	si:busm1-57f23.1	520.790709016732	1.89823670616119	1.08017593361897e-07
321928	phgdh	443.727546196356	2.24186565458689	1.1401226114555e-07
568912	dok4	360.741551635207	-1.53230362875211	1.30293335246327e-07
445070	cldnk	167.550609038171	2.00153077134126	1.33747096771881e-07
100536946	LOC100536946	14570.4968477658	1.57079058074493	1.44929108144089e-07
406304	gadd45ba	20917.3925840923	-0.974329576624287	1.59093129988467e-07
436763	ttyh2	157.814875197451	1.76636941050907	1.65360556668909e-07
393807	ppp1r3cb	434.858566643021	1.27153582037037	1.82670001513759e-07
559160	si:ch211-214j24.14	291.895751295566	2.13162816488578	1.96311551970505e-07
30314	apoeb	363876.848219915	-1.76685079815396	2.06241555800405e-07
360208	pvalb8	3933.43824998299	-1.38420734985222	2.15924092384276e-07
560593	si:dkey-159a18.1	4925.54767021392	-2.66615462644142	2.15924092384276e-07
564633	ddx6	1694.4469762603	-0.906187931271048	2.15924092384276e-07
793920	il2rb	310.639129900953	-1.80608559728624	2.42877379699382e-07
795321	si:ch211-202f5.3	213.823444704239	-2.18476524309579	2.42877379699382e-07
100006005	arrdc1a	420.417484197703	-1.74048581065853	2.737068297843e-07
101886585	si:ch73-264i18.3	1784.57573688639	-1.84405886346399	2.81025545702822e-07
246227	ptgs2a	459.656825404116	2.32851911852038	2.89272171447541e-07
447903	dhrs13a.2	459.494190544441	-1.8959792822725	2.89272171447541e-07
436703	pxylp1	500.665461255803	-1.75193965321829	2.89272171447541e-07
353358	anxa1b	331.078989808467	-2.88665245665631	3.12409527971045e-07
100151174	hs2st1b	176.976193640125	-1.83157759625025	3.1385121950721e-07
100002095	zgc:162707	718.834241646188	-1.8686117359439	3.91423270358516e-07
100170833	zgc:194125	27638.7635253549	-2.25441977046988	3.99543279320138e-07
790937	kaznb	301.319734259179	-1.90722270424533	4.35194128416512e-07
568476	g0s2	2948.14282749591	-2.27287441255496	4.36569547101938e-07
100148950	LOC100148950	73.0580999092894	-2.85622362298959	4.62128215761592e-07
494031	usp2a	2050.55355184671	-1.89133851376949	4.67679134725721e-07
407716	st6galnac5b	343.630611072846	1.56402396945898	4.83012804502109e-07
406588	sstr5	460.218212385577	-1.54819297581939	4.86238599674886e-07
560322	pdlim2	420.882507021277	-2.07965309058226	5.25125202947481e-07
335475	wu:fj16a03	25363.6952874244	-2.2936282568839	5.25125202947481e-07
107988037	LOC107988037	135.794291231733	-3.97591656935356	5.25125202947481e-07
100333048	LOC100333048	268.248596832849	-1.92957433212795	5.89341419989511e-07
114424	cdh1	816.061121047102	-1.42394662070457	6.62964690017694e-07
692332	cyp46a1.3	118.710267222428	-1.60620794329224	6.95525864900017e-07
335901	klf15	1010.43135949373	-1.51675164590206	6.95525864900017e-07
100000775	glula	93284.7000217509	-1.52541198918226	7.39113038729301e-07
103910196	LOC103910196	167.392498968052	-3.16214398733015	7.56570746045494e-07
554221	pthlha	151.128876085161	-3.40042310492799	7.56570746045494e-07
558938	si:dkey-30c15.2	359.474049029858	-1.75654981094336	7.56570746045494e-07
791793	cxadr	74.6214821955095	-2.51972890680032	7.64982628593487e-07
100330213	si:ch211-258f14.2	183.371243427611	1.72422707997108	7.94580413562737e-07
100535492	si:dkey-62k3.6	65.807680348631	-4.47706624566612	8.09674811407125e-07
557248	zmp:0000001114	614.939024679995	-2.11143472572043	8.13150357154992e-07
494487	nr1d1	9201.90855104292	-1.67609172915775	8.27206543599461e-07
100270758	rpz2	348.435404140877	-1.65347457227278	8.39298561702676e-07
494131	gprc6a	1719.04282700681	-2.37047681472379	8.68479602454181e-07
563405	gprc5c	1166.84359027629	-1.91719632863034	8.99557906508776e-07
100330638	mslnb	125.427479774811	-2.35267558470005	9.02680745559483e-07
560869	elf3	587.884434855534	-1.70633782962511	1.13419326032011e-06
561190	atp2b1b	681.087097350888	1.3922058100702	1.13419326032011e-06
798697	gfi1ab	294.184783182224	-1.61818108955824	1.14210234170103e-06
493587	pcdh2ac	2721.68681308763	-1.19015162211703	1.19413883952514e-06
100537283	ftr87	60.0886374215236	-2.44010500105549	1.21441599533709e-06
100007673	gpr160	213.742824553545	-2.14674695418044	1.30600516323717e-06
569335	si:dkey-33i11.4	7185.51912496241	-1.63436033011701	1.32621579740211e-06
100149100	adra1ba	92.2672523756688	-2.2947924603571	1.36149576814302e-06
568405	csf1rb	6711.09225494078	-1.10791562465745	1.76631149444862e-06
566739	fes	5633.41156894314	0.924037335490476	1.81277631341596e-06
100003142	rpz5	15526.9000636839	0.791892038558554	1.81804596188731e-06
568032	rbp2a	271.630191827576	-1.67138543241537	1.82827125978794e-06
563952	ccl34b.1	7234.05417093421	-1.68982914941116	1.82827125978794e-06
768299	zgc:153665	320.862503710166	-1.77865331967127	1.82923531895716e-06
101885014	LOC101885014	3713.55043076409	1.11432276692782	1.90523525315478e-06
100333855	LOC100333855	271.591168099419	-1.80074490222795	1.97620680783907e-06
550431	cldn19	104.259457656804	2.48633509249134	2.06267823560891e-06
100005937	prrg2	326.833105157281	-1.87373274843216	2.08815660297577e-06
100149472	pard3ba	624.730265032502	-2.07690874011818	2.36064750026941e-06
100329632	scarf2	161.377989364921	-2.10428797456021	2.48096442592991e-06
564030	bik	474.444545762436	-1.68610944448576	2.54247491808948e-06
564423	vsig8b	166.854672352767	-2.12308794320961	2.84164293364983e-06
100151416	cdkn1a	856.815934418986	-1.34263437475503	2.85970832934677e-06
560190	esrp1	461.39866959795	-2.33968079178288	2.95409516490524e-06
336965	s100v2	1212.76348515085	-1.839334584736	2.9572052766996e-06
368405	znf385b	145.646379105463	-1.96317534397288	2.96303047718118e-06
100884137	dicp2.1	2371.20433527772	1.42801740480393	2.99791234339568e-06
541408	prss60.2	194.814647084184	-1.63296491007346	3.04470356320293e-06
101883245	LOC101883245	383.755095177135	-1.88631837970078	3.04470356320293e-06
100170782	zgc:194879	441.699096383394	-2.51951343128099	3.04470356320293e-06
563926	per1a	1166.11159006575	-1.53715986798681	3.10280320383439e-06
767689	bcam	541.755614289859	-1.42990193868494	3.37800005170941e-06
561889	gra	179.559825831734	1.92399158774704	3.53871875028387e-06
560806	grk5	176.386196477058	-2.33618757726231	3.61366275189769e-06
796684	si:dkey-87o1.2	847.841826853593	-2.2004606588716	3.67205732006533e-06
798684	zgc:194101	392.773470863443	-2.43538409583617	3.75923183373494e-06
556640	si:ch211-69b7.6	80.0279009991258	-2.68027996591329	3.75923183373494e-06
556125	si:dkey-7i4.24	668.019871531987	2.25359755983398	3.95160028767232e-06
402815	nr1d2a	9681.31738650532	-0.963763268870658	4.15532371955398e-06
100005267	si:dkey-51a16.9	539.903800804234	-1.29808578531676	4.23708963970396e-06
445297	gna14	297.696476078834	-2.15106331074481	4.2996369519026e-06
445208	camk2d1	241.230310002278	-2.08741769686264	4.55316121607551e-06
100001421	snx33	536.403144122307	-1.43133977671948	4.74311402315345e-06
101882436	ogmb	2706.50746279248	-1.72482302499946	4.74852226928774e-06
100000389	si:ch73-347e22.8	397.132122158142	-2.22316869426513	5.36957779891641e-06
100073342	f2rl1.2	403.811385706014	-2.01552159769866	5.36957779891641e-06
798892	cxcl11.1	2977.73350133027	1.34894360330554	5.84299921022883e-06
327274	elovl7b	129.045373392757	-2.06542446673998	6.08798559628177e-06
322903	nanos1	2338.70925676211	-0.968094616582278	6.35516700450033e-06
798864	pla2g4f.1	1140.77061133536	0.977562799357427	6.43823708051392e-06
368397	pkp3a	454.806425229109	-2.06631930262881	6.43823708051392e-06
798849	si:ch211-217k17.11	524.584303353729	1.39199069001515	6.81986059596996e-06
100535763	tmem265	122.232802801489	-2.40980776621526	7.16363683308295e-06
560304	susd4	142.882363996008	1.77366307819583	7.16363683308295e-06
692291	foxn3	92.7175273383956	-2.08954395690894	7.50288735242751e-06
100001416	stard14	190.501725030776	-1.97126252339043	7.61782348662487e-06
799158	si:ch73-127m5.1	72.1118825669997	-2.71831886000277	7.69626628464345e-06
550503	vsig8a	77.9773905042794	-2.39063392951289	8.26091323603923e-06
497646	gadd45bb	6621.10785274952	-0.96169248412539	8.3957722919678e-06
447845	cavin2b	360.579625519749	-1.66726885391225	8.3957722919678e-06
335888	mylipa	1073.98485544093	-1.33336438149049	8.39817312958527e-06
641492	sh3d21	3372.39012202108	-1.5934222996182	8.56462548339494e-06
402977	tmem45b	499.405777254756	-2.62102583975204	8.87106599570444e-06
406738	cfl1l	2457.82270843553	-1.79029838008166	8.98680813209985e-06
30458	gata3	2899.57417209672	-1.6794510459816	9.18806281727198e-06
100002203	si:dkeyp-13a3.10	378.867787658708	1.28187915004472	9.32877917400625e-06
100005359	si:ch211-286b4.4	345.892717521995	-1.07813622780963	9.32877917400625e-06
550508	grtp1b	412.33734433995	-1.68550324957943	9.35564955028544e-06
641321	snap23.2	1942.36048937863	0.879780561167179	9.41063952030435e-06
567239	scn4bb	956.725381492122	-1.36117148125044	1.07244787916857e-05
436598	pls3	453.67732716708	-1.90965321183697	1.07594189369871e-05
553374	rab11fip1a	398.230458471396	-2.1717610809336	1.16299764483361e-05
561520	fam83e	252.691558353909	-1.74412600674075	1.20060077844938e-05
558079	si:ch211-195b15.8	408.991026575988	-1.50159304819983	1.2356541383796e-05
334253	trim35-27	81.6438414910353	-2.87608655247218	1.2356541383796e-05
100142639	timd4	486.567416420572	-1.31947245297881	1.29598295410555e-05
321330	rhpn2	520.036528960485	-1.85566173632461	1.33231167180149e-05
554458	zgc:100868	1047.51404817807	-1.84123911431723	1.35029949956121e-05
564054	usp2b	609.34862228953	-1.87284284344907	1.37691441951176e-05
402821	cx30.9	118.526624023474	-2.2427313458653	1.37869263729241e-05
393380	tspan35	2556.61475833094	-2.01455738661897	1.39475019136289e-05
550380	cx35.4	86.4645339030839	-1.97006751907086	1.41212835234567e-05
447825	mfsd6b	414.947327691659	-1.76592777286186	1.47648932971947e-05
571948	nr1d4b	149.339702092698	-1.2248848516851	1.53159509235141e-05
393501	marveld3	103.383206057975	-2.1128268021734	1.55718280290565e-05
553162	hs6st1a	266.880037506904	-1.34957871715464	1.63129791182108e-05
393776	cox4i2	463.895192855982	-1.51872048819842	1.68743693590808e-05
553218	lsr	419.822653426	-1.79523338356964	1.77356408663603e-05
445134	zgc:100864	540.828523561264	-2.01673517929996	1.77356408663603e-05
559377	bspry	145.549671425388	-1.85561757187784	2.01187163967224e-05
30363	fzd4	87.3463718456735	-1.80163080596143	2.06772764813363e-05
561563	nuak1a	1073.71415235147	-2.13028320101268	2.07492631974477e-05
447819	eya2	1617.89599845507	-1.68006714704577	2.0949294417674e-05
103911757	LOC103911757	36.2129600145498	2.62791819795193	2.14621681205806e-05
767681	btr12	414.646053139071	-1.88221426717582	2.14621681205806e-05
497312	cobl	217.740083819441	-1.45051201097848	2.14621681205806e-05
393219	sh2d4a	685.131122693977	-1.55620021161725	2.18216258377408e-05
553515	si:ch211-95j8.2	627.705897862846	-1.80338912828582	2.18216258377408e-05
100037319	nme8	81.1600162195089	-2.78110823069471	2.31534526399339e-05
101886901	LOC101886901	157.34820357077	-1.7411869154865	2.39835094472819e-05
566880	myo18aa	72.3016171129826	-1.71263500908436	2.40340895170719e-05
100330243	LOC100330243	1169.76624850629	-1.94434036723254	2.45193517951476e-05
572016	pcdh1b	316.086257295716	-1.58929742757001	2.54445873979676e-05
101884183	si:dkey-191g9.7	391.886188350529	-1.7466591747993	2.56843662246368e-05
100330782	tmem79b	257.701040748799	-2.04585974090938	2.62348187210797e-05
100270763	scpp9	34.7370073146909	3.88509705165971	2.68298329182137e-05
566546	plxnb3	202.675797760457	-1.59267217745144	2.7101715769618e-05
101886833	LOC101886833	918.565702939857	1.58216343594353	2.75307408037479e-05
447824	gdap2	6885.17822075054	0.691069160001331	2.95562210426838e-05
556256	camsap3	177.435648177762	-1.65885719685939	3.11034329653309e-05
325938	plxna4	178.9764053278	-1.7565710840676	3.11034329653309e-05
100332737	LOC100332737	206.102422002375	-2.13606883801494	3.14024600411362e-05
561679	col11a2	632.102337536708	1.57679842601237	3.32183566904542e-05
103908620	LOC103908620	933.162711438243	1.41894936062158	3.36144095103954e-05
100002762	dscaml1	600.475724099434	-1.91740377545615	3.46226795374002e-05
323528	dennd5b	1474.7288126399	-1.48384038073139	3.70088820221362e-05
558601	pipox	43.8006941092926	-2.73731996419503	3.70088820221362e-05
101883154	LOC101883154	73.190239894727	-2.32458259891225	3.73605294785646e-05
568018	rpgrip1	96.5854532664802	-1.60055064279368	3.7639988965616e-05
492802	rhoua	772.446016924346	-1.64108426803446	4.14180993513014e-05
561012	plxnb1a	1397.83910530504	-1.39824535512936	4.21015011820657e-05
100137122	zgc:172065	149.566828670188	1.55929303038515	4.28441248653082e-05
100302404	f8	587.435315300523	1.74021363486509	4.29446446405814e-05
100332384	si:ch211-215e19.3	962.338871176753	-1.48149644845318	4.61586710239569e-05
561336	pcdh17	720.994880736149	-1.78933569107669	4.61586710239569e-05
796449	si:dkeyp-98a7.1	384.344257314467	-1.48436903881868	4.61586710239569e-05
101884643	zmp:0000000924	146.481219765713	1.69983967707265	4.76314015938442e-05
568891	si:ch211-79k12.1	2229.05853641606	-1.08142016128903	4.78863950124058e-05
431748	dbnla	79.5439651969375	-2.25569548630025	5.50737953641905e-05
503601	zgc:110788	84.8746460987646	-2.20600722832507	5.5668374005479e-05
101884238	LOC101884238	69.9505742699012	-2.0799727662778	5.5668374005479e-05
140618	tfap2a	236.212458853337	-1.0864952647789	5.88039002941228e-05
564783	sostdc1b	73.536185777145	-2.19626402479861	6.13252629639874e-05
562904	slc9a2	334.643281781254	-1.68330855468305	6.34866719297951e-05
566658	si:ch211-117m20.5	2285.20621649553	1.49805032160612	6.58991320887933e-05
100320028	plat	72.09559517962	-2.81912467334029	6.58991320887933e-05
337243	sept9a	447.832342433252	-1.64081326106969	6.6087553285786e-05
563432	si:ch211-79e4.4	805.86708937873	-1.21383245279321	6.64951433377752e-05
563122	marveld2b	270.664392407201	-2.21635155277779	6.74084707482442e-05
557551	hipk2	794.922886100322	-0.920140707616185	6.8076581680128e-05
641564	zgc:123295	533.655190379679	-1.87315515914951	6.81632790510964e-05
563897	abo	151.0000115525	1.4218009307217	6.85003047071721e-05
447897	ap1s3b	458.614641985921	-1.62861192768076	7.08493554825521e-05
171478	fabp3	5603.65402665121	-1.59896484555477	7.23798455932952e-05
246093	id3	1569.26112554241	-0.988274281122255	7.79241358302056e-05
100333601	mmp25b	2336.09195360532	1.22523606255571	7.84747009550267e-05
100151013	si:ch211-198c19.1	219.050738437095	1.19369311699036	7.94432390100222e-05
394007	xpnpep2	2513.32511580014	0.746080174043424	8.15996666611762e-05
406767	sh3bp5b	499.997257158413	1.71521518307778	8.97914055766369e-05
553062	si:ch73-70c5.1	338.881834366459	-1.69185824743683	9.10005542542878e-05
798008	acot9.2	77.629695378872	-2.33291234758508	9.2733962239917e-05
368242	kmo	159.477158258271	1.39010136303931	9.2733962239917e-05
336303	ppdpfb	37301.8450151513	-0.946157145508069	9.33591714613668e-05
100334689	LOC100334689	52.8839233044685	2.63851501165837	9.95779478002431e-05
100333627	gas7b	1564.45779683029	1.15053027424864	0.000102154177202404
100536813	si:ch1073-340i21.1	293.523078674172	-1.5085653679837	0.000102652357685487
100332249	ecm1b	2174.90330789594	1.21007331865719	0.000103178530165071
334500	scamp2l	457.513974151325	-2.07152296851914	0.000104155955916163
393515	stx3a	451.339527235943	-1.53733933871426	0.000104937891043293
555578	rxraa	2259.75797306361	-0.932029528838918	0.000104937891043293
793825	igflr1	3618.97826512757	0.9360885669205	0.000106830161976125
572235	wu:fb18f06	6534.15213371543	-1.4373412568144	0.000106830161976125
436712	tspan18b	664.271209007605	-1.0773960105687	0.000106830161976125
562569	plcd3b	200.062009575088	2.22708745677433	0.000109871847329497
558146	mfsd4ab	19.5618555395702	7.39242631737543	0.000110538920079968
352913	selm	518.779616180468	-1.41297195439489	0.000116164598775937
337730	capn8	3165.71941604865	-1.88289629695096	0.000116164598775937
553524	b4galnt3b	209.218667454155	-2.4154705899539	0.000119487467302657
100333111	LOC100333111	137.344805766224	1.47864669142943	0.00012273657151025
337489	plcd1b	382.650104876135	-2.08949956236098	0.000125460261643474
567592	smpd5	380.886119205264	-1.45037954429233	0.000127523854624444
767737	foxj1a	22.3118587140498	4.70526202014342	0.000128744118268897
100034506	tmem238a	386.918361121691	-1.64163621893789	0.000130890222545681
560512	si:ch211-119e14.9	135.146233970118	-1.4988174516477	0.000131963283678794
368288	rassf7b	351.671199609075	-1.56952787352308	0.000131963283678794
58084	tnnt3a	315.765799716055	-2.46803595839622	0.000131963283678794
387303	gbgt1l4	368.528420904072	-1.39544930089299	0.000135488018958976
556994	ppm1la	1235.104976145	-1.44944244137145	0.000137223000072434
436639	tjp2b	305.222456907922	-1.14160578669891	0.000143251576437586
103911370	LOC103911370	1773.03092419298	1.4575412115004	0.000146655393088434
569894	prr13	1036.21883020563	-1.26743687280434	0.000146655393088434
105665598	pigrl3.5	134.219525137133	-1.317655923789	0.000151639423786659
561689	magi3a	499.437428450799	-1.66621670167246	0.000160690650842764
81585	cldnf	805.060612820386	-1.72459004224624	0.000162452761425292
559555	si:ch211-217k17.12	1326.95568464998	1.0392987163761	0.000167242538120946
561906	chrnb2b	148.229780520611	-2.67011285155045	0.000169749514476471
553673	zgc:112038	194.342701782805	-1.31244143417505	0.00016991991702174
569931	cadm1a	229.815479075928	-1.78181871792834	0.000171079917163882
338307	ftr82	196.573207626242	-1.70558441344188	0.000172107569750629
561123	fam222ba	336.387779272277	1.36881723092725	0.000173322564507197
497576	ttc22	32.771405014015	-2.13559198305593	0.000175933587129957
550425	b4galt1	484.656206437704	-1.11590192284019	0.000180360514962798
566599	si:ch211-117m20.4	179.59910311471	1.49602482938334	0.0001836401821235
541486	mfge8a	2371.054103003	1.53405147899398	0.000183845327253167
795597	si:dkey-222h21.8	16.6354135921662	-3.26798476883474	0.000185421641329744
503735	eps8l1	89.9291457739425	-2.22905566637632	0.000185469559546216
558500	oxnad1	2232.86490972837	0.943103724083479	0.000189009519162151
327204	rac1a	3959.44375514521	-0.858698983066767	0.00019034392028576
405875	zgc:85932	62.5767159435028	-2.07386776704533	0.00019048724950398
100000956	golim4a	510.27310628847	-1.78260910253421	0.000194586020330585
492766	svopl	159.119357504804	-1.58603187282243	0.000197647346312847
791612	mat2ab	2221.96431193801	-0.908570910178474	0.000199235280338366
564750	pi4k2b	2552.61019996209	0.734591316527895	0.000200033054306761
563060	s100u	266.423572156497	-1.13978265080301	0.000200033054306761
100317614	arhgef38	119.032694615757	-2.07343673072871	0.000206005853055455
793480	kcnk1a	165.068525128337	-1.89395947409923	0.000206005853055455
368917	adam8a	5620.12289608286	1.46955317127064	0.000206005853055455
30679	prox1a	737.019809993605	-1.5710620477051	0.000206005853055455
678612	zgc:136892	206.112996395004	-1.88180352313983	0.000207146011753891
797181	LOC797181	200.3044553551	2.34347446149565	0.000209276403677071
445506	emp2	1031.79456461322	-1.52236975825201	0.000210770689331143
474346	mag	151.907862417722	2.09819084137625	0.000223191695843122
100535673	si:ch211-198c19.3	5169.73505003115	1.56444704465288	0.00022562789172432
571757	LOC571757	135.518912551229	-1.57580105262173	0.000231728586213455
324942	grhl1	1142.23901573074	-2.04880276886456	0.00024270177812921
678546	sptssb	449.313382484065	-1.30426383836567	0.000243798576747574
796100	slc7a4	44.4920435601586	-2.48206349437099	0.000252549997937885
567909	LOC567909	100.510291103126	-1.53254791870509	0.00025596357600857
327368	rgs14a	4398.2026838411	0.559176505303722	0.000262061077306292
335521	efhd1	871.704164420501	-2.11151720828672	0.000262061077306292
664761	id4	1180.56121999555	-1.29827750433155	0.000262061077306292
792470	ccdc153	29.6118439717188	2.76262680480213	0.00026243880736739
100536790	LOC100536790	76.3822246261577	1.65736675417118	0.000262898616154039
777630	tmprss4a	929.201349655311	-1.67950635491864	0.000263424037966892
561247	shda	69.0297887574113	-2.15173044957892	0.000274394708472242
567134	zgc:153916	78.3640859874851	-1.65790684159394	0.000278612140612541
100333566	frmd4ba	403.930426904529	-0.977936807533543	0.000278612140612541
101885685	LOC101885685	24.2435116436029	-2.96775552721119	0.0002803025761737
559330	fam13a	9349.68497555534	-0.874308745698049	0.00029459717111185
83774	cry2	1433.9811412629	-0.978988407619196	0.000300778307673039
101886937	cxcl13	64.0181236888794	3.8102493273936	0.00030139412505165
100005752	cgnb	126.200487395009	-2.02030597183319	0.00030139412505165
557460	gb:eh507706	1348.5863352467	-0.891435324260804	0.00031754468647481
569109	dbpb	587.309927596929	-1.29595582241911	0.000322141746154336
799099	lpin1	1613.27263796615	-1.77494479385347	0.000322141746154336
437022	tyrp1b	122.325844476036	-1.77469442261886	0.000328722344171499
100150414	si:dkey-85p17.3	2088.25310756683	0.629242434614447	0.000346315724997293
492758	fgf13a	334.00608505381	-2.32397492073861	0.00036470731709403
402965	eepd1	5464.20808678552	-1.03985532036333	0.000364770769813234
557902	adcy2b	277.427627802267	-0.950882981096049	0.000369207543500191
101883865	LOC101883865	23.7473897760828	5.24146748962509	0.000379546177237244
565041	pim3	422.861605612848	-1.5342431514277	0.000382745064406467
378722	rdh10b	1875.86887166973	-1.02834752971788	0.000398104989967205
796425	card9	1625.00774633024	0.700504386720819	0.000398104989967205
571837	zmp:0000001167	318.801242309138	-1.65103436927546	0.000404053500139392
492494	vsnl1a	563.589721220311	-1.93483828434484	0.000407221997718788
386700	stm	58.7913505307495	2.14948836329553	0.000408805813586037
568416	wt1b	91.8283768437323	1.46532508698096	0.000411935567224569
100332245	cobll1b	408.745494908255	-1.89075952045543	0.000412471521367699
557813	zgc:194930	179.984467917302	-1.42313989051439	0.000415215825591684
334219	zgc:77650	1626.54684182472	0.851292197279654	0.000416146404475183
796128	tmem79a	168.922123513414	-1.43501198365744	0.000418752560879525
560413	mtss1la	829.347438919481	-1.14708706843777	0.000422737036825209
142986	ptk2ab	190.961534521032	-1.58113818977173	0.000423851077065703
497601	tnks1bp1	238.789708026486	-1.36212156345452	0.000428676000150548
436597	rdh12	204.609227817154	1.15346130529095	0.000436156294164835
791132	csrp1b	15.5516524204437	6.08828810987076	0.000439989806861415
101883471	LOC101883471	464.687611737524	-2.11010827123489	0.000444090368787654
81581	cldnb	2229.88407561713	-1.63531323821334	0.000454954648314705
100536902	lsp1	70.7878160198635	-1.8016740510415	0.000468352455234495
101180909	shroom3	66.0922625848149	-2.8792113749911	0.000484280866998423
393993	ralaa	236.630409071633	-1.14826438444834	0.00049270453861614
767718	sult5a1	4106.66456919003	1.6042491122358	0.000508782470054634
569201	mal2	153.939458897027	-1.85599698112971	0.000513823422791194
553811	sh3d19	60.598125367273	-2.09857934506153	0.000519471165162598
81880	anxa13	252.180884448033	1.47535015682195	0.000529136626492353
393906	nt5e	148.758350022152	-1.76290695548661	0.000546135276016704
403114	adm2a	51.9236132889674	3.95045625432524	0.000551329190605928
678605	crfb12	56.42776351764	-2.44359058097489	0.000551329190605928
497165	nek6	839.860446485361	-0.694847808064336	0.000551329190605928
373089	tjp3	361.039199143116	-1.91974453604552	0.000551329190605928
170846	appb	2607.98133264298	-1.24069502090266	0.00055232234162555
100536897	si:rp71-1h20.3	102.188832278907	-1.70885173344381	0.000558312887803859
100141352	kremen1	187.575254684794	-1.65115132696717	0.000563196485484125
334582	vdac1	1440.33258597616	-0.742093505901028	0.000563196485484125
557665	pvrl1b	522.73650479702	-1.15732008635249	0.000565184463431061
100007510	si:dkey-24c2.9	9.47524892558102	6.35407758042081	0.000573816364975504
553349	znf185	823.30386194371	-1.6071644970314	0.000608105317654854
777640	zgc:153929	73.757754990974	-1.99920107852516	0.000616329761709338
58128	fabp7a	966.692151665832	1.05478634223057	0.000616329761709338
100332627	epb41l4b	303.517616314868	-1.60922235856465	0.000619739845028085
100034367	utrn	482.951312482783	-0.936405096648186	0.000619739845028085
558721	LOC558721	6292.20809475395	1.12942257621293	0.000637295265882222
567346	uhrf1bp1	258.474475474482	-1.06556629708575	0.000639444784558622
324910	sema7a	292.688757311572	-1.46848633219474	0.000642726042742799
100001836	itgb3b	54.7655583295604	2.09989887256917	0.000644650076735658
100149838	pycr1b	272.853417547688	-1.03477411396202	0.000645674055049275
570956	sgk2a	321.257826911865	-1.20473993149444	0.000649429058782284
564539	si:ch211-225h24.2	176.513815748206	-1.77563411671171	0.000652561084572501
100005110	c1ql2	1243.04148097223	1.28398228222492	0.000661786569075227
30691	ephb4b	143.191054762996	-1.38074400087785	0.000704091802535128
566745	jac2	135.172168993234	1.90378001566423	0.000720398527452269
570761	prkag2a	296.039388322707	-0.974761120095882	0.00072943045253352
767680	zgc:153760	18.2521776293679	-5.60552328254882	0.000731800993175735
449936	ppl	781.868841712222	-1.74638055379999	0.000744009991962463
558816	LOC558816	983.33052077252	-1.87858409661887	0.000763899370064714
795914	si:ch211-278p9.4	123.795212924623	1.77736216426517	0.000763899370064714
794486	krt4	9821.29267013011	-1.59697450305511	0.000770013926973452
100331484	LOC100331484	10825.4752900084	-0.886089545633312	0.000770013926973452
101886910	LOC101886910	40.8995659771734	3.95930637160557	0.000773246569277795
369193	aldocb	18267.8610058602	1.03339745569963	0.000781984233776007
550519	rgs5b	1797.0054209128	-0.865778526881532	0.000785592801010209
100333474	LOC100333474	148.70255489702	-1.79802541171141	0.000796179275219461
393155	osgn1	1880.42801011648	-0.908995008139892	0.000802226643926987
571228	znf326	103.271243810761	-1.76659709206796	0.000803099203862944
100148254	LOC100148254	2805.15752989577	1.36931996590557	0.000808181135689505
336348	rcan1b	5544.14058441433	-1.12863468965619	0.000812769157732211
100537750	foxq1a	179.14939569795	2.04559693611105	0.000829288873129965
569081	rerea	2644.75477002734	-0.686879112348202	0.000829288873129965
323681	tmem154	4802.81494422046	0.520399780184039	0.000838107174957286
100149618	p2ry12	2214.66144380547	-0.725771887347427	0.000844017091907262
567956	lpar2b	521.136087933314	-1.37846672183436	0.000887279807360778
550482	zgc:110353	61.3792727806027	-2.02282590880924	0.000888396066321042
619272	zgc:113314	1857.63758162062	0.913918871009375	0.000888396066321042
568764	plekha6	394.036865883917	-1.64982432394069	0.000888396066321042
570828	mgat3b	1522.40805821752	0.773154716381963	0.000890464408860068
100007937	si:ch211-284o19.8	24362.3825820441	0.865998396783345	0.000892998281848447
30582	opn1sw1	3943.49572010609	1.78771558468445	0.000897080247810387
100331195	il17rel	327.711221611269	-2.03457039244563	0.000897080247810387
393570	irf6	244.468226103884	-2.28773673686559	0.000903066399191637
108179356	LOC108179356	203.455167660733	1.96564961715405	0.000904609152355152
336351	prg4a	363.227568814382	1.33550504025491	0.000906100187526039
100538151	LOC100538151	405.722051726593	0.862417417337562	0.000906100187526039
30296	foxo3b	3398.57552558558	-0.707023453564876	0.000906100187526039
566118	adora2ab	312.103920059538	-1.73812365135545	0.000951166654986765
325958	tsku	1728.49768019115	1.19160103874518	0.000954050787053882
393814	plek	19378.0151851539	0.582146684327875	0.000959672037624738
335836	slc1a2b	1264.83738689315	0.77336881273639	0.000965185460234665
326923	rab28	112.514740601854	-1.24871242213899	0.000965185460234665
567762	myclb	233.600772848545	-1.1600622719979	0.000970634330386976
386792	padi2	2255.83384229856	0.753312423871123	0.00102757079256935
559050	sgk2b	2305.96698753007	-0.879482841472691	0.00105125761561896
100192211	ccl19a.2	9.34185432097763	-6.27820711254925	0.00105355782380195
402831	cyp27a7	249.676824335343	-1.25047561663268	0.00106370835406695
30612	bmp4	140.148759910864	-2.11206962762066	0.00107869387259838
108180759	LOC108180759	36.8766665025144	-3.03015617344469	0.00111488835322511
100320357	ttc39a	117.732981101222	-1.44264976302069	0.00114343885213925
406448	mpzl3	239.679378578971	-1.35834286950097	0.00114361155523673
494490	slc6a9	3720.22388837719	0.942012927764611	0.00114776044464718
554305	lta	88.8703588452601	2.23282053290123	0.00114776044464718
406351	ripk4	254.678690450925	-1.71448297994784	0.00115798297949105
327462	hsd3b7	304.040585551273	0.884437577450046	0.00117081999573948
570508	crp1	19.0431974537021	3.59252841608127	0.00117337307482185
30967	igf2bp3	4016.61516407617	0.629456675194488	0.00119112542729987
796455	col4a3bpa	189.76118316139	-2.0661603661892	0.00120607873873941
100535674	LOC100535674	5929.48281332679	0.687600681183769	0.00121058712161687
562473	ncf2	7583.56297653535	0.887985776183636	0.00121645097880845
556807	si:ch211-186j3.6	143.584300597041	-1.21696850717311	0.00129569506750713
403027	snx10a	4176.09721679667	0.819480457844607	0.00129569506750713
406363	scinlb	23529.9871148556	1.20351442152466	0.00130316546752887
108179043	LOC108179043	83.513396154462	-2.72848255759766	0.00132705005128424
556502	adma	315.968373241551	1.30922077204707	0.00137375833556106
571252	adam19b	1110.98819310366	1.72171834562728	0.00137375833556106
566781	aim1b	141.837141738047	-1.60476034965552	0.00139252975535778
794438	si:ch211-282j17.13	91.7839667199059	-2.3250428890045	0.00143650326809885
108179114	LOC108179114	4843.22578075766	1.1486117278926	0.00149446917232715
415197	nudt15	717.240517135624	0.757383397504951	0.00151347930344871
100003900	chia.5	24.7804549746172	3.2347750181095	0.00151781509561941
110437731	LOC110437731	510.397688482959	1.58150188620782	0.00153047166493574
795084	igfbp5a	3217.27315928426	-1.61455605673349	0.00154201401862601
557356	mkl2b	819.768721191339	-0.810923794568786	0.00156836852046989
100332699	LOC100332699	287.973900064793	-1.12210343394793	0.00156836852046989
103909362	fam177b	96.7542795223022	-2.47357572863143	0.00156836852046989
334217	elovl7a	43.1395475812851	-1.97515352862012	0.00159202161100935
559737	illr4	643.571647582766	1.97504233209054	0.00160703584907322
554836	cry1ab	1141.60280556208	-1.11469063421397	0.00168830375931577
553459	dock6	318.184662365708	-1.07308131605677	0.00174532232590716
567758	rltpr	77.7407721876195	-1.85786906988597	0.00174560783877099
791170	nol4lb	856.772119340718	-0.78150236525394	0.00174579799109213
100142654	si:ch73-52e5.2	598.500909521226	0.639351812292013	0.00175459875606519
100334731	LOC100334731	34.3967997654799	-2.13169166383317	0.00176024380038286
100149080	LOC100149080	137.099798553688	-1.98679133497141	0.00177098799038685
406737	cd9b	5607.66587093756	-1.07304632375213	0.00182927820224586
100331190	LOC100331190	54.0822247431501	-2.64961328928573	0.00187232516027401
101884988	si:ch1073-209e23.1	88.3323364146433	-1.5583885998898	0.00189974013954114
449990	phlda1	163.378415303987	-1.83061117911406	0.00191784423209877
30271	nr1d2b	10575.5808239985	-0.75814503222374	0.00191784423209877
100006557	LOC100006557	724.492883242392	-0.916806529334054	0.00194644567909558
100329707	farp1	1638.5432593534	-0.682531335197383	0.00196044495873484
450033	lrrc23	22.4389145398885	2.72589244669786	0.00196756186346281
322506	nqo1	362.367696576802	-0.937745270292769	0.0019677055592859
436937	nipal4	655.082809277432	-1.55313454767204	0.00197109601462114
393892	bzw2	8002.08648676293	-1.30766197021033	0.00198977208605486
58109	valopa	71.0472379236981	-2.65129971264584	0.00199845149056772
569162	si:dkey-33i11.1	616.181035562078	1.45179820305338	0.00205024542772114
100534921	si:dkey-17e16.13	131.908035138184	-1.78857018930593	0.00208970878492937
559237	si:dkey-61p9.4	39.9442124913385	-4.33105655066571	0.0020976794130506
405801	rbm24a	331.304997384855	1.18865035583969	0.0021061336872715
556126	gal3st2	72.4822614644881	-1.56098547094049	0.0021074616001916
556280	cyp2u1	172.426153830066	-1.12675263394662	0.00212991119222
30498	egr1	9025.90888167674	-0.912624464926921	0.00212991119222
553607	camk2n1a	731.694110420174	-1.52984172488076	0.00213298855102242
436825	s100b	41.6101187336785	2.48977510966741	0.0021562240102323
557459	igsf9a	142.459957541282	-2.09965154847777	0.00216533249493072
101886060	kdf1b	103.417645662978	-2.42007324363643	0.00216533249493072
100334238	si:dkey-182i3.11	1439.64795573153	0.699754028920302	0.00218152486011178
335127	tanc2b	108.06139838043	-1.25231110362852	0.0022451472209624
100005670	mmp28	597.258078864952	0.815564981656455	0.00226332239852762
100538001	gpr75	156.674091691326	-1.84657537196298	0.00227111434169398
565630	si:ch73-95l15.5	199.553417866708	-1.44722934049972	0.00228910444268405
565844	rhobtb2b	64.2843614187317	-1.63536715105168	0.00230054166004985
393412	klhl24b	418.277787439443	-1.39081996594093	0.00236474264203259
571549	kank2	247.791658156258	-1.01879548508511	0.00238397245837676
550561	ppp1r14aa	146.8642308961	1.10360081370951	0.00241953352106942
100004033	LOC100004033	387.655668859003	1.08265896654551	0.00243110436980604
792667	si:dkey-276j7.2	363.696209008444	-1.24414001180021	0.00245769737671929
563601	tm4sf18	7.41028169768121	6.00119402379813	0.00245769737671929
100004603	si:ch73-14h1.2	647.061787687337	-1.21366929251765	0.00246852133547333
563577	ppp1r13ba	514.744839683219	-0.953361803642635	0.00248980796974679
30472	rx1	160.782580899164	1.45520598775475	0.00250073610107197
561338	pde11a	23.3891458044236	3.32676173951571	0.00254889477183011
352941	zdhhc8b	141.089378196973	-1.58699508627415	0.00258869096429898
447878	acot7	1063.99494474551	1.01630800415404	0.00258869096429898
557524	unm_sa1261	71.5377463198627	-1.88162409677715	0.00259068576934454
100329330	rgl3b	54.0415584091765	-2.17157501543452	0.00264244074149791
101884755	LOC101884755	35326.67025753	0.796827724784156	0.00264244074149791
641488	ugt1a1	177.599587266469	1.08440060029344	0.00270058824202279
100150814	ksr1a	177.818288803972	-1.26438949276346	0.00270058824202279
564009	ciarta	3796.10843627258	-1.25941500394095	0.00271919564280281
108190486	LOC108190486	28.4597950845524	2.87572157630842	0.00271998409895151
100332206	stk38b	63.6857396127604	2.23591356007511	0.00272484027009184
30447	ncam1a	253.524507272655	-1.19056671567566	0.00273974944830368
564660	LOC564660	6.21929742504997	-6.43862221981277	0.00275001892928857
798430	tmsb1	2492.45494652119	-1.10914064012257	0.00275001892928857
447859	etfdh	3325.65227378623	0.48889051130202	0.00282269690878447
100007661	paqr5b	46.7719004411508	-1.70833449738656	0.00284747618090651
553646	sptlc2a	8771.66663456701	0.642426571670834	0.00284747618090651
100334140	si:ch73-170d6.3	628.198687633716	0.76489982347446	0.00289795981407841
566832	dpp6b	117.202448661854	-2.4270616967689	0.00291927388390601
567402	myo5b	217.809237010424	-1.53461383171466	0.00291927388390601
777737	clstn1	488.604071952657	-0.946711442663648	0.00292049799281464
65233	six4a	372.37529881128	-1.59110841345842	0.00293052994178648
567643	kif26aa	17.1994073969974	3.03381545417948	0.00300714525939789
100001225	st6galnac2	72.6014624381846	-1.97786797987885	0.00300838754089367
436920	egr3	7968.25563473625	-1.18975395690223	0.00303649949727719
30436	eya1	93.8338904837273	-1.52102162464949	0.00303875304803933
101884800	LOC101884800	364.054037807387	-1.38438946779647	0.00311230675459332
445085	rasgef1bb	110.124714735325	-1.56426635458697	0.00319265619121987
100332380	cers3a	73.1957102982791	-1.52725490635349	0.00320301504107318
245702	igf1rb	65.1646408511824	-2.2382857275541	0.00320301504107318
30286	ndrg3a	3855.51209791578	-1.38688161708083	0.00322397087257961
100333265	LOC100333265	79.228945433177	-1.41230404690373	0.00322397087257961
100333266	LOC100333266	33.3724125161652	-1.96323561046296	0.00326132926226298
553326	hacd1	249.110317958321	-0.918208151547278	0.00326132926226298
100536585	si:ch211-137j23.9	712.584368581689	1.81998307453065	0.0032734123685084
393813	pdlim7	127.394827192449	-2.13765067252504	0.00330018979645947
100331179	acer2	315.376129140043	-1.20101880400669	0.00339499394783252
570584	moxd1	15534.9275774428	0.819138763948215	0.00340538421238053
403021	ap1m2	391.255525051923	-1.68753334327456	0.00342937820320534
565446	tjp2a	609.739068621555	-1.82275766250034	0.0034597744850918
567620	si:ch211-95j8.5	39.7628616942782	-1.68362384057791	0.00346567347472164
192309	tpi1a	175.414293961306	1.41445645118652	0.00346567347472164
447904	ildr1b	286.940348817958	-1.68002242344767	0.0034892081337957
393735	gchfr	80.068908786897	-1.71447898055697	0.00356707787328475
394091	sh3gl2a	204.770765511919	-1.55215598255512	0.00361504952997722
100004225	sb:cb230	361.384850150007	-1.03375978930791	0.00361637467715193
562670	klf5l	141.279656601162	-1.52507395957395	0.00361637467715193
100004155	fam110a	100.175176365736	-1.56864728449177	0.00363732000888621
560295	si:ch211-102l7.3	12.9772339406239	5.81690281192549	0.00370440637757504
100537857	pstpip2	8555.17155588346	0.540790472950945	0.00375408350936182
447835	cx47.1	7.98087513913158	6.10517516074101	0.00381399198148373
100006233	arhgap23a	483.653984208887	1.08626656535104	0.00381615690598381
405764	blnk	9272.8730862236	0.530710676536466	0.00381615690598381
100322372	si:ch73-222h13.1	36.8133710066467	-1.62528606584216	0.00382652007112247
100333685	cd302	898.010110993362	-0.865816353625871	0.00388140365521456
101886404	LOC101886404	1197.68485406512	1.16443182766461	0.00390151944958131
445244	ap1m3	165.697289825524	-1.81877291521602	0.00390789937805199
403051	pygb	7372.69113720865	0.921281714681872	0.00407049236664907
561776	zdhhc20a	1547.59717206109	0.679455955546732	0.00407846381051529
566671	orai1a	3089.73204858855	0.745546393586272	0.00411437271425798
556277	cblb	1258.54437538956	-0.760792068150203	0.00416782719541448
58107	per3	1053.9455262976	-0.951212303185503	0.00416782719541448
110439918	LOC110439918	32.3463777270607	-2.02635130130534	0.00422484420703802
572146	cdk14	519.596045338821	-0.637207838528473	0.00422484420703802
445198	suv39h1a	11.4340291900136	-3.99551986825965	0.0042728054562726
553196	tmed8	2813.59677900562	0.853860018899019	0.0042728054562726
569564	mical2b	456.464709163253	-1.27251723716085	0.00427840723917134
503893	itga6a	91.2116293651263	-1.7336877388057	0.00433206031761027
100006951	nrg2a	62.7113826713629	-1.87227511598164	0.0043382274176375
103909482	LOC103909482	23.0830121710379	-2.88342220723116	0.0043382274176375
140616	sox10	36.8663224506563	3.24885889663346	0.00436825841883719
566703	znf395b	1134.94611490724	-0.863699014128334	0.0043944360583928
570069	si:ch211-207d6.2	20.2589344572622	-2.83954046104255	0.004400661589355
794862	epn3a	93.8631236805225	-1.51246628404023	0.0044537459638985
415170	slc12a2	4560.12154458518	-0.749875949708913	0.0044914161668036
100006250	LOC100006250	393.365261151989	1.26766691655842	0.0044914161668036
799340	si:ch211-207j7.2	216.282559419522	-2.08690550874174	0.0045123837371538
768192	hlfa	621.415319877425	-0.840893469032003	0.00451311660227201
100332204	zmp:0000000884	89.3214348370665	-2.06575640731803	0.00451311660227201
100331987	LOC100331987	69.0157922758491	-2.32591223408696	0.00451311660227201
406339	hk2	1328.10795645527	0.742883290891196	0.00451411722652968
100331810	LOC100331810	208.85044938496	-0.9844049717335	0.0045948464088963
557072	card11	2225.6831967798	0.955995439712266	0.00459971852561038
100148750	LOC100148750	19.0101887824321	-2.37639398442374	0.00459971852561038
414329	rap2b	4667.834280003	1.00026790648193	0.00472075936636049
558684	b4galnt1a	1928.09956594715	0.874422448968298	0.00478415530628101
449994	pawr	203.109550948754	-1.11651451489299	0.00480439634901226
406493	myl9b	923.481243200961	-1.71007905202593	0.00481972746978806
565986	rnf145a	746.526611398737	-1.14177375095685	0.00490232137987517
570626	stab1	6639.53417581827	-0.761295267712712	0.00513512396196887
394213	sb:cb1081	427.765568677086	1.21434461348481	0.00516334729137379
567599	rasa4	684.498211873712	0.962938481149508	0.0052928813664804
368250	prickle2b	109.861851073192	-1.24704160835654	0.00531998974173392
558291	hapln2	20.1157266392443	2.96985027368665	0.00532143603893985
550481	rhoub	111.651506048367	-1.26349044022751	0.00545029409747839
103910120	LOC103910120	19.5646227218333	-2.91747157003751	0.00548105684713804
100150349	si:dkey-27h10.2	4228.46257169855	0.769278595593308	0.00562550166918558
566318	si:ch211-239f4.1	10.2708434682652	5.47828449837718	0.00565155891760645
571902	LOC571902	2066.38146591517	-0.965552741911991	0.00572640088505668
799194	LOC799194	471.699502552202	-1.6575256225191	0.00575692773166561
791193	si:ch211-285c6.2	29.2664603745736	-2.71932211245501	0.00580417828989238
101882295	ggt7	585.495654704925	-1.25407956008235	0.00598189520866666
566523	arhgap27l	415.037951796589	-0.873742560286463	0.0060231635060877
100141367	cers3b	146.575971538598	-1.45302397036554	0.0060231635060877
557360	rgs3b	17.5545819951756	3.46601825778427	0.00602499130340549
327320	f5	1735.15956733253	1.46773159219393	0.00605568067174436
566212	angptl5	305.157722711749	-1.22284031869504	0.00605568067174436
108179687	LOC108179687	43.7587742358921	-1.97647675506391	0.00609144004704363
101885277	si:ch211-11c3.9	167.589555107923	1.63309668722593	0.00610718293350449
561197	ptprga	62.1826242459665	-1.42754724664171	0.0061172042807702
556711	gpr18	4344.52763138524	0.780550449829832	0.00616796907586896
550268	zgc:110283	94.0227570467019	-2.69891293676682	0.00620382224266804
767730	rnf183	214.986108365026	-1.81021131656407	0.00620382224266804
431715	rbck1	4839.07853388048	0.544009340711316	0.00620382224266804
565921	fzd3a	134.184338978492	-1.62615795713568	0.00621311658115851
101885895	LOC101885895	17.0504042268727	-3.36304259793684	0.0063040519907922
101885860	LOC101885860	211.583188439159	1.24663974430956	0.00636350302809553
793909	LOC793909	4084.08234063226	1.17292779764685	0.00648316083023052
569437	cntn3a.1	33.497451955259	-2.09152120667276	0.00649882845047529
322455	cd9a	1643.01006110634	-0.753481716341284	0.00653141345510354
564098	pof1b	229.93547399383	-1.4748533930737	0.00653141345510354
368249	prickle1a	87.8414786991562	-1.67606146085448	0.00660468382959777
100004523	LOC100004523	32.1658499948361	-1.97589504351917	0.00664006641223689
101882936	reps2	156.979514227432	-1.69750396089221	0.006677564628241
405819	agmo	84.8541157329027	-1.44989201506128	0.00683723552633618
794494	ppp1r16a	42.0907631477056	-2.51483674896171	0.00684547720847131
442923	oxct1a	787.227374989356	-0.655194516872712	0.00685673930206537
559072	gba	6263.90852855302	0.484830773277108	0.00688171813175626
100331355	hecw2b	26.0232333462578	-2.8205400994893	0.00692064608953531
567389	igsf9ba	15.0929840892293	-2.67085302110232	0.00695599984597549
100002190	cyth3a	1038.95258665218	-1.04362423908914	0.00695987890935239
100537098	LOC100537098	19.3793884508022	-2.21773861148094	0.00695987890935239
101884972	mtcl1	113.213811311067	-1.75123308537928	0.00704758459120931
393212	eps8	144.209337300447	-1.46627098437963	0.00711286578043079
556499	atp7b	12.945955027658	3.87561004453007	0.00714363747044227
114466	tnfsf10l	706.750275288202	0.771263919265442	0.00714363747044227
567278	lect2l	29301.3691822119	0.915117589478801	0.00721590516126713
795588	slc16a9a	1759.13086184614	-1.34920635771355	0.00729522349502127
567117	slc7a9	70.9150457359326	-1.40867500926665	0.00730162724203943
794766	si:dkey-192k22.2	604.07668587713	0.850427982914409	0.00735640429526846
360145	mxc	34673.7515913575	0.970744494859648	0.00740511851840538
100150280	LOC100150280	35.2472204351518	-2.09287264296794	0.0074589211324088
100884132	ppp1r1b	60.3876926508459	-1.81080396632998	0.0074589211324088
103910418	LOC103910418	18.8477973280625	-2.33093461044078	0.00760752687156192
101886606	si:dkey-37f13.4	5860.07233364619	-0.668317568920919	0.00762032464537201
797199	slc8a1b	221.302055350445	-1.55460014499984	0.0076358738770908
84040	clic3	334.524932400264	-1.20516804090337	0.0076358738770908
556677	mfap2	70.3928360396172	-2.26553587971224	0.0076581313866076
793537	si:dkey-211g8.1	117.511384683936	1.23985995175922	0.00771535227868559
566542	sgip1a	47.131277884806	-1.84767737968397	0.00785525967333735
568794	col17a1b	608.681483317386	-3.58145238947401	0.00787917331500503
100534701	cfap99	6.28708198485693	5.76402261594251	0.00790324991889924
393504	rasd1	170.102415576386	-1.33393307184565	0.00793644484707859
393128	manba	6798.19939442645	0.596255391623866	0.008008195983487
566945	mmp14b	7830.01781557006	0.926248190348356	0.00802724073693015
553685	cyb5r4	1018.99525475425	0.54055295557956	0.00804096197766943
557239	antxr2a	5544.33810245556	0.977555644963695	0.00811046290020062
555317	si:ch211-276a23.5	5017.98324698139	1.01762745454049	0.00811046290020062
100003911	cxcl19	58142.0389180614	1.34116980433047	0.00835631219990488
140429	gnat2	811.781831245196	1.43484631334641	0.00837656889536769
335485	plpp2b	59.0491601778102	-1.72329805548126	0.00839599115891187
100884153	dicp3.3	22373.7666279062	0.595699160114263	0.00848442371799955
100148479	LOC100148479	2778.86888019511	0.775754902242626	0.00852279861939581
393858	fkbp8	1737.34272567242	0.513905205751694	0.00852279861939581
560793	kmt2ca	688.998813617515	-0.671096018731189	0.00852329845869795
360146	mxd	226.457033541066	-0.740574153828109	0.00856087227561179
450047	syngr1a	184.956989595107	1.74359272636196	0.00866017291282186
100001934	cldn17	145.83105481348	-1.31749948542028	0.00867343250850103
565190	si:ch211-253h3.1	5031.20045840667	-0.738819885775957	0.00872848292156616
100329702	ulk2	2818.26828450947	-0.956446049973769	0.00884113861681378
368415	ptenb	11797.7525601956	0.499102724603421	0.00893288520152405
556392	strip2	35.1447852870644	-1.67893963917826	0.00901701222500906
751761	fam168a	1208.35601356321	-0.530233654516206	0.00901701222500906
492467	gnal	1038.41114131878	-0.700878142034059	0.00901701222500906
378970	rgs12b	921.872440671493	-1.03161248387327	0.00911881122352129
360151	opn1mw2	325.004951094961	3.69958696012666	0.00932327837090714
100005208	stard13b	98.991707544735	-1.67785329852962	0.00944429850089327
568650	wu:fb95e10	63.8723545328004	1.26764039360783	0.00979457678545137
555239	mtmr10	940.787030881444	0.966529520061651	0.0098000740834774
571486	plekha7a	94.6020941378791	-2.1178808232164	0.00982049125272128
692325	flj11011l	267.468756767034	-0.977166124350458	0.00994827818676664
768196	me1	8592.14129669052	0.57470054457713	0.00996915891404735
572245	noxo1a	101.749880863259	-2.57377782605027	0.00998048609644636
565426	si:ch211-67f13.7	46.4487721421571	-1.48056015114631	0.00998780139178465
335530	wu:fj19g03	49.6041494682909	-3.24954819003603	0.0100056868072338
324587	fam234b	1365.35877997412	-0.961707784058132	0.0100083918069604
558720	marveld2a	182.763188631294	-1.12355498488822	0.0100083918069604
560481	hspa13	2116.50379093119	0.594107933290761	0.0100083918069604
110439214	LOC110439214	70.3297611413225	1.77973577736645	0.0101230401309784
494153	cyp2v1	498.179082802518	-0.792245974749129	0.0101431994904551
768159	si:ch211-195b13.1	2381.73582671052	-0.9751280644371	0.010185653953222
406635	sgsm3	387.25723900869	1.09687465478902	0.010309210855004
101883847	zmp:0000001289	1245.17167309469	0.726333170406485	0.0103674382400105
100333000	LOC100333000	10.2901767026463	3.57177560143468	0.0104682968905566
553238	esyt3	247.885911962993	-1.63790816649653	0.0106487928197774
790934	mapkapk3	2636.98231396583	0.455269889956087	0.0108170878217715
58085	prph2a	274.472484793119	1.0780140672208	0.0108278293824406
447881	gbgt1l3	298.899603476095	-1.40277691007095	0.0108747633767649
393285	irs2a	984.966259678229	-1.06210032805387	0.0109300354780902
100333059	si:ch211-39i22.1	966.440221182729	-0.94075734308165	0.0109709250542239
566242	slc41a2b	5297.7803377222	-0.816659785423212	0.0110690820484858
794066	si:dkey-195m11.11	6639.81758052067	1.10997232609454	0.0110690820484858
336121	calm2a	2377.08177558027	-0.951869473863367	0.0111125648547056
101886418	si:ch211-139k8.2	135.145164821957	-1.06643350991878	0.011126694609707
558181	ctdspl2a	833.464667026463	-1.06232371951689	0.0111748162959081
114436	dusp5	3628.37084032748	-0.776611997315396	0.0111766585643222
100332544	fermt1	33.3793134226742	-2.41292284067654	0.0112037148415
553701	gda	829.873263011037	1.51699928219475	0.011228603758991
100150834	LOC100150834	76.2135432074449	1.77670426675699	0.0113747106579012
474349	magi1b	207.282056770792	-1.35775238621231	0.0114511721259184
373136	evpla	230.447841871861	-1.75283124205624	0.0115327188982792
110437876	LOC110437876	26.457479618052	-2.858281047223	0.0115327188982792
561285	plxna2	152.641210582782	-1.02538913164346	0.0115327188982792
108180211	LOC108180211	134.370681347002	1.21041466130941	0.0116322252505482
558182	igf2bp1	5582.46831767809	-0.648860864326027	0.0117666886697216
563498	enpp5	198.456736010931	-0.778516496558001	0.0117666886697216
563606	sigirr	438.621176200636	-1.25292984972129	0.0118497619405413
140633	per2	5480.22284052154	-1.2648847676045	0.0119415559935804
550523	stoml3b	13445.5476026879	0.556922864881369	0.0119415559935804
791696	asic1a	85.8857258936177	-1.72284468038314	0.0120990519026471
569507	smyd3	165.936627503215	-0.86943283765038	0.0121793876101574
544654	phox2bb	16.3305191304344	3.60927189909065	0.0122492043194646
110437865	LOC110437865	54.8906855179586	1.71625786815413	0.0125355206935547
796270	map7d1b	3892.60588088478	0.466001462798706	0.0126201269733641
564464	lnx2b	182.346667573953	-1.57243749165993	0.0126358822373187
100142647	mogat3a	199.863304975762	-0.934398423191102	0.012658312497484
101448000	pappaa	698.821620189296	-1.68031045763208	0.0126683366946062
337166	si:dkey-40g16.6	4201.32552062519	1.50547055971108	0.0127537175617936
445177	dnajb1a	730.135383085054	0.639089439341759	0.0127969798875797
100001258	si:dkey-96n2.3	274.190426093166	1.04179651593959	0.0128455180877155
101883587	sgk494a	148.844656273593	1.06209653954236	0.0129273110416672
797711	LOC797711	588.883503846647	-1.16132594553581	0.0129800922447024
108183587	LOC108183587	104.996284453674	-1.11238643938764	0.0129800922447024
794081	ucp3	842.639918272482	-2.66500990658153	0.0129800922447024
101885785	LOC101885785	35.9124711212168	-2.02062921036654	0.0129871862535541
445156	tm9sf1	1444.32415556876	0.600428164572545	0.0129871862535541
767638	ftr86	92.7403950250871	-1.81938983958458	0.0130188116187206
406290	itpk1a	258.943715912481	-1.97260266976714	0.0130270415957338
557046	slc26a2	732.161872588466	-0.895925331752388	0.0130611592592053
368923	slc6a13	2129.2150490849	0.533475394862583	0.0131185531754531
570370	si:ch211-140m22.7	396.477561876067	-1.08614036285428	0.0132089403526618
100536356	si:dkey-15j16.6	3518.72421128689	1.10892594513307	0.01324739548742
101883199	si:dkey-196h17.9	13.3693026308035	-2.73753878714895	0.0133237186868593
561062	si:dkey-157l19.2	306.45092394904	1.07721819588173	0.013480689913584
799376	si:dkey-71p21.13	12.4048166216808	-3.3726225193231	0.0135711065634123
450067	ormdl3	13.4918253249802	-3.07430625765463	0.0135842830014955
110438075	LOC110438075	3493.62510635074	0.65538638137663	0.0137385645949745
101882312	LOC101882312	17.2856319648188	-3.0413824341975	0.0137396988999365
570839	c1qtnf6b	96.9389943603076	1.9000386053609	0.013918811639432
562442	col8a1b	13.8495467768024	3.27125766571243	0.013920471061083
114405	cx27.5	17.8260644023435	2.7882434167707	0.013939328645555
553244	tom1	666.357760635929	-0.59093988176247	0.0140354760531436
100136865	abcb4	9874.51857219365	1.22570748983015	0.0140424185266731
445025	slc10a7	5542.09342815122	-0.785834509150259	0.0140433236978527
101882843	LOC101882843	3024.29463715229	0.743166777712183	0.0140736220841329
568158	slc44a5a	17.2084699728123	-3.06153219380601	0.0141488693119633
559958	cdaa	1593.65219126699	1.05411916754657	0.0142836172300255
323439	slc1a3a	3330.83946321957	-0.848618474353393	0.0143355077419175
100006320	ugt2a1	421.513796520384	0.962205852343147	0.0143355077419175
436748	nkx6.1	6.78880334078577	5.87432917716318	0.0143355077419175
553366	ccr9a	38988.1863881208	0.643320397891351	0.014459357401719
101884661	si:ch211-285c6.6	35.4660872356194	-2.33948117323518	0.014459357401719
557886	hlfb	40.3691979328776	-1.87736629025489	0.014459357401719
100137124	dgkh	261.430685638318	-0.669929644458058	0.0145711164346533
767735	tmem229b	485.786513536669	0.939929248192984	0.0145803213338655
101882642	LOC101882642	200.730545822836	-1.09184971027968	0.0146785112240961
558810	ppp2r2bb	85.9531716142304	1.09494427212288	0.0147758593654797
101882012	LOC101882012	2712.06594162319	0.653197094106434	0.0147851785312254
570401	kcnn1b	638.123648272144	0.80981880327418	0.014909954236154
393249	zgc:56525	5203.20139860115	0.455288782566614	0.0149149859502868
393609	myo1eb	38.4379308123023	-1.71588042246422	0.0151113066362386
386994	rab11al	141.332414160152	-1.74230418607963	0.0151152428126417
100536675	tyk2	1312.17241201136	0.558204779314414	0.0151431521036611
100148645	cacna2d3	24.6250574430028	3.06729663713484	0.0154620671717134
570238	fosaa	90.6621306208306	-1.83736268121569	0.015477098893982
100170801	rgs19	1822.28643719177	-0.875579472720524	0.0154824240411393
556314	ttyh3a	5631.80409148235	-0.530610788437288	0.0156381279765523
777621	zgc:153952	146.558546754878	1.24339209652755	0.0158178911936406
567804	fbxo41	50.0209393033935	1.76118081759112	0.0158781087531315
393953	prkcbb	3784.59834106702	-0.689923495402201	0.0160252154253284
100535838	LOC100535838	373.574787437014	0.984216801148967	0.0160961825133772
406342	tcirg1b	58439.6666822305	0.507586775393193	0.0161018653681619
571431	LOC571431	55.2415148572794	1.95810783135025	0.0161018653681619
100334729	rab11fip2	677.806083650794	0.855345283081521	0.0161305961052883
368305	nptna	1079.79160991298	1.06119568081849	0.0161305961052883
101883708	LOC101883708	20790.5662955458	0.748787410791958	0.0163447696842069
402837	hamp	6835.65382639194	1.2914784404519	0.0163927345863915
767713	tsen2	239.721101234016	0.795373793412589	0.0163977288097921
447830	abhd3	155.92236928344	0.865939237214913	0.0165987777612995
565700	sat1a.1	299.792755244649	-1.16153942370387	0.0166332470255838
504088	enpep	15.6039114864822	2.97641525542713	0.0166565243230782
100330483	cpeb2	169.102930681526	-1.53427770015799	0.01669487880391
791140	cd276	1017.78105451669	0.690978995177538	0.0168067423249114
100332626	LOC100332626	200.264927389516	0.910761087321515	0.0168067423249114
100321084	si:ch73-52p7.1	2361.47830302184	0.813714638264907	0.0168266320698662
317732	scfd1	4614.44891837752	-0.440791140010251	0.0168412169268837
563674	il4r.2	5342.63283212806	0.649045973420877	0.0170100525347891
777735	fgf12a	48.872416535244	-1.98736478664411	0.0171066725824212
570598	cspp1b	730.4867922187	0.513450665380988	0.0171066725824212
554826	crip2	45.4279796944078	1.82697932813067	0.0172294512411445
327162	tmem51b	65.104091549633	-1.34767074834961	0.0173140477554378
100004528	LOC100004528	309.653459725567	-1.51362082404625	0.0174287257008221
799520	LOC799520	54.8295203293243	-1.9748306438902	0.0174287257008221
259255	plagl2	678.24604065184	-0.562823540011903	0.0174315231556315
563797	si:dkey-26c10.5	2998.05129129693	0.974783188438358	0.0176584407685047
767657	abhd12	2969.38757404416	-0.54796249597678	0.0177629421698202
402799	degs2	182.272009253325	-1.22891514068675	0.0179219534200604
100148489	si:ch211-15j1.5	56.5340090262945	-1.55775539370481	0.0180197007007201
606579	inpp5e	306.090211379655	0.772336265146636	0.0180937973891965
557435	raph1a	117.051460507923	-0.987456464643201	0.0180937973891965
108179235	si:dkey-42l23.5	473.160509965375	1.45311793857247	0.0180937973891965
30255	tfa	1618.23355279932	2.8720265691214	0.0181690055242243
393673	desi1a	783.392368660104	-0.695632664194802	0.0181958052994229
555479	triobpa	2111.35954503452	0.558548048939827	0.0182638040251155
503885	fut9d	36.8099708837766	3.75486445245429	0.0182638040251155
559138	cmtm7	1502.07950705388	0.556449898444924	0.0184716459433615
101885611	LOC101885611	1539.797076559	0.725401140963715	0.0184890547500369
101886727	usf2l	316.616687022389	0.843861289285587	0.0184890547500369
100038777	zgc:163022	3824.50285443551	-2.75105569728197	0.0184890547500369
335396	srsf5a	14001.8833699749	-0.458024445695373	0.0184965563018844
101886968	cst14b.2	193.678145075559	1.11490835360014	0.0187718426956292
565650	zgc:174917	30.6625717376206	1.67550315176732	0.0188544339759045
100170821	rap1gap2b	9.72139744491349	3.88154614390558	0.0190434419298861
794675	si:ch73-306e8.2	9.51310432537236	-4.04515796027116	0.0190532189713371
100534731	LOC100534731	190.913858554433	-1.00927276805508	0.0190731914694742
100038799	mink1	114.450923031459	-1.30392976542626	0.0190775622558009
556003	sema4f	192.29590290437	-0.982842773054081	0.0190775622558009
561067	mxf	54146.033603251	0.873306625941016	0.0190775622558009
555972	rcc1l	387.073520008198	-0.612046210768342	0.0193390015331697
394150	oxsr1b	183.434954547065	-1.19763666479978	0.0194003833666832
564061	si:ch73-86n18.1	229.579953780933	-1.25842414150188	0.0194454347560238
103911153	LOC103911153	6.14836865911234	-3.90834753114864	0.0195193320774958
81592	cldn11b	462.80583367738	-0.625597003524761	0.0195821355119981
796120	si:dkey-238d18.4	308.112103038911	1.47343282972807	0.0196731446224545
100332635	si:ch73-334d15.1	691.68853618948	0.655612406818243	0.0199785856888358
564531	si:ch211-132b12.7	2790.64234769594	-1.3740672384417	0.0201582226733889
559260	si:ch211-133n4.4	275.275804948851	1.06291650084876	0.0202663750302486
793842	si:dkeyp-72g9.4	428.836469605567	-1.14459742862263	0.02050976907642
557131	si:ch211-285c6.3	75.4945085340171	-2.19184820675357	0.0205385567039737
552960	cybrd1	735.500492732204	1.17476022902526	0.0205385567039737
569963	snphb	89.9002736146712	-1.07798665509483	0.0206081783470587
100526672	ptprsb	159.388570773194	-1.21753518554049	0.0206734837625231
445319	ncaldb	842.362109184566	1.00855568262386	0.0207161167102336
566675	suox	742.476926340157	0.714716160133041	0.0207748256918343
100034656	si:dkey-211g8.5	53.4913885683647	2.76104205327679	0.0208563663032332
406404	ak3	1063.1249820028	-0.765199991465505	0.0208936580936661
553661	homer2	121.393316548786	-1.37791593842942	0.0208936580936661
557679	mapre2	744.812984860923	0.959569199162761	0.0209495515333222
327364	wu:fi04e12	469.346797440011	-1.18167792396578	0.0209559986078721
323922	dnaja1	1700.90494975345	0.636410137849576	0.0210238057593627
566175	zmp:0000001200	84.8237178413634	-1.52172409245228	0.0212458008640639
100007048	bcl2b	44.8656302984143	-1.66961503227882	0.02153040699384
100007813	LOC100007813	198.902483510489	-1.32863083778234	0.02153040699384
100884152	dicp2.2	474.4089570165	2.42088893075971	0.0215569575852965
30275	inhbb	425.402869348562	-0.695486740958959	0.0217784457576722
110439800	LOC110439800	22.2428353330115	-1.9546647482253	0.0220635501397358
100333821	tnfrsf11a	2374.99531003347	0.682253414889599	0.0221667028775217
569444	arid3c	2155.68598922041	-0.547578278797308	0.0222332010912281
393852	cep89	1257.83576050793	-0.497686779350186	0.0223797595156591
406446	kdm2ba	2302.90594970845	0.643114823893618	0.0226018960847591
368631	pms1	414.961181508538	-0.693019835094049	0.0226018960847591
570390	apoc4	8.32736892609914	-3.03721585557993	0.0226018960847591
407651	prlra	153.366091307796	-1.92278325441978	0.0226018960847591
101885241	LOC101885241	382.183910432119	-0.543965485376605	0.0226018960847591
100537060	si:dkey-117a8.1	1187.30995622715	1.2294065292776	0.0226117942247725
447866	arrdc3b	10420.2520122322	-0.824560304700905	0.0227368061697717
100003436	si:dkey-6n21.12	545.966671272759	0.721727887981601	0.0227904984661138
100002256	pik3ap1	600.613448992057	0.61412162775618	0.0227904984661138
100536120	havcr2	7470.44653375147	-0.743991661531152	0.0227904984661138
562630	LOC562630	3786.3311846348	0.595520904277023	0.0227904984661138
100007788	rab38b	1443.53504889888	0.782976509696507	0.0229626396217371
394245	slc2a15a	276.170280265296	0.952463265824418	0.0230829019535751
797776	si:ch211-133n4.6	8.01737943358912	6.10982581346706	0.0232119296999538
796419	mhc1ula	52.2348819226581	-1.92996342738513	0.0232119296999538
573216	tuba1a	234.017798304394	0.91380351980442	0.0232916198642064
796739	mast1a	23.76287925675	-1.84588612944332	0.0235245515665452
100537502	LOC100537502	95.2956275443936	-2.21729696617041	0.0235245515665452
571290	sema4ab	20855.0699846273	0.624537774019002	0.0237354457969065
393509	mboat7	3137.27206562381	0.497849193957042	0.0237412879069851
569561	arhgef25b	45.0892454962357	1.57372252153967	0.0238730227812543
556743	sema6e	124.638199048363	-2.08031048458763	0.0241493567481236
393613	kdelr3	55.929301923384	-1.56513487910206	0.0242353780264251
323738	ankhb	5083.87880786346	-2.34650847317997	0.0243353236201922
407987	arhgef18a	777.475389972833	-1.31194715543451	0.0243410478208492
553350	cgnl1	336.184511471535	-1.26508995119359	0.0244465565889402
335916	jun	90868.226175793	-0.54415173251993	0.0244465565889402
559490	tppp2	12.6294696841434	2.75320179371642	0.024629560381496
558825	lgr4	257.174189664919	-0.986451162594652	0.024629560381496
563771	bhlhe41	203.951344629646	-1.03929937273335	0.024629560381496
101884620	LOC101884620	93.4600290973499	1.13816667775435	0.0249826306903361
100334565	si:dkey-288i20.2	19.3471156708934	2.0776752593794	0.0250415447746741
767684	itln1	31.028182218457	2.53578902327911	0.0251973768517627
108183933	LOC108183933	103.816832580551	1.06708272627421	0.0256662441860389
378838	sh3gl1b	441.618039268176	-0.537081628444776	0.0256662441860389
140427	hsf2	2513.85321604195	-0.999905847492816	0.0256662441860389
562595	flvcr1	620.679483723867	-1.1397555218528	0.0259274308300787
562048	hivep2a	451.22346434172	-0.826804111020506	0.0262806898592414
795086	si:dkey-33c9.6	1885.90761458085	0.737439720368922	0.0264323388204273
560024	slc47a2	411.769009763198	1.0214901418302	0.0264323388204273
333987	fxyd6	42.245534451901	-1.81283204134212	0.026820468120141
101886660	LOC101886660	229.864687329711	1.71255105127731	0.0268614366057433
110439555	LOC110439555	15.2694370425958	-3.11856014409654	0.0269406151434098
767739	neurl1ab	35.7478641991011	-1.61489583768563	0.0269406151434098
556087	wnt2bb	28.1490851022838	-1.66779658822129	0.0270450876987755
406296	atp6ap2	46868.1876367117	0.411302376126719	0.0270450876987755
798256	si:dkey-262g12.10	45.9226144877818	-1.19250813725415	0.0270774070102988
562138	hip1rb	114.917960254847	-1.89294097609916	0.0271571213996224
557389	soul2	147.209776109848	-1.23478438201005	0.0273173847777046
570991	si:ch1073-340i21.3	70.9091729780998	-1.43641616418952	0.0273427529531478
569216	lrp11	31.9885967846741	-1.91580848544211	0.0273829085427871
368213	glo1	14583.9359901205	0.624335859923446	0.0274716661969057
108191951	LOC108191951	1295.82836724125	0.608497877283005	0.0274716661969057
393608	ptger2a	1088.51569125347	0.685154433231361	0.0274716661969057
797259	si:ch73-92i20.1	3332.53736132255	-0.615046096447766	0.0275525546080372
564090	zgc:193593	109.70786694245	1.44534650237002	0.0275525546080372
84702	cp	21.6924513578852	2.18833974171687	0.0275525546080372
393795	gpr143	105.651323278411	1.79388249850748	0.0275989787627756
386801	agps	560.370429724676	0.531080804339883	0.0276906086234013
368424	snx9a	432.105856631001	-1.04124232419382	0.0276906086234013
100073343	rapgef5b	52.1964770395539	-1.82633442372056	0.0278270834451348
100536671	LOC100536671	84.6142660658836	1.59573108062758	0.0281356742525436
606664	dnaaf2	102.413876330722	1.0779588722188	0.0281576594365034
100007087	si:dkey-23i12.7	1028.96261299609	0.912901586584365	0.0285468708971536
30558	pax9	502.968220362061	-1.08885687119638	0.0285520191731148
565848	zgc:171470	156.602547255145	1.39939413256176	0.0286772405173949
570918	si:ch211-150i13.1	67.7282794183273	-1.87618950504309	0.028752082147427
406204	per1b	5009.20265057027	-0.608912616797646	0.0288684703936932
406755	rp2	16177.7708292072	0.502679711121032	0.0290192462874265
792628	si:dkey-18a10.3	25.0983239434984	-1.89384028214497	0.0291514912249345
559087	pla2g4ab	81.9623175103205	-1.08101778855981	0.0291717914827614
103910140	LOC103910140	2986.73349685952	1.20272681924708	0.0293955682196171
100334940	traf3ip2l	88.9201010538966	-1.38926154484783	0.0293955682196171
100034575	vwa7	1335.49491820171	0.672313233622699	0.0293955682196171
100141332	slc6a18	8.20680924386775	6.1454375727902	0.0293955682196171
798385	qrfp	8.18244716102335	-3.17938758077376	0.0294622533265425
100000577	ppp1r14bb	2105.03788878152	-0.676464203749326	0.0295768820592325
100006649	LOC100006649	1461.29371529586	0.998933279832441	0.0296021817009291
559001	fasn	233.13291572583	-1.3477299677884	0.0297475827882133
557021	nub1	1461.07428230445	0.432276378384488	0.0297903728174682
566735	insb	23.720042936355	-2.0320408908685	0.0298139385705042
101882405	sowahab	38.0984837033689	-2.28247169473175	0.0298438955382695
402880	cox4i1l	33.292485546357	1.56210572645179	0.0299445511941745
378845	tjp1a	209.271785408031	-1.48976285508915	0.0301009043125523
386643	pik3ip1	361.16903141871	-0.749991930293743	0.0302787286235063
100334259	cntrl	662.910104722696	0.643084689246345	0.0303396957612305
378452	cdh17	284.207968318338	1.72494118079666	0.0305815489917344
100003349	si:cabz01036022.1	807.828712185034	0.763060423693641	0.0308127822248051
550539	slc18b1	123.31424766808	-1.06761250353316	0.0311011074052895
100073331	birc7	562.52692579941	0.60250285106893	0.0311950145437398
503960	fam189a2	402.395078982123	0.687406054915405	0.0315243934657652
558522	tshz3a	151.961912835484	-1.02209692897266	0.0315243934657652
569366	tnfaip2b	3947.27379022946	0.495403128964698	0.0315625803181418
445158	slc16a9b	2138.36612062805	-1.11897121076986	0.0318149721142405
553801	fam219ab	359.160258285794	-1.12599225464029	0.0318320580512111
572007	cdca7b	293.465464663497	-0.978530380954799	0.0318320580512111
541527	ocstamp	312.339642503761	1.14088575113925	0.0318719923777123
494176	rdh12l	2324.18392953001	0.594541108457146	0.0318719923777123
245698	flot2a	13411.3280577886	0.597578810604674	0.0320469313958479
571092	LOC571092	37.4531518728019	-1.95158571353616	0.0322202206418036
563087	si:ch211-129c21.1	81.7182897766926	-1.64874465741215	0.0322202206418036
337865	nkx3.2	42.1352062178586	-1.95559226825594	0.032576402889074
406841	tmem184a	1234.8788688245	-0.754346888268648	0.0327688173954095
558524	mgat1b	3198.24332480871	-0.642040439082569	0.0327688173954095
368435	p2ry4	428.262716071544	-0.808068443413044	0.0327986292308815
407634	ptpn4b	423.178438703073	-1.0121223840544	0.0329027795950212
79375	foxc1b	119.565208068289	-1.29642407954842	0.0331643842121602
100149497	rapgefl1	247.235876508499	0.74439222958193	0.0332499454078213
799678	trim35-10	83.3285134906648	1.24162430389058	0.0332662384356568
550588	zgc:110626	290.175289809006	-0.910169549680647	0.033315260862361
100034581	ctnnal1	267.221609893497	-1.15220387009158	0.033315260862361
369190	kif1b	747.725482340919	-0.67343459092092	0.033315260862361
368752	vat1	2207.76948875178	-0.691195007440387	0.0333453664031268
100149352	LOC100149352	49.7110833016977	-1.62330136264384	0.0336261379645318
794425	LOC794425	864.194877490147	-2.33002252089129	0.0336808481068652
100142651	zgc:174275	179.944890238461	-0.867662884950856	0.0338542604037197
767688	zgc:154040	1499.15188427329	0.737836499261746	0.0338592898567476
100333296	si:ch1073-303k11.2	731.349999442624	0.788884079836284	0.0344067137302958
108181204	ephb3	30.9147036497095	-1.51653032673766	0.0344067137302958
100134976	il21r.1	4196.78507378503	0.565920597323103	0.0346488728857299
492777	cfhl2	74.0493781435627	1.08585483982919	0.0346488728857299
436635	ppfibp2b	5925.43715693767	0.482276508206537	0.0347989616056059
100332108	LOC100332108	1319.06370964433	0.620475698530112	0.0348433211156723
407735	gria4a	9.26994158437984	-2.80534177247861	0.0348433211156723
100322074	si:ch211-171h4.5	460.498321795943	0.812202251721786	0.0348433211156723
562262	tnfsf10l3	8.35497780515396	-4.35976485113621	0.0348433211156723
566685	arrdc3a	3550.86531942936	-0.940608521136749	0.0348738355121512
100136840	serpine1	2753.66168261408	0.665862251671508	0.0350236689588512
336211	zwi	96.4255800460212	1.53595262595334	0.0350366470895746
554232	ephb2b	109.78526794791	-1.48527462027407	0.0350366470895746
337436	dennd6b	149.66710621895	-0.954004336915758	0.0350601551259132
797436	LOC797436	174.921781093121	1.45632064240362	0.0352986222384876
101883776	LOC101883776	10701.2825416655	-0.429999416367878	0.0353039332100624
110438218	LOC110438218	63.5739244077376	-1.11807087005722	0.0354023955078354
100192213	zgc:194282	99.0976048038289	-1.73187015845154	0.0354023955078354
494479	perp	4611.44331454736	-0.661689162708287	0.0355017297590214
794649	f2rl1.1	90.7596181268674	-0.946821383374156	0.0355017297590214
407664	hbegfb	4004.4366863284	0.810409192156255	0.0355556284243103
606660	aqp9a	19.9949579497331	-1.82431763716465	0.0356151065991413
393711	abi1a	1167.65360903366	-0.569335235419588	0.0358606449565166
368436	celsr1a	27.242225117124	-2.32106978161044	0.036146781741791
359833	tfpia	104.606085909312	1.56033875034325	0.036146781741791
100005189	mybl2a	919.369814236957	-0.448446112761137	0.0361729941966274
393697	guk1b	43.825787775041	1.44060655781842	0.0363960313334467
568159	ago3b	479.48202114032	0.710059778763105	0.0365339230868503
406299	sucla2	26877.6266573146	0.558676360854799	0.0366037001969091
554091	dnajb9b	1131.50861536433	0.665992951093261	0.0366940479370708
64273	atp1b1b	14628.5571786908	-1.01137473321049	0.0369565341182243
561024	slc6a13l	74.5421712730259	-1.34592695983159	0.0369565341182243
751626	dhrs7	494.903547838138	-0.633103906072181	0.0369565341182243
100001648	tmem199	1742.11697046738	0.543961232648527	0.0369565341182243
100148828	b4galt2	70.2506115797421	-1.3081598198201	0.0370553595434114
100151026	arhgef40	9.59019844547949	3.44499249512347	0.0370553595434114
793139	evplb	244.776412666209	-1.46062725957082	0.0376126908486676
570782	mfsd11	1219.16204768927	0.677726391577577	0.0376459363077753
100334992	unm_sa911	16091.2708402441	0.523319554072726	0.0376459363077753
100002503	LOC100002503	22.4915323837863	-2.51179732970843	0.0377957256817036
100006456	fmnl2a	64.6313340591851	1.0589101371015	0.0382216787358812
553776	calcoco2	3227.70686961778	0.41412294776516	0.0383282754878728
445059	adprh	124.601376261623	-1.0872633089154	0.038384416767476
100150707	LOC100150707	24.2194681193518	2.28048307964342	0.038384416767476
101885373	LOC101885373	10.1807521686848	-3.46049145651773	0.0384668590229913
561639	dnah7	20.4089054903409	2.24115573241315	0.0385425867853099
794176	igfbp2a	19.3032417392188	-1.76438239677119	0.0385776444787995
445192	mfsd6l	204.318308755398	-0.962028624902452	0.0386843059571618
436834	clic2	1547.08127470764	1.00258865668586	0.0386843059571618
558353	LOC558353	10.1585621781086	3.93987851270184	0.0386843059571618
751784	htr2b	20.7809970810457	-2.15111609887681	0.0392783709174994
571696	zgc:113921	332.692168513449	-0.742591912352049	0.0394604098646011
799432	esama	77.4950421653817	-1.6843613424593	0.0394604098646011
30677	tpst1	1111.58645981761	0.82850331615551	0.0395030885858132
565869	klf9	1260.63607742668	-0.996951797989088	0.039795100097391
100537120	ppef2a	2344.69964503815	-0.477961076623839	0.0398989022676171
556387	foxred1	206.28639982096	0.798162745366066	0.0398989022676171
30121	flt4	11.1892871255039	3.41858802121045	0.0398989022676171
100004299	LOC100004299	127.292977132842	-1.71689902141272	0.0403836681042036
117603	klf3	304.060395954857	-0.610946500502455	0.0404238039236145
550606	atpaf1	1705.86888852211	0.434182001451427	0.0406922653288896
353224	nrarpa	724.795055510146	-0.567184298005179	0.0408062686904562
560000	cpt1ab	709.351701690762	0.833740248272727	0.0409133351113256
560066	si:dkey-4c23.3	19.0397572173646	-1.74210800706491	0.0409558162001689
556254	si:ch73-1a9.3	5702.54774360928	-0.884154473522273	0.0413141777280239
100334453	kcnc1b	12.4582868122444	-2.38763736618908	0.0417639351352831
777613	si:ch211-137a8.2	139.079880308297	-0.968825158878926	0.0417930862654445
335994	il12bb	620.97301475682	0.874457561760008	0.0418613228402325
406797	snx5	18008.947686999	0.401075329536267	0.0420981795768987
100004091	si:ch73-144d13.5	173.585906769409	-0.712381332771271	0.0420981795768987
100005584	LOC100005584	34.7353863665693	2.57227328166377	0.0420981795768987
100101640	apoa1b	210.282196708137	1.27005749697703	0.0421313877629349
368847	triob	69.6807860998869	-1.26175091331494	0.0422936280066243
368461	lpar1	142.271854973353	-1.40229037185255	0.0423248279781662
492328	ankrd9	246.548350142123	-1.2029789063858	0.0424940924968216
447854	zgc:92140	217.888400813506	-0.829004548584227	0.0430838123711897
101885028	akap7	429.425292888603	-1.09372367169768	0.0432295785846179
796377	sema4e	468.232389708884	1.0388934416426	0.043327880922018
445184	lpar2a	429.159350149622	-0.626400584855112	0.043327880922018
555362	tns1b	253.406738225989	-1.54718418270882	0.043327880922018
541323	mapk7	773.473661858166	-0.487949473733368	0.043327880922018
735292	limk1a	2762.55157314508	0.772277001165141	0.043327880922018
101882554	rbm10	133.37751802238	-0.925972952600286	0.043327880922018
336830	mpzl2b	3813.16951009793	0.668690676059346	0.0434018429479955
100148891	si:ch211-269m15.3	634.720582081259	0.528044733085377	0.0436706754361166
436734	txn	1809.61555611741	0.870591606123368	0.0436758603739036
100331397	si:ch73-106k19.4	30.0893542459421	2.52149947286096	0.0438047681579386
327512	psat1	910.695798711937	0.860704001020527	0.0440754305507218
559502	mrc1b	20210.2155923675	-0.580648683081845	0.0440843138466599
557682	dcun1d3	2263.29473416533	0.582296564959317	0.0442003092217972
571427	ftr15	56.6987898365784	-1.78025974305715	0.0442839575940433
335716	nme2a	62.2015838095632	1.52587028265778	0.0443309236993734
436823	pir	621.459848846601	-0.683187183199511	0.0446422460410117
100535864	cipca	285.852343682598	-0.77797157124307	0.0446711348871577
566871	si:dkey-32e23.4	438.846181193251	0.649874430022628	0.0447831320807213
559686	si:ch211-207e14.4	33.2114028564318	-1.54287392539569	0.0449304256766015
30080	mitfa	249.076043218718	0.996009823741446	0.0449737946888862
406802	tspan7	281.467832112985	-0.771905037287014	0.0452159296821611
796767	hspb11	6.24479139654732	-6.43216542738373	0.0452159296821611
100006580	si:ch211-255f4.12	401.389591258259	-0.586149581089006	0.0452159296821611
568734	trim16	103.385085726258	-1.40242737912286	0.0457793831505383
571720	si:ch211-251b21.1	1343.25091854701	0.944203014469982	0.0458321127526247
100331902	mocos	127.979456213542	1.20013777783015	0.0458321127526247
103909724	LOC103909724	29.612675360787	2.14157041442368	0.0460272124422609
795793	tmem238b	38.4053282805947	-1.33929613083248	0.0463369413184918
100124612	ms4a17a.4	108.509440231472	-0.974999396011187	0.0463599053069274
100033386	irge4	2143.10938346518	0.608870445466027	0.0463722243117062
563644	kdm6bb	1341.07433225165	-0.53649455109673	0.0466188950755674
30166	mpp7a	152.599687717907	-0.880006791728681	0.0466188950755674
494109	ch25h	8607.08366334557	-0.780662090054215	0.0470909654912741
100002400	si: ch211-223l2.4	8032.31099989684	0.718488498001912	0.0471343802471831
103910163	LOC103910163	1058.12046609275	1.10281411037617	0.0471776628473403
724017	crb3a	68.6256759532739	-1.72445712542689	0.0475188451987224
436707	havcr1	69769.0272090344	-0.684800448610545	0.0477179175570958
791205	crym	169.697775547527	-0.847273499505215	0.0477922112382758
554141	c9	9.90879273902383	4.51641446146594	0.0481538964240324
101883152	si:ch211-121j5.4	43.6721331927007	-1.30181134274201	0.0481538964240324
557043	mb21d1	1323.81927419677	0.646464755194067	0.0481538964240324
373105	rab13	472.42220552151	-0.646702852431066	0.0481538964240324
100535067	LOC100535067	51.5645506020977	-2.17863884606915	0.0481538964240324
436586	ccm2	471.948012466248	0.838060219002184	0.0481538964240324
493588	pcdh2ab2	71.7621790080977	1.6707657111187	0.0481948349071062
100330019	aff2	123.325202398388	-1.50079223253137	0.0481948349071062
100005952	hepacama	47.0614518011401	1.23938072646436	0.0481948349071062
100537110	si:dkey-42l23.7	879.589412884945	1.03848915207237	0.0481948349071062
562840	rdh10a	43.9729358357064	1.54410087256417	0.0481948349071062
561960	si:dkey-229e3.2	1399.12966124289	-0.990380795240237	0.0483027063605392
105665605	pigrl4.2	981.908310757391	0.605695145733215	0.0486294889565088
100535415	LOC100535415	79.6590884165639	1.1597276672982	0.0486294889565088
103909884	LOC103909884	12.2212247789132	2.34053017857743	0.0488130039900241
560883	ptpn13	404.423240496141	-1.00098939094249	0.0489409166747798
100334953	nck1b	10293.2293165056	0.48155695066647	0.0489409166747798
100330575	LOC100330575	67.5776333242234	1.13941278989429	0.0489409166747798
327220	fxr1	1344.11550991416	0.468390126492291	0.0490588761593786
100329171	bmp16	8.20651184068727	3.62310561902082	0.049194364646558
325735	zmynd19	631.641966541415	0.599685181744314	0.0495722682173562
573360	xpnpep3	1167.08063993425	0.465109656365222	0.0496483865194256
100003849	si:ch211-157p22.10	3369.80600017887	0.631163977520355	0.0496483865194256
100537783	si:dkey-77g12.1	64.5059010590441	1.06105254823633	0.0496483865194256
100148751	LOC100148751	30.9060773939348	-2.63916462853826	0.0496483865194256
563632	wasf3b	116.066699947958	1.07232811132989	0.0496483865194256
103908668	LOC103908668	161.360543897408	-1.1813390724489	0.0496915964318388
108180269	LOC108180269	207.736895772761	-0.634064570658137	0.0497020374559646
101883382	LOC101883382	882.487076762351	0.676401274455684	0.0499209257581603

## Sheet: DEGs from Venn diagram
Lists of either unique and intersecting up-regulated (Up) or down-regulated (Down) genes upon Salmonellainfection at 4 hpi and 4 dpi.(p-adj < 0.05|(Log2(FC) ≥ 1 or ≤ 1))
4hpi Up		4hpi Down		4dpi Up		4dpi Down		4hpi Up & 4dpi Up		4hpi Up & 4dpi Down		4hpi Down & 4dpi Up		4hpi down & 4dpi down
Gene Id	Gene name	Gene Id	Gene name	Gene Id	Gene name	Gene Id	Gene name	Gene Id	Gene name	Gene Id	Gene name	Gene Id	Gene name	Gene Id	Gene name
323919	alcamb	566499	slc16a10	436748	nkx6.1	30600	mid1ip1a	561123	fam222ba	79375	foxc1b	100151026	arhgef40	100000775	glula
553228	LOC553228	619262	ston2	563601	tm4sf18	101882239	LOC101882239	100302404	f8	799432	esama	402880	cox4i1l	100000492	mafaa
436731	dgat1b	100329385	egln1a	447835	cx47.1	378458	rbms2a	405801	rbm24a	572245	noxo1a	793537	si:dkey-211g8.1	101886418	si:ch211-139k8.2
568634	pglyrp2	556314	ttyh3a	797776	si:ch211-133n4.6	791197	zgc:158263	406767	sh3bp5b	386994	rab11al	566745	jac2	567592	smpd5
777792	sult2st3	553403	kctd12.2	100329171	bmp16	559550	si:ch211-202h22.8	110437729	LOC110437729	30458	gata3	101885860	LOC101885860	568405	csf1rb
360145	mxc	550580	sqrdl	100141332	slc6a18	436604	uox	798892	cxcl11.1	337243	sept9a	101886660	LOC101886660	795588	slc16a9a
563836	zgc:171566	101883564	si:dkey-216e24.9	100170821	rap1gap2b	494075	oclnb	407716	st6galnac5b	436703	pxylp1	336351	prg4a	393892	bzw2
569827	ubash3bb	402995	pus7	554141	c9	100136861	cishb	81880	anxa13	100141352	kremen1	108179235	si:dkey-42l23.5	100000322	trpv6
327462	hsd3b7	572027	ppat	558353	LOC558353	407680	si:zfos-1011f11.1	100535673	si:ch211-198c19.3	100536902	lsp1	567192	cd59	101884238	LOC101884238
334167	mknk2a	402865	si:dkey-4e7.3	566318	si:ch211-239f4.1	797346	spint1b	569561	arhgef25b	100005849	rhov	100537110	si:dkey-42l23.7	793920	il2rb
794716	dixdc1b	393226	slc25a32a	100333000	LOC100333000	550497	zgc:110333	100330213	si:ch211-258f14.2	114424	cdh1	103910163	LOC103910163	368424	snx9a
492794	arhgap28	100537553	LOC100537553	30121	flt4	566369	fam198b	100005110	c1ql2	405757	oclna	393096	lipg	100142639	timd4
541514	hhla2a.1	563556	itgb5	559490	tppp2	767678	cish	796377	sema4e	550539	slc18b1	100537060	si:dkey-117a8.1	100332384	si:ch211-215e19.3
557185	slc25a35	393606	kcnk5b	560295	si:ch211-102l7.3	571124	LOC571124	100884152	dicp2.2	30363	fzd4	436834	clic2	100005359	si:ch211-286b4.4
393682	lin7a	447838	coasy	791132	csrp1b	569443	prf1.9	100004180	LOC100004180	406290	itpk1a	100003911	cxcl19	559087	pla2g4ab
550429	steap4	561280	zfp36l1a	504088	enpep	406777	aqp3a	100330730	spata22	555744	grhl2a			335901	klf15
100003142	rpz5	402871	gstcd	544654	phox2bb	692297	depdc7	436763	ttyh2	100334431	col5a1			324910	sema7a
550242	nadka	58003	evla	567643	kif26aa	559754	tmprss13a	103910140	LOC103910140	560883	ptpn13			641492	sh3d21
407664	hbegfb	100334698	reck	557360	rgs3b	81587	cldnh	101886404	LOC101886404	558522	tshz3a			100535718	pdgfd
325004	sdcbp2	560966	si:ch211-158d24.4	570508	crp1	431726	zgc:91908	368917	adam8a	570390	apoc4			100329632	scarf2
100150939	nes	541345	zgc:110340	558146	mfsd4ab	777616	zgc:154054	337166	si:dkey-40g16.6	474349	magi1b			105665598	pigrl3.5
436669	tmem178b	436892	nup37	558291	hapln2	573631	rab11fip3	558721	LOC558721	566212	angptl5			799194	LOC799194
566739	fes	751652	zgc:153184	561639	dnah7	562009	spint2	100333627	gas7b	100320028	plat			567239	scn4bb
57987	adgrl2a	407653	prim2	84702	cp	449615	gcm2	393807	ppp1r3cb	558720	marveld2a			100151416	cdkn1a
110438075	LOC110438075	797433	krt8	450033	lrrc23	100317496	lonrf1l	797436	LOC797436	449990	phlda1			327364	wu:fi04e12
678622	tnfrsf9a	445166	ctu2	101883865	LOC101883865	100148342	atp8b1	449557	saa	494031	usp2a			100002095	zgc:162707
798260	si:dkey-40c11.2	368478	wdr75	100150707	LOC100150707	792389	si:ch73-78o10.1	402837	hamp	378845	tjp1a			30314	apoeb
553957	il10	406287	slc37a2	100148645	cacna2d3	81584	cldne	562569	plcd3b	431770	mpp2b			795084	igfbp5a
327483	si:zfos-943e10.1	101882466	LOC101882466	565650	zgc:174917	100535694	LOC100535694	792470	ccdc153	571757	LOC571757			568476	g0s2
550581	sar1ab	286747	mcm5	100005584	LOC100005584	559768	zgc:173593	794066	si:dkey-195m11.11	81581	cldnb			571770	adgrd2
795086	si:dkey-33c9.6	449652	tmem56b	100270763	scpp9	393364	ildr1a	100137122	zgc:172065	436639	tjp2b			30691	ephb4b
768144	afap1l1b	791210	ugt5b4	103911757	LOC103911757	568912	dok4	103911370	LOC103911370	108181204	ephb3			560593	si:dkey-159a18.1
321033	aif1l	402983	tcea3	503885	fut9d	360208	pvalb8	100884137	dicp2.1	100322372	si:ch73-222h13.1			797199	slc8a1b
100002266	LOC100002266	335288	gpr34a	140616	sox10	795321	si:ch211-202f5.3	100006233	arhgap23a	101884988	si:ch1073-209e23.1			564783	sostdc1b
494490	slc6a9	406364	elmo1	101886910	LOC101886910	447903	dhrs13a.2	767718	sult5a1	393570	irf6			556126	gal3st2
406299	sucla2	562659	si:ch211-197h24.9	393697	guk1b	353358	anxa1b	797181	LOC797181	569564	mical2b			436920	egr3
393336	zgc:64022	57925	cdc25b	100005952	hepacama	100151174	hs2st1b	561190	atp2b1b	777630	tmprss4a			493587	pcdh2ac
556591	prkchb	324256	orc6	100034656	si:dkey-211g8.5	100170833	zgc:194125	100537750	foxq1a	394091	sh3gl2a			335475	wu:fj16a03
797780	ssuh2.3	735291	hspa12b	386700	stm	790937	kaznb	368621	si:busm1-57f23.1	724017	crb3a			492802	rhoua
30591	hsp90aa1.1	678538	crp4	335716	nme2a	100148950	LOC100148950	796120	si:dkey-238d18.4	560413	mtss1la			100534731	LOC100534731
449958	tnip1	406285	chaf1b	101886937	cxcl13	406588	sstr5	325958	tsku	447845	cavin2b			336348	rcan1b
503764	zgc:112964	30678	pcna	100006456	fmnl2a	560322	pdlim2	552960	cybrd1	561689	magi3a			570638	apoc1
557792	dennd3b	338313	mcamb	100330575	LOC100330575	107988037	LOC107988037	100136865	abcb4	368461	lpar1			554836	cry1ab
436637	mob2a	394045	lmcd1	492777	cfhl2	100333048	LOC100333048	101886216	LOC101886216	110437876	LOC110437876			558181	ctdspl2a
573110	cbx4	100004850	aatka	100150834	LOC100150834	692332	cyp46a1.3	562840	rdh10a	100538001	gpr75			492476	csad
562344	hs3st1l2	393221	slc43a2a	799678	trim35-10	103910196	LOC103910196	556502	adma	352913	selm			100149838	pycr1b
562473	ncf2	556642	trub1	100536671	LOC100536671	554221	pthlha	559958	cdaa	562595	flvcr1			792084	slco2b1
793825	igflr1	192314	dtl	563654	nos2b	558938	si:dkey-30c15.2	322420	chia.6	560869	elf3			564061	si:ch73-86n18.1
567144	slc16a4	768151	dennd2da	554305	lta	791793	cxadr	403114	adm2a	570069	si:ch211-207d6.2			553162	hs6st1a
796404	plekhg5b	100332583	LOC100332583	568416	wt1b	100535492	si:dkey-62k3.6	101884620	LOC101884620	678612	zgc:136892			494487	nr1d1
334438	si:ch1073-138d10.2	100151195	mhc1lia	336211	zwi	557248	zmp:0000001114	406635	sgsm3					561012	plxnb1a
101884755	LOC101884755	492482	eif4ebp3	570839	c1qtnf6b	100270758	rpz2	414329	rap2b					564054	usp2b
554119	mlx	100334805	ccdc129	606664	dnaaf2	563405	gprc5c	100001258	si:dkey-96n2.3					100004528	LOC100004528
100537295	si:dkey-33c14.3	100332549	znhit6	108183933	LOC108183933	100330638	mslnb	100536790	LOC100536790					556087	wnt2bb
574423	rab24	641577	reep3a	550431	cldn19	798697	gfi1ab	100334565	si:dkey-288i20.2					100330048	brinp3b
402822	gcat	568080	stk35	393795	gpr143	100537283	ftr87	571252	adam19b					101886585	si:ch73-264i18.3
557055	pou2f2a	494152	nop58	564090	zgc:193593	100007673	gpr160	394032	irx2a					100004603	si:ch73-14h1.2
561067	mxf	100150242	si:ch211-269k10.4	563632	wasf3b	569335	si:dkey-33i11.4	100004033	LOC100004033					567956	lpar2b
561583	pcnxl2	393949	unga	795026	si:dkey-200l5.4	768299	zgc:153665	100148439	mcf2la					100149100	adra1ba
567537	cxcl20	553596	grapa	100331902	mocos	100333855	LOC100333855	100002203	si:dkeyp-13a3.10					791696	asic1a
100537452	LOC100537452	564600	sept12	100333111	LOC100333111	100005937	prrg2	559160	si:ch211-214j24.14					100535763	tmem265
793635	b4galnt1b	751707	acsf2	101884643	zmp:0000000924	100149472	pard3ba	793909	LOC793909					30286	ndrg3a
326287	epb41b	393192	pdcd2l	550561	ppp1r14aa	564030	bik	110439214	LOC110439214					100332699	LOC100332699
564048	plekhm1	492762	trip10a	407989	adssl1	564423	vsig8b	101886833	LOC101886833					568032	rbp2a
559428	ddr2b	406690	nsun5	101883587	sgk494a	560190	esrp1	561062	si:dkey-157l19.2					553673	zgc:112038
100007937	si:ch211-284o19.8	101883468	LOC101883468	563897	abo	336965	s100v2	359833	tfpia					556869	ponzr5
449552	fkbp1ab	325037	tsr1	474346	mag	368405	znf385b	100535415	LOC100535415					100001421	snx33
569040	plcd3a	192338	mcm2	368242	kmo	541408	prss60.2	556499	atp7b					564009	ciarta
321023	nnr	333997	ampd3b	30472	rx1	101883245	LOC101883245	100003900	chia.5					569386	pecam1
567105	taf1a	791456	acy3.1	445070	cldnk	100170782	zgc:194879	795914	si:ch211-278p9.4					562259	rsph3
394136	sept7a	108183639	LOC108183639	101885277	si:ch211-11c3.9	563926	per1a	30255	tfa					323528	dennd5b
100535838	LOC100535838	406404	ak3	192309	tpi1a	560806	grk5	554826	crip2					492328	ankrd9
557065	pxk	100332577	nop9	641488	ugt1a1	796684	si:dkey-87o1.2	246227	ptgs2a					563952	ccl34b.1
445073	socs1a	567145	adam11	101886968	cst14b.2	798684	zgc:194101	100332206	stk38b					567117	slc7a9
100038769	zgc:162182	567548	smpd2a	108179356	LOC108179356	556640	si:ch211-69b7.6	369193	aldocb					494131	gprc6a
30741	ctnna1	554146	gins2	436597	rdh12	100005267	si:dkey-51a16.9	560304	susd4					563432	si:ch211-79e4.4
566336	ldah	553204	crot	556181	slc1a3b	445297	gna14	777621	zgc:153952					393776	cox4i2
799954	ddah2	564874	tnfrsf21	559260	si:ch211-133n4.4	445208	camk2d1	561679	col11a2					100007813	LOC100007813
541515	myo1b	566257	si:dkeyp-23e4.3	378452	cdh17	100000389	si:ch73-347e22.8	565848	zgc:171470					570003	nxph2a
394012	itga9	564095	si:ch211-191i18.2	360151	opn1mw2	100073342	f2rl1.2	103908620	LOC103908620					560066	si:dkey-4c23.3
100149048	si:zfos-80g12.1	101884099	si:ch1073-90m23.1	110437772	ptx4	327274	elovl7b	114405	cx27.5					571228	znf326
798998	gp1bb	100002878	fam78ab	560024	slc47a2	368397	pkp3a	562442	col8a1b					792667	si:dkey-276j7.2
100538309	si:dkey-166d12.2	557460	gb:eh507706	394213	sb:cb1081	692291	foxn3	108179114	LOC108179114					368250	prickle2b
100009663	atg9a	567408	si:dkey-151g10.3	321928	phgdh	100001416	stard14	447878	acot7					559001	fasn
541371	en1b	100007704	slc7a8a	404039	npsn	799158	si:ch73-127m5.1	559737	illr4					103910418	LOC103910418
30120	dlc	100333113	lyl1	325875	dgat1a	550503	vsig8a	561338	pde11a					337730	capn8
100330176	chadlb	336998	chek2	110437731	LOC110437731	335888	mylipa	541527	ocstamp					101882436	ogmb
353363	anxa6	108179053	fancb	368234	plp1b	402977	tmem45b	493588	pcdh2ab2					570238	fosaa
406528	tdh	567601	shq1	556125	si:dkey-7i4.24	406738	cfl1l	571431	LOC571431					797711	LOC797711
561943	neurl1aa	101243556	tmem173	100536585	si:ch211-137j23.9	550508	grtp1b	553701	gda					100006005	arrdc1a
641321	snap23.2	326022	si:ch73-158p21.3	140429	gnat2	436598	pls3	677747	flj13639					100332204	zmp:0000000884
100536572	LOC100536572	567234	lrmp	326281	mbpa	553374	rab11fip1a	100334689	LOC100334689					100000956	golim4a
554810	cd22	337532	wu:fj81e10	58128	fabp7a	561520	fam83e	406459	zgc:77112					767689	bcam
571368	crfb17	30746	tie1	368305	nptna	558079	si:ch211-195b15.8	108180211	LOC108180211					556807	si:ch211-186j3.6
415184	msrb3	492361	cab39l	559555	si:ch211-217k17.12	334253	trim35-27	561889	gra					100001934	cldn17
403051	pygb	436795	hgh1	327320	f5	321330	rhpn2	767684	itln1					767739	neurl1ab
100000923	si:dkey-11p10.10	556995	lig1	100332249	ecm1b	554458	zgc:100868	100101640	apoa1b					553350	cgnl1
565106	capn1b	447872	dscc1	100333601	mmp25b	402821	cx30.9	100001836	itgb3b					559377	bspry
405810	ehd1a	58153	slc40a1	100148254	LOC100148254	393380	tspan35	103909724	LOC103909724					170846	appb
554708	zgc:113176	798364	hibch	101885014	LOC101885014	550380	cx35.4	100537783	si:dkey-77g12.1
101884429	LOC101884429	792923	rnmtl1b	30582	opn1sw1	447825	mfsd6b	110437865	LOC110437865
445108	htra3a	100000026	aldh3a1	555317	si:ch211-276a23.5	571948	nr1d4b	100006250	LOC100006250
564424	soat1	100151626	tatdn1	100536946	LOC100536946	393501	marveld3	566658	si:ch211-117m20.5
619272	zgc:113314	30370	fzd2	406363	scinlb	553218	lsr	108190486	LOC108190486
103909128	LOC103909128	337598	mcm4			445134	zgc:100864	568650	wu:fb95e10
564960	gata1b	402798	qtrtd1			561563	nuak1a	541486	mfge8a
437006	nxph1	555578	rxraa			447819	eya2	100151013	si:ch211-198c19.1
571584	marco	553298	trmt1			767681	btr12	100141339	zgc:171509
324900	txndc12	100415792	ugt5b3			497312	cobl	445319	ncaldb
30291	cdh2	394196	nop56			393219	sh2d4a	436825	s100b
560951	xylt1	563053	capn2b			553515	si:ch211-95j8.2	566599	si:ch211-117m20.4
571743	oafb	562283	prkdc			100037319	nme8	100331397	si:ch73-106k19.4
393297	zgc:56585	555377	zgc:162780			101886901	LOC101886901	569162	si:dkey-33i11.1
321502	krt96	321119	mcmbp			566880	myo18aa	558810	ppp2r2bb
321177	si:ch211-153b23.5	192323	mcm3			100330243	LOC100330243	798849	si:ch211-217k17.11
108182577	LOC108182577	321059	rrp1			572016	pcdh1b	103909884	LOC103909884
560083	si:dkey-182g1.4	780840	fam26f			101884183	si:dkey-191g9.7	100007510	si:dkey-24c2.9
557634	si:ch211-147k10.5	777758	hps3			100330782	tmem79b	567804	fbxo41
393608	ptger2a	558314	dapk1			566546	plxnb3	100534701	cfap99
562822	bmpr2a	541492	zgc:110843			556256	camsap3	767737	foxj1a
406596	socs3b	368450	ing5b			325938	plxna4	100536356	si:dkey-15j16.6
792472	zgc:158446	100415799	ugt5b2			100332737	LOC100332737	58085	prph2a
100333117	si:cabz01101003.1	323439	slc1a3a			100002762	dscaml1	450047	syngr1a
565656	bcl3	393379	zgc:64065			558601	pipox
447858	dirc2	561001	cd83			101883154	LOC101883154
566752	si:dkey-102g19.3	553453	samhd1			568018	rpgrip1
792824	pgp	100148927	mettl8			561336	pcdh17
797571	LOC797571	445390	mybl2b			796449	si:dkeyp-98a7.1
100332407	si:ch73-173p19.1	65239	map2k6			568891	si:ch211-79k12.1
323529	hnrnpa0a	447856	utp3			431748	dbnla
796425	card9	407707	terf2ip			503601	zgc:110788
555436	cep85l	563091	si:dkey-206m15.8			140618	tfap2a
335994	il12bb	559409	si:ch211-217k17.7			562904	slc9a2
402847	cyp2x7	393143	umps			563122	marveld2b
101886351	ly86	100000140	si:dkey-225f5.5			641564	zgc:123295
336526	b3gnt5a	560482	rad54b			447897	ap1s3b
564748	LOC564748	559868	arhgef9a			171478	fabp3
102216265	sox8a	108190423	LOC108190423			553062	si:ch73-70c5.1
100151593	lhfpl4a	678588	emg1			798008	acot9.2
566871	si:dkey-32e23.4	436619	acy3.2			100536813	si:ch1073-340i21.1
557893	lipeb	334050	gtpbp4			334500	scamp2l
797907	dnajc5ab	436766	jdp2b			393515	stx3a
564097	ptchd4	613144	dkc1			572235	wu:fb18f06
798740	eda	100148935	ushbp1			436712	tspan18b
103908642	LOC103908642	442932	gnl3l			553524	b4galnt3b
568857	si:ch211-194m7.8	554096	noc4l			337489	plcd1b
393877	derl3	103910066	LOC103910066			100034506	tmem238a
406339	hk2	108181220	LOC108181220			560512	si:ch211-119e14.9
404232	chst11	100005476	si:dkey-56f14.4			368288	rassf7b
797988	fis1	30430	dnmt1			58084	tnnt3a
550535	zgc:110182	393106	rad18			387303	gbgt1l4
555791	zgc:162952	558403	mutyh			556994	ppm1la
555316	kin	101882781	LOC101882781			569894	prr13
558355	zgc:162972	406715	cdk2			81585	cldnf
557975	si:ch73-256g18.2	100148293	si:dkey-9k7.3			561906	chrnb2b
101885327	cd180	556362	alkbh8			569931	cadm1a
573996	chordc1a	550236	cdca7a			338307	ftr82
100329297	serinc2l	566409	mcm6			497576	ttc22
100526652	ptprr	393774	pole3			550425	b4galt1
259195	caska	558718	rrn3			795597	si:dkey-222h21.8
100003534	gpr141	553068	im:7148292			503735	eps8l1
565988	plekhg2	559384	prf1.5			405875	zgc:85932
386787	itga5	445399	ddx56			492766	svopl
566968	si:dkeyp-115a10.3	100151157	si:ch1073-157b13.1			563060	s100u
100333928	alpk1	564674	LOC564674			100317614	arhgef38
100334656	si:dkey-31e10.6p	559330	fam13a			793480	kcnk1a
101884711	si:dkey-238d18.5	114447	cxcr4b			30679	prox1a
494099	ephx2	406350	uhrf1			445506	emp2
101886651	si:ch1073-385f13.3	445387	ddx51			324942	grhl1
735292	limk1a	282559	aldh3b1			678546	sptssb
436858	tcta	100000884	LOC100000884			796100	slc7a4
336933	rhogb	393552	slc25a34			567909	LOC567909
571290	sema4ab	406261	pdcd4a			335521	efhd1
724010	dgkaa	393361	pigm			664761	id4
101882836	si:ch211-212k18.6	321130	nop2			561247	shda
100537857	pstpip2	30740	rrm1			567134	zgc:153916
101882391	si:ch211-63b16.4	323426	mphosph10			101885685	LOC101885685
100003209	ifitm1	325896	cnp			100005752	cgnb
751594	rassf6	556424	rhoga			569109	dbpb
100004843	si:ch73-27e22.6	436921	slc38a5b			799099	lpin1
30167	drl	100537903	si:dkey-239h2.3			437022	tyrp1b
100150664	met	560548	si:ch211-15b10.6			492758	fgf13a
497350	sipa1l2	550331	elp4			402965	eepd1
58108	fth1a	797099	fam207a			565041	pim3
100536291	zmp:0000000634	503732	rtel1			378722	rdh10b
100334819	mcoln3a	103908782	mfsd7			571837	zmp:0000001167
554127	tubb2	286787	diexf			492494	vsnl1a
436769	homer1b	100034442	si:ch211-222k6.3			100332245	cobll1b
445472	myo6b	553506	nucks1b			557813	zgc:194930
570014	LOC570014	567734	dtymk			796128	tmem79a
321937	frmd6	796456	pold2			142986	ptk2ab
569469	snx10b	327053	rrp15			497601	tnks1bp1
797699	ssuh2.2	555663	si:ch73-70k4.1			101883471	LOC101883471
100331859	si:ch211-194m7.4	101884507	LOC101884507			101180909	shroom3
790934	mapkapk3	327239	usp36			393993	ralaa
558708	gabbr1b	799570	nasp			569201	mal2
280651	ets1	492514	dph5			553811	sh3d19
324098	cd82a	317637	wdr43			393906	nt5e
559250	im:7152348	30471	qkia			678605	crfb12
541417	pgap2	503748	rfc2			373089	tjp3
558684	b4galnt1a	798982	ptbp3			100536897	si:rp71-1h20.3
404035	traf4b	553452	si:dkey-180p18.9			557665	pvrl1b
100005623	tmem120a	317644	nifk			553349	znf185
564076	unc13d	553366	ccr9a			777640	zgc:153929
100334848	si:dkey-17e16.17	447833	hat1			100332627	epb41l4b
558500	oxnad1	641291	ahrra			567346	uhrf1bp1
565637	fgl2a	100147938	LOC100147938			570956	sgk2a
30364	fzd5	767807	abi3a			564539	si:ch211-225h24.2
114401	bcl2l1	103912059	si:zfos-1069f5.1			767680	zgc:153760
565225	cpne2	192305	adssl			449936	ppl
101884255	LOC101884255	393863	heatr3			558816	LOC558816
570401	kcnn1b	402943	stard10			794486	krt4
678516	tnfaip6	436998	zdhhc3a			100333474	LOC100333474
494176	rdh12l	403070	rgn			550482	zgc:110353
393792	kcnip3a	562399	enpp1			568764	plekha6
368902	si:ch211-214p16.2	447817	zgc:92161			100331195	il17rel
568408	si:ch73-111k22.2	405879	zgc:85858			566118	adora2ab
571217	tnfrsf18	561624	snx22			326923	rab28
799279	LOC799279	436707	havcr1			567762	myclb
266796	sec61a1l	30068	cat			100192211	ccl19a.2
100332827	zmp:0000000881	553526	zgc:152774			402831	cyp27a7
100334259	cntrl	100536120	havcr2			30612	bmp4
555524	si:dkey-261j4.4	550421	znf367			108180759	LOC108180759
103909412	LOC103909412	192312	mak16			100320357	ttc39a
795494	si:ch211-256m1.8	100329277	si:ch73-308l14.2			406448	mpzl3
436713	tceb1b	553606	nle1			406351	ripk4
555366	itih5	557083	ehbp1l1a			796455	col4a3bpa
100536137	si:ch211-241b2.5	393201	polr3c			108179043	LOC108179043
560699	si:ch211-214c7.4	378844	ddx27			566781	aim1b
100334568	pde5aa	407727	slbp			794438	si:ch211-282j17.13
798487	cdk17	393195	rnaseh2a			103909362	fam177b
108181592	LOC108181592	101886606	si:dkey-37f13.4			334217	elovl7a
393249	zgc:56525	415149	lum			553459	dock6
553460	snap29	327491	rpa1			567758	rltpr
100005567	gpr155b	797512	fut8a			100334731	LOC100334731
555448	snx8a	393886	mad1l1			100149080	LOC100149080
110438138	LOC110438138	100000104	stra6l			406737	cd9b
100001748	vash1	449778	dtwd1			100331190	LOC100331190
792610	hspb6	556612	serpine3			436937	nipal4
553503	fbln2	81540	tyms			58109	valopa
569945	gfpt2	559502	mrc1b			100534921	si:dkey-17e16.13
564177	nrbp2a	393171	tpst1l			559237	si:dkey-61p9.4
100003849	si:ch211-157p22.10	561131	nolc1			556280	cyp2u1
100150349	si:dkey-27h10.2	337520	si:dkey-256h2.1			553607	camk2n1a
492480	rnf24	566307	si:dkey-48p11.3			557459	igsf9a
793765	prlh2	797198	rrp8			101886060	kdf1b
415197	nudt15	386897	asf1ba			335127	tanc2b
751677	batf3	100538158	LOC100538158			565630	si:ch73-95l15.5
563270	prelid3a	436988	zgc:92360			565844	rhobtb2b
100332460	clcc1	368631	pms1			393412	klhl24b
566019	acss3	406760	eif4a2			571549	kank2
103911838	LOC103911838	436999	wdhd1			352941	zdhhc8b
567667	slc12a7b	553066	pyroxd2			557524	unm_sa1261
403139	tlr5b	402856	twistnb			100329330	rgl3b
100049705	lama2	431754	acaa1			100150814	ksr1a
30072	inhbaa	100318301	dhrsx			30447	ncam1a
393548	gadd45aa	445388	rcl1			564660	LOC564660
494039	c3a.6	562403	si:ch211-1o7.3			798430	tmsb1
30177	ikzf1	335176	pon2			100007661	paqr5b
101884045	LOC101884045	406479	orc5			566832	dpp6b
321695	smurf1	386763	tead3a			567402	myo5b
30219	efnb2a	100415796	ugt5b5			65233	six4a
324152	tax1bp1b	100538242	LOC100538242			100001225	st6galnac2
556409	g3bp2	447938	rassf2a			30436	eya1
431715	rbck1	553368	mgmt			101884800	LOC101884800
393904	gipc2	445151	entpd1			445085	rasgef1bb
334219	zgc:77650	393652	lyar			100332380	cers3a
101883373	ptgfrn	337399	rrs1			245702	igf1rb
337424	arl8ba	436735	dusp23b			100333265	LOC100333265
246226	ptgs1	445385	rfc5			100333266	LOC100333266
566122	ncam3	321127	ddx18			393813	pdlim7
103909286	LOC103909286	569375	eml2			100331179	acer2
556618	tp53i11b	322041	ip6k2a			403021	ap1m2
387591	ivns1abpa	403137	tlr8a			565446	tjp2a
406420	wls	494093	spice1			567620	si:ch211-95j8.5
100001845	slx1b	406329	dhps			447904	ildr1b
100536712	si:dkey-16p21.8	317740	pola1			393735	gchfr
100536909	si:dkey-31e10.5	100334023	tmem63ba			100004225	sb:cb230
553776	calcoco2	445162	dimt1l			562670	klf5l
561983	usp6nl	100149956	rgl3a			100004155	fam110a
558324	sytl5	100151586	zmp:0000000930			445244	ap1m3
368901	si:ch211-214p16.1	678543	zgc:136858			110439918	LOC110439918
100537878	ldlrad2	100001516	si:dkey-222f2.7			445198	suv39h1a
326099	plekhg4	393538	polr1c			503893	itga6a
57969	copz2	100003553	dis3			100006951	nrg2a
561268	tnfsf13b	80872	sms			103909482	LOC103909482
564015	cnih3	321289	noc3l			794862	epn3a
566455	jag2a	110437974	LOC110437974			799340	si:ch211-207j7.2
567472	LOC567472	405841	zgc:77086			100331987	LOC100331987
402851	oprl1	794026	camk1b			100148750	LOC100148750
793303	cited1	100149618	p2ry12			449994	pawr
101885900	LOC101885900	561339	rap1gap2a			406493	myl9b
337376	alox5ap	393717	smfn			565986	rnf145a
406342	tcirg1b	570351	wdr4			550481	rhoub
553683	lpcat2	569546	ehd4			103910120	LOC103910120
541344	prdx1	110437990	LOC110437990			791193	si:ch211-285c6.2
100006805	LOC100006805	394198	fosab			101882295	ggt7
415241	calua	556716	si:dkey-7i4.1			100141367	cers3b
100034410	rmdn3	192333	mcm7			108179687	LOC108179687
378993	satb1a	565109	agap2			561197	ptprga
436682	rbpms2a	335987	gypc			550268	zgc:110283
336563	wu:fb13g09	541538	zgc:110540			767730	rnf183
563054	gramd1c	563411	mms22l			565921	fzd3a
393551	cyba	402884	tlr21			101885895	LOC101885895
100149322	mast4	103909419	LOC103909419			569437	cntn3a.1
557062	fmnl1a	562350	nup107			564098	pof1b
431731	litaf	790939	zgc:158403			368249	prickle1a
571744	oafa	562343	specc1			100004523	LOC100004523
568008	wwtr1	557205	phykpl			101882936	reps2
797213	si:ch211-42i9.8	560765	robo4			405819	agmo
100008366	LOC100008366	317739	ppan			794494	ppp1r16a
100003611	si:ch211-26b3.2	286778	c19h1orf109			100331355	hecw2b
100333254	nfatc2a	553498	si:dkey-251i10.3			567389	igsf9ba
192336	atp6v0ca	100415791	ugt5b1			100002190	cyth3a
570279	zgc:194281	393744	dctpp1			100537098	LOC100537098
335409	socs3a	436833	gstk1			101884972	mtcl1
437017	abhd17b	110439893	LOC110439893			393212	eps8
799479	adgrg3	108181194	LOC108181194			100150280	LOC100150280
560417	ptpn23b	334271	nufip1			100884132	ppp1r1b
568044	sall2	415238	rpp40			84040	clic3
393393	adprm	393596	wdr46			556677	mfap2
569735	slco3a1	100141330	zgc:171534			566542	sgip1a
555737	prkcz	560000	cpt1ab			568794	col17a1b
565029	tnk1	260437	msh6			393504	rasd1
504038	si:ch73-138n13.1	100147913	bard1			335485	plpp2b
559102	rangrf	317744	dnmt3bb.1			556392	strip2
566550	si:ch211-260p9.3	557086	tp53bp1			378970	rgs12b
100150678	taf4b	564078	trmt5			100005208	stard13b
325287	wbp2nl	394064	exosc10			571486	plekha7a
560601	slc8b1	562542	LOC562542			565426	si:ch211-67f13.7
678636	mettl27	100000119	tmem245			335530	wu:fj19g03
378724	arf5	101883054	LOC101883054			553238	esyt3
557660	palld	503603	dph6			447881	gbgt1l3
566849	cyth4a	324490	eif4ebp3l			393285	irs2a
100150414	si:dkey-85p17.3	559790	si:ch211-106h4.4			100332544	fermt1
557738	ccny	406275	fbl			373136	evpla
30554	pla2g4aa	324215	igf2b			561285	plxna2
559784	amotl2b	553760	psip1a			563606	sigirr
403027	snx10a	393262	pwp1			140633	per2
393809	cap2	436706	dnajc9			564464	lnx2b
100317168	si:dkey-221j11.3	797259	si:ch73-92i20.1			101448000	pappaa
557997	olfml2ba	80963	rnd3a			108183587	LOC108183587
30496	ldha	100536590	atxn7l1			794081	ucp3
569085	slc19a2	327379	calm3a			101885785	LOC101885785
555272	rabgap1l	393105	hsd17b4			767638	ftr86
560569	zgc:162964	406778	exo1			570370	si:ch211-140m22.7
406415	tmem263	563212	chaf1a			101883199	si:dkey-196h17.9
560100	adora2b	494053	lxn			799376	si:dkey-71p21.13
335269	itgb4	100005116	arhgap24			450067	ormdl3
100321084	si:ch73-52p7.1	100535890	LOC100535890			101882312	LOC101882312
406397	mmp9	559014	si:ch211-136a13.1			568158	slc44a5a
566275	arhgap42a	406435	rfc4			101884661	si:ch211-285c6.6
338247	echdc2	393313	ube2nb			557886	hlfb
100002795	doc2d	393947	arpp19b			101882642	LOC101882642
321070	rock2b	492474	dennd2db			393609	myo1eb
101884451	LOC101884451	110439153	LOC110439153			565700	sat1a.1
100333587	si:dkey-238f9.1	100149189	si:ch73-237c6.1			100330483	cpeb2
101883094	ccsapa	405878	fbxl15			777735	fgf12a
322339	cs	492346	fosb			327162	tmem51b
570288	flncb	30130	men1			799520	LOC799520
100329505	hgsnat	100000715	msl1a			402799	degs2
568021	tp53inp1	100330448	peo1			100148489	si:ch211-15j1.5
553565	wbp2	110437880	LOC110437880			100038777	zgc:163022
394139	hpcal1	553232	znf296			794675	si:ch73-306e8.2
445223	nek7	30440	prim1			100038799	mink1
791578	dhrs11a	449835	dut			394150	oxsr1b
323588	pik3r5	550335	zgc:110224			103911153	LOC103911153
570079	LOC570079	445389	gtf3aa			564531	si:ch211-132b12.7
569441	tp53inp2	406637	mre11a			793842	si:dkeyp-72g9.4
406604	gng12a	407696	ddx52			557131	si:ch211-285c6.3
100135755	il6r	767738	abi1b			569963	snphb
100537993	LOC100537993	553485	rnaset2l			100526672	ptprsb
555612	orai2	445401	cenpl			553661	homer2
566131	eif4g3a	556277	cblb			566175	zmp:0000001200
553646	sptlc2a	566185	caspbl			100007048	bcl2b
100005700	stim1b	335236	ndc1			110439800	LOC110439800
791107	hs6st1b	325106	utp15			407651	prlra
327197	vcp	792693	cd3eap			796419	mhc1ula
394244	ndel1a	541348	bccip			796739	mast1a
406650	timp2b	393664	tuba8l2			100537502	LOC100537502
100005593	adam8b	564127	foxp1a			556743	sema6e
100333889	si:ch73-209e20.5	560447	LOC560447			393613	kdelr3
445320	hspbap1	406259	hprt1			323738	ankhb
541520	cdcp1a	336470	pak1ip1			407987	arhgef18a
641327	ca10a	563803	ccr12a			563771	bhlhe41
58026	psen2	100007383	dicp1.1			333987	fxyd6
564081	dlg3	556456	pold1			110439555	LOC110439555
100330160	nampta	337179	mmp2			798256	si:dkey-262g12.10
405764	blnk	322508	h1fx			562138	hip1rb
558476	stard8	445178	aarsd1			557389	soul2
794796	rai14	58120	nme6			570991	si:ch1073-340i21.3
570455	cyp7b1	799208	zgc:194627			569216	lrp11
100334777	dfnb31a	100331810	LOC100331810			100073343	rapgef5b
751741	spg20b	393839	scp2a			30558	pax9
103909698	LOC103909698	386632	ddx49			570918	si:ch211-150i13.1
563506	tiparp	557196	slc24a3			792628	si:dkey-18a10.3
571305	gnav1	326846	cnbpa			100334940	traf3ip2l
322178	si:ch211-168f7.5	101882856	LOC101882856			798385	qrfp
394240	ahcyl2	100334190	si:ch73-376l24.6			566735	insb
572256	zgc:162879	327590	tk1			101882405	sowahab
399546	pxna	192320	pole2			445158	slc16a9b
100004946	trpm4a	100003674	si:ch73-31d8.2			553801	fam219ab
569642	tac3b	386707	fen1			571092	LOC571092
100149559	cbln11	321133	nop14			563087	si:ch211-129c21.1
567428	vwa2	796551	tert			337865	nkx3.2
561333	abhd13	641495	poglut1			407634	ptpn4b
556763	tmcc3	100537724	si:dkey-102m7.3			100034581	ctnnal1
570436	nid2b	30098	hhex			100149352	LOC100149352
337663	mxe	405818	cyyr1			794425	LOC794425
619253	snx1b	415170	slc12a2			407735	gria4a
100331457	l3mbtl4	321652	wdr12			562262	tnfsf10l3
373107	birc2	101883079	LOC101883079			554232	ephb2b
100331729	tmem176l.4	563613	eif2b5			110438218	LOC110438218
568432	wdfy3	541421	pop5			100192213	zgc:194282
558391	sdk1a	100003787	nhp2			606660	aqp9a
553196	tmed8	326906	suv39h1b			368436	celsr1a
100002392	LOC100002392	560338	elp2			64273	atp1b1b
101885611	LOC101885611	406727	nudt1			561024	slc6a13l
100136840	serpine1	569665	pdik1l			100148828	b4galt2
436979	lygl1	322000	anp32b			793139	evplb
30644	mtmr2	550234	exosc2			100002503	LOC100002503
503760	poc1bl	394040	surf6			445059	adprh
337199	rab20	322854	anapc5			101885373	LOC101885373
556711	gpr18	797949	LOC797949			794176	igfbp2a
393469	gmppab	368433	inppl1b			751784	htr2b
57926	gpr173	567366	prr11			100004299	LOC100004299
393590	fam84a	497376	kntc1			100334453	kcnc1b
100322074	si:ch211-171h4.5	794348	nrde2			368847	triob
445106	yipf2	100037359	rgs13			101885028	akap7
108181174	LOC108181174	110438398	LOC110438398			555362	tns1b
393366	rasl12	393255	slc46a1			571427	ftr15
393814	plek	404040	dab2			559686	si:ch211-207e14.4
110438342	LOC110438342	100000577	ppp1r14bb			796767	hspb11
406296	atp6ap2	402808	rrp9			568734	trim16
553656	hrasb	504044	st3gal4			795793	tmem238b
570117	si:dkey-7l6.3	321745	wdr36			101883152	si:ch211-121j5.4
560743	lpxn	406860	ipo9			100535067	LOC100535067
402948	cd151l	450061	gins1			100330019	aff2
100322075	adm2b	373884	cecr1a			100148751	LOC100148751
335453	grnb	541478	sorbs3			103908668	LOC103908668
378478	egfra	404211	pik3r2
445410	il12a	101886537	LOC101886537
394066	lin28a	393257	polr3d
101884098	LOC101884098	492783	dhrs13a.3
558071	atf6	100333127	rexo4
793969	ccser2a	553029	rad50
103909146	si:ch211-243a20.4	373866	cbr1
100004161	tbx5b	556206	slc43a3b
431740	zgc:91860	563907	antxr1c
337583	atp6v1ab	100003922	p2ry1
406598	pik3cg	336518	polr3e
100000647	kctd13	571845	siva1
393583	tbc1d5	325603	polr1b
321724	atp6v0b	110437825	LOC110437825
100149497	rapgefl1	100005387	rnaseh2c
569271	ankdd1a	108182910	LOC108182910
103911274	si:ch211-105j21.9	100002462	wu:fi42e03
798092	si:dkey-76i15.1	795679	si:dkey-42l23.2
553707	prelid1b	497183	grhpra
567536	myo1ca	100318936	rasa3
798401	tex2	541444	nmd3
100537860	LOC100537860	492520	pgrmc1
555957	ephb3b	402878	mpp6a
393940	atp2a2a	554509	orc1
336888	susd6	192316	terfa
557652	si:dkeyp-27c8.2	492350	s1pr5a
558940	sacm1la	492813	fut9b
793937	agtrap	65226	rpa2
321056	zgc:63569	100333229	kiaa0101
492796	zgc:101663	393222	ttll12
407681	foxf2a	559752	slc22a18
406816	cul1b	768177	deptor
559351	trim35-28	565964	sdr42e1
415183	tubd1	101886905	LOC101886905
323922	dnaja1	100537160	arhgef5
387000	slc25a37	406369	prpsap2
335625	adcyap1b	393291	rbm28
557826	tmem145	553616	nip7
565945	si:ch211-255g12.8	571044	si:dkey-201c1.2
110439249	LOC110439249	322715	dus1l
393762	si:ch73-141c7.1	393162	chek1
368439	mycbp2	565859	asap1b
393902	rab7	406462	orc4
556360	stim1a	101884146	LOC101884146
558801	fezf1	798497	msantd1
108179692	LOC108179692	447855	cratb
100333504	lamtor5	323269	zbtb16a
100150092	si:ch73-226l13.2	571706	zmp:0000000926
569071	ptprh	572146	cdk14
393915	rabgef1l	767797	utp18
393135	zgc:55621	100535079	LOC100535079
556779	ksr1b	553462	ddx24
541491	pvrl3b	407665	sccpdhb
58118	bdnf	393882	tubg1
797867	carkd	317639	tsr2
406265	agpat4	561376	pus7l
570828	mgat3b	563346	capn5a
561279	pdzd8	100318335	anapc2
100884153	dicp3.3	100003642	si:dkey-246g23.2
100001136	si:ch73-61d6.3	641415	zgc:123107
550523	stoml3b	393970	acy1
100000686	zgc:171601	334529	aqp7
797731	irgf3	100151335	LOC100151335
108180802	LOC108180802	437001	adck3
566820	rnf38	566459	myo1cb
103911521	LOC103911521	768152	ube2t
415244	ap3m2	550247	exosc7
566376	zgc:172136	550447	osgep
541488	tcp11l1	100536838	zbtb47b
373081	mvp	402904	nit2
555345	ccdc13	445395	esco2
559568	tbkbp1	568826	si:ch211-266i6.3
550265	zgc:110286	402955	thumpd1
30183	acvr1ba	503884	fxyd1
569828	rgs16	406571	cirh1a
567286	gdpd3b	442931	gins3
100330897	slc2a3b	368275	ppm1g
553351	clcn7	567027	mbnl3
449548	ppp2r1bb	405867	crls1
557247	btbd10b	286777	ddx54
568671	atp2a3	101885830	LOC101885830
799483	si:ch211-251j10.3	558814	haus6
561518	si:ch211-120p12.3	436749	polr3h
101883560	LOC101883560	561073	zgc:194981
386613	pdca	569805	mdc1
100150119	si:cabz01007802.1	110440171	LOC110440171
407714	zp3a.1	336619	eif4bb
572452	bmp1a	794946	si:dkey-18p12.4
568159	ago3b	100535879	LOC100535879
100148988	kalrna	100913078	fcho1
558571	gramd4a	553728	ttc38
557810	mapk12b	548604	nr4a3
100332241	tespa1	445239	gpn1
567657	arl15a	326746	cbx1a
567039	cdc42bpb	378847	mtr
378720	ical1	563577	ppp1r13ba
550402	arf4b	563353	si:ch211-106n13.3
449806	fbln5	100002141	LOC100002141
570321	si:dkeyp-117h8.2	406516	khdrbs1b
445322	chst10	64256	efna5a
322513	uap1	321193	paics
555906	ppargc1b	553608	tbl1xr1a
405822	pgm2	195817	lmnl3
553415	rhobtb2a	368900	pcgf1
393946	gnai1	564388	tut1
497649	tcf7	562530	si:ch73-103b11.2
30725	chrna1	405856	wrnip1
445153	itsn2b	323089	ctdspl2b
447908	osbpl3a	561000	LOC561000
767660	tank	557999	tdrd5
557239	antxr2a	58141	gart
566552	si:ch211-241j12.3	406768	zgc:55262
445275	sdf2l1	100535215	pogza
565287	daglb	565473	prdm11
368620	abcc4	567649	arhgef10lb
550445	acta1a	406587	rpf2
100534664	si:ch211-153f2.3	322089	ctps1a
402795	sts	110439959	LOC110439959
100536983	LOC100536983	100151075	abca5
571530	si:dkey-21a6.5	100534720	isg20
100329583	si:dkey-211e20.10	286745	ddx55
100007087	si:dkey-23i12.7	768164	rgs18
550224	lhfpl2b	100007503	LOC100007503
65230	ctbp2a	337172	cpn1
566945	mmp14b	573145	khsrp
556735	LOC556735	768182	mcu
101886857	si:dkey-288a3.2	767657	abhd12
402833	camsap1a	573988	kif15
449616	bcl9	566166	zgc:136564
100151629	tnfrsf9b	406805	nvl
792319	saga	794481	zgc:174972
100093702	si:dkey-121a9.3	103908820	LOC103908820
559679	ptprja	58098	arntl1a
393544	psmd3	100332622	spata5
65227	rgl2	327124	lrwd1
100534830	LOC100534830	566523	arhgap27l
560933	pvrl2l	407984	thrap3b
555531	si:ch211-152p11.4	334101	eci1
407677	lrrfip1a	100537120	ppef2a
83414	ssr2	334121	hacd2
570749	si:ch211-264f5.2	101886542	cmtm8a
564147	glsa	550271	gemin2
100006636	si:ch211-216p19.6	492340	cln3
101886860	LOC101886860	556493	ncapd3
368489	fam101a	30101	skia
394011	vti1b	556236	acacb
100005628	si:dkey-191c17.2	100034473	atxn10
100073333	mon1a	565315	slc6a15
100001663	si:dkey-32e6.3	436727	gtpbp10
557091	wnk4b	768188	zgc:154125
436586	ccm2	402998	plxnd1
402797	sycp1	436633	slc25a40
100537934	ap5z1	100535934	si:ch73-158p21.2
559270	slc1a6	554842	acot11a
100856806	gb:bc139872	566847	pot1
100150889	tapbpl	561406	ptgir
799901	reep1	100526683	aldh1l1
100007521	socs1b	100007463	tle3b
100001648	tmem199	337046	ranbp1
100009657	rps6ka3b	368390	plk4
678537	xkr9	100003049	dus2
561496	nuak1b	565314	cdan1
378718	drd2l	393391	tpst2
556950	ppm1j	556846	si:ch73-311h14.2
402819	cnpy1	550514	utp23
563746	traf7	393196	rpa3
503709	pqlc2	322059	pola2
447821	sav1	100536757	LOC100536757
322160	pdia6	337572	ctss2.2
100192219	gch1	402823	bxdc2
406468	dhdds	386844	ssrp1a
100150997	adora1b	449662	acox1
568195	napbb	100150488	lrch2
445139	bag3	797513	b3gnt2l
494048	tspan5b	100005846	si:dkey-56f14.7
393281	ctage5	561960	si:dkey-229e3.2
436964	gpr137	110438240	LOC110438240
447844	slc35b1	553950	rnf130
795469	ccl19b	101885447	cntrob
100073328	slc38a3a	323723	dnmt3bb.3
570573	tpra1	335495	parp3
569395	npr3	393317	diabloa
406319	snn	387255	rbm19
334983	wu:fa11c10	100150288	elovl6l
554650	bnip3lb	323659	asph
100329613	hcar1-4	30172	nup93
402885	sh3glb2a	100331439	slc29a1b
327294	gatsl2	563181	map2k2a
503946	fhod1	321700	nol11
557200	limch1b	449829	galk1
548603	snx18b	327348	znf710a
571249	arid3b	335231	fbp1a
572325	dym	566981	si:dkey-3k20.4
80939	papss2b	566787	cdt1
445197	fam219aa	100330721	axl
553634	casp7	321544	prpf19
562137	slc38a9	557028	igf2bp2b
562786	si:dkeyp-94b4.1	321277	mybbp1a
101883669	si:ch211-194m7.5	561039	elp1
108179036	LOC108179036	30086	nme7
563388	si:dkeyp-72e1.9	393632	mlh1
565172	map7d1a	393647	dus3l
103911115	LOC103911115	103909972	LOC103909972
101883708	LOC101883708	569455	kpnb3
393461	gmds	550338	alad
793871	desi1b	101885540	cenpq
325084	src	393806	snrkb
324340	cyp3c1	110440197	LOC110440197
30677	tpst1	100535969	LOC100535969
100331155	chpfa	325599	lgals3b
336695	samsn1a	334936	trmt2a
561288	grk6	541347	mat2b
561208	tmem41b	394182	plekha3
799686	dock11	406813	tfdp1a
405832	rffl	550453	pdrg1
100004095	si:ch73-90p23.1	108179096	LOC108179096
108179181	LOC108179181	108180725	LOC108180725
393386	cybb	558776	knop1
110438329	LOC110438329	561797	si:ch211-106a19.1
406344	tram2	445391	nop10
110437749	LOC110437749	503993	si:ch1073-358c10.1
100141368	waplb	100317924	mras
794255	c3ar1	321897	gnl3
568558	si:ch211-154o6.2	100334443	LOC100334443
100149630	mcf2l2	791448	qdprb1
553668	galnt7	553571	tp53rk
613193	si:ch211-241j12.4	436593	trmt61a
569518	ankrd33ab	321084	dnmt3ba
794598	LOC794598	30733	rrm2
100536767	znfx1	492479	btg3
140423	jag1b	100005273	scarf1
337690	pikfyve	492647	angptl4
108179059	LOC108179059	791146	e2f3
436850	suclg1	570077	tti1
406202	heg1	567631	tg
393381	fibpa	100009635	dhx37
324052	c1galt1c1	100148281	wdr89
103909809	LOC103909809	30739	tgfbr2b
110439006	LOC110439006	101884144	fgd5b
569128	ccdc80l1	450079	baz2a
324855	plaa	767726	fdx1l
799945	sema3fb	108190761	LOC108190761
556471	sema5ba	559776	zgc:175088
100190951	bcl2l11	566824	unc119a
445177	dnajb1a	317638	igfbp1a
100004890	olfcg5	81882	dhfr
101882195	LOC101882195	321294	cpox
566146	nde1	387290	smox
558154	vegfab	323424	sult1st1
100535918	tgm1l5	450052	acot8
563720	cc2d1b	571106	tfam
100001198	prkaa1	550550	mecr
571887	kirrel3a	406734	agpat3
792554	si:ch211-117l17.5	560495	si:ch211-195d17.2
678522	gpat4	436891	apoa1bp
100333151	cpeb4b	100004175	cdkn1cb
791709	scocb	564855	fbxl3l
563273	npnt	560815	riox1
565213	slc9a5	565231	si:dkey-63j12.4
559124	ppap2d	100334830	kynu
553770	pcyt1ab	386899	mettl26
564545	si:dkey-40c11.1	436866	tnfsf10
393648	rer1	557499	slc8a4b
406776	uba3	560341	mych
550498	iscub	406563	zgc:85936
566905	si:ch211-242b18.1	100151606	tstd2
100005373	greb1l	799016	pop1
378848	hspa5	353224	nrarpa
325484	vamp5	100005761	ehmt1a
567701	gmeb1	100536352	urb1
322614	arg2	553234	ptgr2
100317899	dnah1	317641	zcchc7
562925	atp11a	100537865	prr5b
436629	nus1	407988	rcan2
553087	nisch	767734	ptk6b
58092	smad3a	553523	trit1
334337	ubqln4	767760	slc17a5
393671	cabp5a	406276	s100a10b
100002627	ptafr	541336	zgc:112496
751682	avl9	100334247	vipr1a
559850	neu1	447888	spout1
678527	si:dkey-25e12.3	101882903	arhgef15
567731	fam69b	259255	plagl2
100333333	mgat4c	555364	rarab
110437831	c24h18orf63	447875	smyd5
386590	hsp90b1	568316	prkag2b
436758	mrps15	100329344	LOC100329344
796618	si:dkey-17m8.1	558182	igf2bp1
101883900	LOC101883900	566517	aga
108179086	LOC108179086	570626	stab1
406796	gnb1b	436950	sumo3b
327138	slc26a11	393505	srsf10b
561914	malt1	334306	msto1
555239	mtmr10	560591	atad5a
553778	rab23	792085	ndrg1a
335865	hspa4a	566886	epas1a
100270761	scpp8	751689	cbx3a
555640	fam184a	569118	ddx10
192298	sec61a1	564291	cables2b
560481	hspa13	100537548	si:dkeyp-97a10.1
570782	mfsd11	100320511	si:dkey-187a12.4
553311	p3h3	445488	morc2
560026	dsg2.1	387260	scarb1
553414	rnd1b	795154	immp1l
405802	plscr3b	564151	clspn
110439846	LOC110439846	569096	rufy2
557710	si:ch211-212d10.2	794038	brip1
558833	spag9a	692125	fanca
541367	rca2.1	445182	auh
393972	nck2a	322404	nop53
558139	sele	108186185	LOC108186185
407983	tp53bp2a	767790	pdgfab
568468	fat2	323848	mcmdc2as
393145	tmem38b	117508	klf2a
793952	si:dkey-253i9.4	405828	nup43
405776	glcea	406614	irf2bp2b
553944	ugcg	791775	pdxka
321220	ptbp1b	266992	cad
436908	slc17a9b	334446	heatr1
100002175	nkiras1	110438434	LOC110438434
101882914	ssuh2.1	564713	si:ch211-220f12.1
406428	pdhb	563643	mms19
568368	lipea	393185	trmt11
406280	itih2	323464	lsg1
368331	erlec1	436655	rbm34
559524	ptpn5	564114	si:dkey-58f10.7
564750	pi4k2b	566513	zbtb22a
793098	yme1l1a	654774	dock4b
568556	klhl3	792182	eef2a.1
100101460	hcst	394078	cwc27
327133	hyou1	100149419	si:dkey-69o16.5
619412	nedd4a	564023	si:ch211-210c8.6
567921	osbpl3b	100536039	LOC100536039
503864	rln3a	445069	ntpcr
100334188	tbx3b	571626	sh3gl3a
767810	mhc2dbb	108179023	LOC108179023
557421	cbarpb	567565	trmo
101882648	fat4	415207	rbks
556989	LOC556989	566065	wu:fe02h09
553270	pde5ab	101884764	lpar6b
100333057	tsg101b	100192215	zgc:194469
562784	mxra8a	100330598	si:ch211-160e1.5
564537	shdb	554122	pon3.1
393990	ergic3	447883	zgc:101783
560986	pnpla6	794020	ndufaf5
795897	LOC795897	393436	aqr
550238	lmbrd2a	559746	xirp2a
336876	tollip	553566	zgc:109986
393963	srp54	30196	lmnb2
321129	rtca	550404	gpd1a
569049	cog4	445288	acads
100329499	unc13bb	562455	arhgef12a
555591	si:dkey-261j4.5	553450	LOC553450
561703	rictora	567941	e2f7
100333025	gdpd4a	565088	rpusd2
554091	dnajb9b	286746	sdad1
796219	zcchc14	103908986	LOC103908986
335392	si:ch211-153b23.4	555679	scpp5
369191	tnr	322251	rpl7l1
393247	naalad2	556454	csk
560440	si:ch211-210p4.6	564805	arhgap29a
556523	sh3rf1	447905	entpd2a.1
556641	pld1a	100151129	rab11fip4b
556291	gnpda2	393617	nat10
323713	midn	436958	gpat3
553627	ngly1	100333903	adamtsl4
100003744	abcb10	613021	nol8
101885322	si:ch73-40a2.1	100320658	loxl4
798269	si:dkey-23c22.5	558811	si:dkey-42i9.8
436903	bpgm	561925	ulk4
678540	gale	567938	pik3c2b
619249	snx24	378454	aaas
447842	clpxa	100329955	si:dkey-234i14.6
101884911	dfna5a	406840	sesn3
559942	ogfrl1	101884568	LOC101884568
561462	cyp2k8	794050	ccl38.1
664698	neflb	30747	tek
100093704	smim7	552978	ncapd2
100150882	LOC100150882	563626	tbc1d12a
571155	si:ch211-167b20.8	436798	rpp38
494085	pink1	110437777	LOC110437777
550591	zgc:113208	327057	uck2b
447846	bmpr1ab	558034	xpr1b
565702	cnnm2b	436926	serpinb1
100005496	si:ch211-1i11.3	562329	polr3b
100535085	si:ch211-256a21.4	567512	tspan33b
562538	dph2	436717	decr1
568768	si:ch211-26b3.4	114466	tnfsf10l
503702	prnprs3	791187	srpk1b
393932	slc15a4	503783	metap1
793362	b3gnt2b	555704	mdn1
558499	chka	406255	fancl
100005529	dnal4b	559012	tgm2l
406624	ggh	30659	dnmt3bb.2
570867	srgn	494063	zgc:103499
751635	alg5	553237	zranb3
553465	sik1	321564	eif2s1b
494077	tsta3	406852	nup133
566761	edaradd	100000478	mgat2
492523	def8	100002463	pprc1
140815	cebpa	394081	bysl
799963	gpt2	492512	ftsj1
550330	prrg4	393308	riox2
558758	acp6	556208	akap1b
561653	vps45	393424	dnajc24
568893	fam46bb	431720	nr4a1
558725	syt16	553326	hacd1
100004688	col27a1a	561626	si:ch211-225b11.4
550552	atg16l1	100144628	shmt2
555604	nox1	554157	ctss2.1
570216	itgb1b	445392	fbxo5
560592	myo15aa	100136856	vetz
100037338	inpp5ka	407981	epb41l3b
556535	setd1a	559344	zgc:195081
492497	stam2	101884549	LOC101884549
777734	zdhhc15b	541405	pex7
559035	shroom4	568713	dse
100149102	lysmd4	558828	dcaf17
101882843	LOC101882843	334195	mat1a
100003989	csrnp2	100535806	LOC100535806
556725	fam131bb	393520	pno1
100148088	enthd2	100000101	kazald3
768121	foxo1a	550496	snx30
100038797	rhcga	393260	nol12
100307075	wsb2	556951	zgc:172352
403116	st6gal2a	796312	slc5a6b
100536675	tyk2	555630	si:dkeyp-33b5.4
492489	sgut1	368435	p2ry4
571114	efhd2	566836	si:ch211-63o20.7
567691	si:ch211-251p5.5	100535600	themis2
568165	si:ch211-278j3.3	550532	poli
571430	si:ch211-183d21.1	664699	as3mt
335008	pla2g15	735312	abcg2a
323929	mtmr14	767755	zgc:154061
544651	kif7	406326	cstf3
566491	bcl11ab	492509	pcid2
393410	gpsm2	550263	polr2h
101884799	LOC101884799	101884102	si:ch1073-147h9.1
572300	si:dkey-22i16.7	100538326	myom2b
102997062	il1fma	100329707	farp1
566493	abhd5a	335449	serbp1a
402897	rbm48	568719	znf800a
724080	b4galt5	327538	ccdc82
503514	angptl2b	406358	hacl1
393789	hdac9b	751629	setd8a
30585	dlx3b	386932	poc1b
559276	ahnak	550246	ankrd49
327447	nploc4	792002	rhbdl2
570584	moxd1	393264	uap1l1
334010	il11ra	393173	rpap3
100148154	agap1	550332	dctd
100126017	gpr84	360142	mxa
100330352	si:ch73-361p23.3	100002528	gemin6
393142	ccdc53	100002283	LOC100002283
560546	slc2a10	101884837	wdr70
323839	scyl3	445101	rpusd4
553792	fpgt	559540	bmb
567919	sik2b	767802	tfb1m
445495	tmem144a	562393	mctp2a
103909161	LOC103909161	436951	timm10
436790	arl6ip5b	492795	dia1a
431772	sgtb	492460	trmt10c
553685	cyb5r4	100331939	ephx4
566708	flt3	100534988	si:dkey-164n2.1
100003066	ndufa4l2a	110438794	LOC110438794
436856	faima	550241	rrp7a
556282	slc46a3	323406	krcp
101885596	hck	568129	si:dkey-56i24.1
100002007	oaz2a	407679	topbp1
561460	zgc:172302	322348	setd6
553575	gsr	799566	eif4ebp1
110437890	LOC110437890	692304	dek
393202	hif1ab	445203	mnd1
449995	atl3	553083	rbbp9
100006778	il6st	100004321	LOC100004321
334269	myom2a	450081	rad51c
100000883	rpz6	791686	cdh30
568308	si:ch211-195b11.7	556036	zgc:154055
30223	efna5b	571588	tec
558615	si:ch211-223m11.2	436849	hrsp12
30194	alcama	101910198	akt1
101884613	LOC101884613	402963	zgc:77398
563463	pbxip1a	567594	c24h7orf50
566269	zbtb10	569706	phkb
567306	napaa	558964	sec14l8
497505	acana	557935	zmp:0000001082
497596	faf2	103909420	LOC103909420
386709	dnajb11	334110	tmem39b
110437708	LOC110437708	100148360	gatd1
100538279	LOC100538279	101886124	LOC101886124
406799	sdr16c5b	100151196	LOC100151196
100005035	si:ch73-27e22.7	565387	tmem104
335654	camk1ga	558400	si:ch211-51h9.7
553407	sec24d	100151491	wipf1b
492364	cbl	431763	gadd45ab
100137128	hbl4	30452	etv5b
393425	elovl5	100535743	LOC100535743
563890	dip2ca	378726	csrp1a
100151365	si:dkey-1h24.6	445199	cks1b
100332173	LOC100332173	553396	mcm10
569664	si:ch211-276c2.2	550607	itfg2
560911	fam114a1	791143	rabep2
450028	dram1	562517	anln
568162	kmt2cb	404732	chst14
568972	apoc2	560627	LOC560627
317746	suclg2	101885962	LOC101885962
556432	si:ch211-238n5.4	406567	fggy
373882	mmp14a	100329327	rfwd3
570822	pam	796025	zgc:162544
407978	cdh23	559103	inpp5d
557072	card11	436918	eci2
503934	psmd11a	110439813	LOC110439813
393179	pdap1b	321058	wdr3
561303	si:ch73-41h24.1	555472	cnnm2a
321943	ube2l3b	321726	rbbp4
570678	glyctk	571548	zgc:174906
558134	tmem222b	492803	zgc:101640
101885973	si:dkeyp-122d12.1	402804	bphl
564367	si:ch211-233a24.2	101883376	LOC101883376
100330031	itchb	678627	zgc:136439
100332191	LOC100332191	101884591	LOC101884591
326745	arhgap21b	406590	ak4
567907	olfml2bb	558306	scrn2
554469	si:dkey-187j14.1	565144	cenpk
335025	atp6v1g1	324845	nt5c2a
327588	hpx	393349	mis12
110437760	LOC110437760	406555	hnrnpul1
791142	sacm1lb	799538	gemin5
554985	gdi1	110437884	LOC110437884
373129	kdelr2a	563396	cbx5
556459	fgd6	110438257	LOC110438257
569466	dnajb5	569398	dagla
101882279	si:dkey-11d18.2	561004	si:dkey-260c8.8
561494	il17ra1a	110437975	LOC110437975
565155	hsp90aa1.2	565190	si:ch211-253h3.1
100149858	samd4a	793926	tkfc
550233	ca8	447891	sc5d
559305	b4galnt4b	100005026	rilp
100005054	lacc1	402863	gtpbp1l
560606	lmln	393981	ttc4
556984	tnmd	563220	si:ch211-239e6.4
555717	m17	541402	asrgl1
567241	lepr	571256	wasa
494034	fbxo44	100535437	ano6
323020	cers5	110439789	LOC110439789
406601	stap2b	393630	thyn1
436688	vps26bl	100005596	si:dkeyp-115e12.6
550609	rpz4	436967	prcp
393265	yipf5	333999	porcnl
100003745	sgpp1	560787	klf11a
394108	stk10	493614	bcas2
100333040	si:ch1073-165f9.2	641475	clybl
101885945	LOC101885945	407613	rbfox1l
100003476	fam117bb	793981	rnf13
557456	trpc5a	108182824	si:dkey-66i24.9
568603	fam13b	445494	pgls
572204	nradd	561970	adgrg6
110439976	LOC110439976	100151439	rttn
100333043	tap1	558931	arap3
558677	zp3a.2	103909543	LOC103909543
101883751	LOC101883751	103910015	LOC103910015
793922	fam222a	100034589	si:ch211-51a19.5
103909274	LOC103909274	550529	gm2a
556026	si:ch211-286b5.4	100318080	tfap4
791152	them4	323016	exosc8
100319064	si:ch211-264f5.6	793727	gnl2
100320176	si:ch73-343l4.8	110439311	LOC110439311
550393	praf2	324573	ogfod1
334561	acsl4b	30163	tapbp.1
415178	tmem8c	561938	thumpd3
321836	krit1	317763	ttk
325361	chp1	57923	pycard
100334794	plpp4	796322	slc3a2a
368645	tmem267	568155	bnip4
565254	pkdccb	100005680	nab2
324307	atp6v0a1a	406268	riok1
794489	si:dkey-31e10.1	100037336	rfc1
560193	il34	556571	primpol
324710	ubl3a	100534898	mtbp
337767	lamb2	793623	sh3kbp1
565793	mmp11b	403080	dnajc2
100135062	csf2rb	445251	carm1
100333227	LOC100333227	558950	grasp
568519	si:dkeyp-50b9.1	403146	akt2l
567041	mia3	394079	atxn3
553264	zgc:158564	569695	znf366
562912	ltbp3	492463	neil3
100005466	si:dkey-34m19.3	796680	prepl
406440	prkag1	327369	si:ch73-389k6.1
405823	cacybp	572007	cdca7b
751733	dcakd	793906	pex1
114464	sec22ba	799199	si:ch211-283g2.2
110437746	LOC110437746	566303	si:dkey-85a20.4
557526	traf2b	553328	hells
100149082	dvl3	393206	nol10
564571	megf10	407086	junba
436692	entpd4	569908	elmsan1a
100126028	fam177a1	406682	znf330
555385	siae	492719	me3
406720	golga5	565862	colgalt1
558696	smcr8a	562064	camk2b1
100006442	slc25a47b	562258	rorcb
323994	pigc	562608	poc5
100149852	kpna6	324906	wu:fc47e11
100536987	kiaa0040	393953	prkcbb
321315	calr3b	394031	mxd3
798402	rhbdf1a	494108	ptgr1
406704	spg21	100537139	si:zfos-1451h6.1
100150665	slc6a14	556104	arpc5lb
405785	tnfa	558761	LOC558761
767700	ero1b	323052	zgc:165515
394177	phc2b	101886666	pik3r6b
100331104	si:ch211-193e13.5	393359	ccdc25
554093	derl2	572562	gins4
567774	ergic1	336303	ppdpfb
108183452	LOC108183452	415098	top1mt
394164	edem1	393123	sepsecs
100537904	mcidas	692331	abi2b
114428	arf1	394099	arrb2b
445156	tm9sf1	406384	gmfb
562156	si:ch211-51a6.2	406321	srfbp1
436594	slc30a5	192332	smc4
751725	hspa12a	101884314	LOC101884314
555467	specc1lb	101883361	LOC101883361
100333060	pitpnab	100329328	zmp:0000001236
562939	si:ch211-282j22.3	100005927	LOC100005927
394067	ykt6	678635	parpbp
415137	sra1	100150998	focad
541494	sept9b	393749	tfdp1b
406537	slc13a2	100034610	adat2
794117	LOC794117	565611	zgc:172090
567385	vti1a	562585	itpr2
793246	si:ch211-132p1.3	393475	prmt7
324015	ube2d1b	724051	nr2c2ap
100142634	sc:d156	571410	LOC571410
574425	zgc:114041	100331484	LOC100331484
565211	vwa11	450034	cdkn2aipnl
322425	map1lc3b	334032	smarca2
317732	scfd1	100009640	mto1
321898	psmd12	503536	rbbp8
353154	sp5a	767714	ncl
100148468	f2rl2	565276	pms2
563257	lonp1	557797	itgb2
324569	gosr2	327599	chp2
793210	slc16a13	393667	btf3l4
565852	vps11	793912	nefla
558860	sh2d3ca	403053	nfu1
564246	zyx	799015	dbf4
567635	tmem130	550370	nudt12
565863	si:ch211-278a6.1	110440201	LOC110440201
100006475	zgc:171500	445290	acat1
567861	gfpt1	572540	blm
556823	cylda	563855	chac1
492798	slc37a1	110439817	LOC110439817
407722	gpn2	103909811	LOC103909811
327299	zgc:66160	561810	dnph1
678603	st14a	110438217	LOC110438217
246090	cygb1	494496	zgc:86609
402992	scamp1	403133	tlr18
100320289	adamts13	101884921	LOC101884921
101885079	si:ch73-248e21.5	101882779	si:cabz01074944.1
767670	vps4a	568757	nt5dc1
557240	ggcx	474329	c1d
110440218	LOC110440218	794759	snx20
560602	slc2a6	566771	itgb1b.1
558007	gltpa	797211	ugt2a6
550396	mppe1	100005261	jam2a
562028	zcchc24	100002916	dsn1
101887125	ptx3a	568410	zgc:194990
492492	cope	393978	ubtfl
100148976	adcy8	767704	zgc:153118
795066	LOC795066	101884216	LOC101884216
30248	calr3a	565342	adam19a
100333859	si:dkey-162h11.3	394047	rtn3
431725	zgc:91909	336984	dnajc21
556077	plod3	557908	mettl13
567544	slc6a8	445497	zgc:101016
557258	ptk2ba	110438004	LOC110438004
394006	stoml2	101885083	LOC101885083
554998	pdia4	541357	npm3
492473	scamp3	560645	gdpd5b
327268	sec23b	405811	irf5
445127	hsd17b14	799384	si:dkey-250k15.4
195824	atp6ap1b	100536997	mterf1
793710	aplnr2	449779	mettl1
560915	rfk	570159	kcnk5a
567341	fam167ab	100333951	itgae.1
30556	tcf7l1b	497646	gadd45bb
406853	creb3l3l	386705	ptk2aa
553182	crybb2	570622	gbp2
799466	lrrc29	550475	ctsk
406270	acbd3	321714	setb
406651	ddc	777625	znf362a
553310	elmo3	553293	pbxip1b
555775	ginm1	560620	hemk1
566003	si:ch211-89p3.3	567359	cenph
403138	tlr5a	558857	exosc1
100330405	tmem176l.1	555570	chtf8
568029	exoc8	777617	pgghg
110438030	LOC110438030	317747	rock2a
415186	yipf6	492761	tbl3
100537455	LOC100537455	360218	pbk
100005569	zgc:194839	494040	cd2ap
100007100	LOC100007100	394119	rad54l
574424	rab25b	564111	mcat
559775	lman1	566980	tasp1
555174	wash1	445204	nutf2l
678614	elovl2	108183588	LOC108183588
566671	orai1a	797143	mbd1a
415181	psmc1b	100034470	tapbp.2
550287	psmd4b	767665	galnt10
101886133	LOC101886133	793910	msra
402879	LOC402879	561195	trpv1
553612	mpeg1.2	393305	hyi
30509	oprd1a	768161	orc2
564334	tspan37	64674	mibp
101887140	tbc1d10c	393149	rmi1
568910	parp8	334278	arhgef10
101887189	LOC101887189	571922	sla1
556148	prickle1b	322229	adkb
359835	timp2a	100003383	pmvk
558045	parp4	325179	inppl1a
324681	rhogc	100149557	nsun6
560360	pip4k2aa	327196	tex10
557383	bicd2	550469	zgc:112433
100002812	phospho1	100535107	si:ch73-234b20.4
445493	bet1l	100005455	mettl20
751628	gpd2	101886869	si:ch211-252f13.5
793785	rab6a	259304	twsg1b
492587	si:dkeyp-87d8.8	565235	aldh5a1
103911833	LOC103911833	393510	slc2a12
735249	vimp	796865	gamt
553761	arhgef3l	100003313	llph
100538255	LOC100538255	393243	znhit3
553511	tmeff1b	565335	slc25a15b
558469	nt5dc3	550504	ssbp1
447869	tmod2	100332647	si:ch211-198m17.1
30650	pth2r	30079	btg2
436746	arl1	100000334	si:dkey-16n15.3
450031	tmem189	556689	si:dkey-217d24.6
100004990	aftphb	567610	si:dkey-262k9.4
100330881	zgc:171572	100004144	zfyve21
767772	samd13	553292	setdb1a
798089	LOC798089	555586	ftsj2
393456	mvb12a	360134	ifnphi1
100003333	lrch4	100003699	aste1b
767727	zgc:154045	327175	larp1
445240	fnbp1l	393338	abhd14b
393263	ddrgk1	100000709	whsc1
678518	baiap2a	393187	atp5s
394060	hmgcs1	108179657	LOC108179657
406689	mcoln1a	541346	hdhd2
100005161	si:ch73-27e22.1	445148	zgc:100832
368671	homeza	571485	tdp1
550363	ms4a17a.11	100003708	si:ch211-226m16.2
558856	sec22c	103909416	LOC103909416
327330	psmd7	449926	iah1
553082	klf7b	563794	iffo1b
503594	il4r.1	561061	zmiz1a
555459	otud5a	101885420	e2f1
266637	apmap	555969	lpcat1
373084	higd1a	556389	fxn
561005	sipa1l3	555267	mmachc
797291	zbtb5	553574	pin4
572463	ibtk	550348	prmt3
449791	ap3s1	103909945	LOC103909945
100150342	ftr97	30190	egr2b
768247	cog7	777635	plod1a
569680	ppp4r1l	110439026	LOC110439026
322921	wu:fb77a09	110438017	LOC110438017
101882577	si:ch211-13f8.1	560412	smarcal1
557996	dnm3a	108182779	LOC108182779
101884459	arhgap39	565000	exosc3
406508	usp33	677742	lgals3bpa
406621	chmp3	550350	mrto4
368412	atad1b	793364	fgd4b
101884588	zmp:0000000937	798352	anapc10
335842	tsc22d1	323563	bnip3la
100331351	il1rap	561567	srgap3
447895	gpx1b	436932	rnaseh1
565632	btbd16	406353	cdc20
100331333	itga4	566923	haus3
557223	si:ch211-1a19.3	692276	zgc:136493
110440219	LOC110440219	447876	pqlc3
101882351	LOC101882351	569275	ngrn
107195253	LOC107195253	553568	abt1
368213	glo1	550401	hcfc2
570052	ppp1r18	368320	gmnn
563578	tbc1d9	565838	adrb2a
791156	slc25a15a	794079	pdcd11
678565	zgc:136791	568418	si:dkeyp-55f12.3
110439840	LOC110439840	555610	mcm9
406680	tmem161b	436807	nop16
436739	brap	335839	cnbpb
100535513	crfb15	100150035	ptk7b
100005887	vps18	445173	surf2
566822	frya	565971	etnk1
563352	kcnn1a	325248	ddx31
568267	kctd17	326734	tlk1b
798433	syt9a	405809	lgals3bpb
110439376	LOC110439376	110439470	LOC110439470
394115	ranbp3a	558214	slc12a7a
567119	fem1b	100005939	spryd4
565444	tmem131l	562348	supt16h
406409	cyb5a	335722	dfna5b
768136	nedd9	556121	sfxn4
777721	wdsub1	796750	si:dkey-15f17.8
100536710	tmem220	100003132	bpifcl
678549	fbxo8	566384	tmem59
795752	arhgap5	553275	mtdhb
100320445	ostm1	405873	mycla
404620	cdipt	798757	znf438
692325	flj11011l	555292	zgc:162396
504036	ly75	503936	pnpla7b
566084	si:ch211-91p5.3	103910135	pigrl3.9
569227	slc25a25b	566443	fxyd6l
553433	pisd	494071	irf2
550411	yod1	100317638	si:dkey-29d5.1
326701	ssr4	567001	rif1
445309	fam199x	327248	zmym4
799942	pde9a	110439541	LOC110439541
563067	hps1	100004270	wdr6
791754	si:ch211-219a4.3	556934	tspan4b
570984	prex1	768153	tmem106c
557483	osbpl2a	550440	cebpz
393925	pdcd6	791973	cxcr3.2
323260	gas8	110439948	LOC110439948
798864	pla2g4f.1	568178	si:ch211-102c2.4
797317	rhbdd3	567624	si:ch211-221j21.3
393404	fbxo30b	100003205	trmt61b
569719	nagpa	110439727	LOC110439727
799852	si:ch211-219a4.6	641421	tubb2b
493601	pcdh2aa15	327464	si:ch211-210g13.5
497149	si:rp71-1p14.7	553389	haus1
550414	zgc:112175	101882826	LOC101882826
393604	srfb	286776	ints7
322121	abhd17aa	404619	n6amt2
556734	itgb1a	393842	tagapa
266757	tram1	65237	mapk14a
550428	cacng8a	100136859	fbxw8
100330433	txndc11	791612	mat2ab
405887	nf2b	404606	pithd1
566903	gpr132b	450057	exosc9
565516	crtac1b	558278	etaa1
110437935	LOC110437935	767799	zgc:153169
101885280	LOC101885280	368241	egr2a
568473	l3mbtl2	571260	zgc:162816
572502	wdr7	449674	park7
573095	psmb3	393241	rnaseh2b
557149	si:ch211-244b2.1	566954	terf1
252850	thbs4b	560139	limd2
557714	pparab	541508	zgc:113340
170455	meis1a	100535315	LOC100535315
553993	zgc:112977	402852	pane1
795670	llgl2	110439347	LOC110439347
568022	serac1	568666	atp13a2
393352	snx15	751764	bmf2
562648	LOC562648	792547	zgc:174890
403014	ncf4	393426	ptpn11b
558330	tapt1a	108180286	LOC108180286
336339	sys1	393573	palm1b
565708	mhc1zea	558635	rapgef1a
324005	dnajb12a	559050	sgk2b
100038786	fam160b1	567862	spata20
324201	dlat	335049	ebna1bp2
30647	psme2	100332626	LOC100332626
100534928	slc35d2	140744	ckbb
557070	cavin1a	323266	cd99l2
103911019	LOC103911019	100007963	si:ch211-236g6.1
555505	phf14	100149957	xkr8.2
393094	emc9	436643	tsr3
100002220	enox1	450083	gla
442869	trim24	541429	aoc2
566242	slc41a2b	799204	zmp:0000000936
100002263	pik3cb	541523	eif4e2
566313	ramp2	553689	rprma
497306	sorl1	393787	pcbd1
793897	psme4a	103910040	LOC103910040
100033386	irge4	407710	xpo7
561549	emc7	415134	mafga
568320	bcr	572367	bud23
557680	plpp3	393107	utp6
323361	tomm34	503749	mettl10
321460	ist1	541352	rpp30
791169	creb3l2	100536832	si:dkeyp-123h10.2
322509	acta2	723996	tnfaip8l2a
368703	si:busm1-104n07.3	406721	rad51b
101886078	LOC101886078	336439	zwilch
751692	rnaseka	393446	ralgps2
100034519	btbd11b	562197	si:ch211-225g23.1
567442	kcnh4b	567383	recql4
101886607	LOC101886607	336147	abcc5
445149	zgc:100829	445394	wdr55
100137114	ftr50	562658	zgc:152863
100538338	LOC100538338	100003329	cacng8b
557783	si:ch211-195b15.7	572258	polr3a
324309	fstl1b	100005341	wipf1a
558359	mllt4a	101885587	LOC101885587
393854	dusp8a	447863	bin1b
100001853	nrip1b	568156	larp1b
569090	ngef	569034	pacs1a
566323	qdpra	100126120	zgc:173726
30666	psmb8a	393933	cdc34a
103910147	LOC103910147	393417	capn1a
368229	pmm2	557902	adcy2b
100538116	gabra3	192295	ccna2
100332309	clpxb	447867	slc25a24
100148891	si:ch211-269m15.3	436778	sub1b
100000629	si:ch211-136m16.8	335057	znf462
795160	ccser1	100330789	si:cabz01113374.3
798995	tbc1d23	445096	dus4l
569063	srpr	796749	si:ch73-54n14.2
406747	sass6	552994	im:6904045
101887157	LOC101887157	100003994	zgc:162198
335226	syvn1	101883279	si:ch211-69l10.2
321250	zgc:66433	100002675	si:ch211-125e6.8
557132	sash1a	798168	LOC798168
556156	slc5a8l	100005953	mipep
322327	apoa2	110438268	LOC110438268
334108	kif5bb	557037	pparg
777609	ggact.1	103908695	fbxo48
566604	casp3b	494076	dhtkd1
324407	chsy1	30498	egr1
336798	ggps1	557571	znf652
108179942	LOC108179942	407709	si:dkeyp-113d7.1
558213	rc3h1b	100004124	gpr1
100310882	gpha2	406487	rad51
797357	cd44a	393350	xylb
570454	thrap3a	100003562	ecd
561007	pdk4	450077	dera
407615	spryd7a	565911	mylipb
100498669	rxfp1	559531	mxd4
564685	nab1b	562076	tyw1
100333821	tnfrsf11a	100093703	mrpl36
336567	ftr67	567547	mthfr
406444	bcl7ba	100170804	rfxank
557021	nub1	327284	lgals9l3
794689	zfyve16	554366	chtf18
436875	zdhhc7	324947	sephs1
100331260	LOC100331260	393280	nuf2
492334	slc5a11	393104	saal1
791470	b3gnt5b	561237	si:dkey-183c2.4
101887022	LOC101887022	558662	xpo5
567287	rnf217	503758	slc25a32b
103909306	LOC103909306	100332843	mthfs
564915	gnaz	100150924	polg
565615	si:ch211-85n16.4	100333146	LOC100333146
555766	etv2	555279	tmem209
555453	si:dkey-261j4.3	100001532	plcb3
333974	gclm	393370	pdcd2
334982	yif1a	568655	pon3.2
100331395	si:ch73-390b10.2	449553	impact
100007322	ptpn23a	568153	fpr1
447864	ass1	567870	cfdp1
100148772	ap5b1	563195	rrp12
445184	lpar2a	324560	cyb5r3
100538283	LOC100538283	100037342	acadsb
560003	erc1b	768141	mtfr2
565104	lifrb	563580	slc29a1a
494043	slc9a8	327078	polr1a
402802	pla2g12a	378446	dhcr7
30560	fgf6a	436895	irf8
393527	pdcd10a	393659	mtfp1
445255	ralba	561360	si:dkey-27o4.1
387592	slc13a1	568041	sall3b
110438377	LOC110438377	568653	btk
641490	arfgap2	368856	cenpn
100005501	si:dkeyp-67a8.2	100334463	plekho2
325317	calr	550325	naa40
403013	irf9	403007	zgc:76872
563356	slc5a6a	436698	haus4
562018	sh3pxd2aa	368827	asnsd1
553431	camkvl	317745	impdh2
558942	colec12	108190717	LOC108190717
567688	si:ch211-262i1.3	566484	scaf11
393464	tmem68	553804	mcee
568554	kcnma1a	550351	zgc:112492
100415797	ugt5a5	393493	gstt2
794293	tead3b	326718	esf1
767649	saraf	445136	rpp21
793867	zgc:174945	555606	bora
432390	ift81	793011	rxrab
561894	nckap1	553306	evi5b
378958	dmxl2	101885347	LOC101885347
101884350	LOC101884350	541317	gatb
101885476	pld4	327176	pcmtd1
100005174	dnmbp	560253	atpaf2
110438320	LOC110438320	565979	fam120a
564346	si:ch211-214b16.3	100334658	si:ch73-160h15.3
566597	ppfia2	436888	mterf3
100148554	si:dkeyp-9d4.2	436610	pnpla3
569920	LOC569920	101886447	LOC101886447
554140	atg4a	100149925	eif2ak4
570275	phldb1b	336746	zgc:63831
751713	gtf2h5	445165	fuca1.2
562194	dapk3	30228	pes
436689	epdr1	100332351	LOC100332351
558638	zgc:162200	556702	yars2
108191007	LOC108191007	100150674	polg2
110438410	LOC110438410	560140	adipor2
571031	arhgef12b	541506	zgc:113227
497644	pomgnt2	570350	si:ch73-109i22.2
407620	yes1	541326	zgc:112185
559811	edem3	266985	npm1a
100003446	sept4b	100136875	kif2c
445049	zgc:92137	436808	rwdd1
571446	LOC571446	567037	thap4
393184	clec16a	794365	si:dkey-163m14.7
550585	ppp2ca	563225	gtpbp6
562893	btbd11a	110440113	LOC110440113
100330669	r3hdm2	664752	myg1
569044	zgc:161969	550507	bdh2
553604	klhl36	553720	alkbh1
402936	fancg	555238	pcgf6
563884	tgfb1b	415208	zgc:86811
554131	tex261	101883732	gas5
110438576	LOC110438576	335916	jun
100333695	si:zfos-364h11.1	560788	parp1
798009	errfi1a	110438090	LOC110438090
100535378	si:ch73-269m14.2	100332911	gpam
449825	zgc:101560	100000326	gpn3
569741	creld1	541526	camkk1a
110439576	LOC110439576	100033387	nefmb
393483	tmem150ab	335907	anp32a
564348	lepb	550502	adss
563105	plcl1	541404	cdc42ep2
568039	ttc7b	751672	arl14ep
799740	si:dkey-3h2.3	404601	pacsin2
559101	enc1	568436	si:busm1-71b9.3
245698	flot2a	568500	galnt8a.2
100000526	sec24a	266756	mapk14b
559783	si:ch211-207n23.2	100329471	nudt7
556668	LOC556668	474321	pgm3
553179	kitlga	449558	zgc:101723
558606	luzp1	767705	ugt2a5
326722	si:ch1073-159d7.13	324754	gemin4
558239	si:ch211-113j14.1	360146	mxd
568338	slc5a3b	100037308	fam26e.1
556864	ube3b	336149	utp11l
796461	nrg1	541441	mettl21a
558772	nfe2l1b	100334602	si:ch211-108c17.2
323870	clint1a	767786	rpusd1
437024	ikbke	101886409	si:dkey-76b14.2
767756	ugt5a2	797943	ppp1r15a
777637	otud7b	437005	znf106a
406347	slc35e1	368818	klhl6
195821	mtf1	101882208	LOC101882208
555681	frem2a	403049	vegfc
334648	ficd	101882983	lrfn4a
565059	pank1b	368360	lbr
799189	klhdc8b	751763	bbc3
573655	rhof	415191	tnni1al
100002272	dusp22b	557155	tubgcp4
110437953	LOC110437953	110437989	LOC110437989
110438003	LOC110438003	101884935	si:ch1073-59l16.1
562728	si:dkey-40m6.8	494155	serpinb1l1
321166	apobb.1	100322133	mertka
108180799	LOC108180799	792527	inpp4ab
793349	pi4kab	101886015	LOC101886015
110438406	LOC110438406	565077	znf827
436664	zgc:92040	799070	zgc:194224
553406	kdm5c	556186	nt5dc2
550560	entpd6	100535571	xkr8.1
553448	rrbp1a	335032	rapgef6
798901	bc2	100005742	si:ch1073-296i8.2
561411	yap1	327096	hlx1
323154	col13a1	114444	etv6
101882166	LOC101882166	100537622	si:ch73-56d11.3
795685	qpct	664693	zgc:136870
100333913	LOC100333913	393650	irf7
110438850	LOC110438850	322209	jade3
110438777	LOC110438777	100137116	zgc:172014
100003770	mylk5	568283	larp4ab
791704	zgc:153759	30724	melk
100148577	tnfsf18	393398	ctss1
108190653	LOC108190653	100001169	si:dkey-57h18.1
101885675	LOC101885675	565873	cep152
100537549	LOC100537549	100536119	LOC100536119
393321	ero1a	393095	mocs3
567970	setd1ba	570613	sord
325402	atp6v0cb	100002182	si:ch73-281k2.5
100329885	LOC100329885	554488	ypel1
560750	sec23ip	570477	prdx4
100321503	si:dkey-83k24.5	791170	nol4lb
30619	fli1a	402932	ino80e
450076	arl6ip5a	245699	insra
101884896	LOC101884896	327167	mynn
558474	lemd3	436898	supt3h
445091	zgc:92480	436775	n6amt1
445202	dpm1	407736	fabp7b
558876	LOC558876	563942	kat2b
557850	trpv4	445090	caprin1a
768194	pick1	767694	slc25a21
110439638	LOC110439638	100333644	clcn2b
406504	marcksl1b	557745	pea15
791915	enpp6	116992	smad6a
373115	dnaja	100034425	si:dkey-102c8.2
541525	smpdl3a	322007	usp1
541479	hmgcrb	550259	pfklb
562630	LOC562630	555812	ucp2
100149283	znf710b	100005587	aldh9a1a.1
100037381	ccdc187	393721	pin1
724005	grinaa	560887	mib2
557006	si:ch73-248e21.1	566022	fdxacb1
560222	trmt10a	450030	chchd4b
334206	osbpl2b	415188	tmem19
641570	impad1	447815	rimkla
555802	nfat5b	555714	rad51ap1
100192216	zgc:195175	100003763	si:ch211-59d17.3
100334608	oscp1b	101883776	LOC101883776
556199	phka2	321240	armc1l
561686	dnajb2	266798	ap3m1
568835	slc27a6	373092	glud1b
553594	ctns	562678	ncaph2
678610	map4k2	30275	inhbb
386762	apc	407621	disc1
550403	gad2	619261	b3gntl1
110440181	LOC110440181	108183364	LOC108183364
570807	phldb2a	492768	cdc7
557972	nt5c2b	100329719	slc9a3r1b
768170	dpp9	58013	noc2l
568037	LOC568037	794624	si:ch73-215d9.1
793359	camk2g2	664689	plagx
368326	il13ra2	100332714	stra13
322756	ufm1	322977	mid1ip1l
100534752	slc16a1a	415249	trnt1
553554	rnft2	368634	adat3
751700	tspan14	327494	zgc:66472
553346	psme4b	553294	ube3d
100537419	plekha1b	571836	tmem56a
569543	epg5	100037390	cyp4f3
110437818	LOC110437818	393463	tbc1d19
436693	gapvd1	553799	mrpl30
548339	zgc:113364	100302659	cenpa
100000736	tmem176l.2	326866	actr8
100330293	gpr35.2	553610	pole4
560541	narfl	108179599	LOC108179599
100003587	herc3	567006	bub1bb
393186	zgc:56235	553516	tdp2b
108179355	LOC108179355	503530	mtrf1
571403	znf395a	793111	setd9
100148025	si:dkey-119m17.2	561124	ssna1
323107	pgam1a	450010	rdh14a
664696	tigara	431718	hdac11
57957	slc7a6	406695	cdc45
266638	sec31a	559362	si:ch211-266k8.4
554386	cldnd1b	393651	grap2b
556885	klhl25	797380	gpr132a
541435	acss1	386723	fli1b
100332120	tmem164	564925	trmt12
100150581	mfsd9	110438939	LOC110438939
562336	clcn5a	793726	zgc:194285
550364	unc45a	110439729	donson
101884302	LOC101884302	436588	polr2d
565612	ep300b	569937	ckap2l
101884909	LOC101884909	100001584	adck5
100000168	si:dkey-16l2.20	103909638	si:ch73-304f21.1
100134935	csf3r	555828	pusl1
65234	cdk5	450000	amt
791738	selk	406615	gpd1c
406774	sec23a	324413	bhlhe40
569051	serpinb14	793465	ece2b
568838	slka	326058	scrn3
564232	retreg2	394154	sars2
795019	stk11ip	103911968	LOC103911968
560068	pdk3a	564994	rbms1a
100333321	prodha	555997	si:ch211-284b7.3
436754	gstz1	641484	hmgb2a
394134	mpp6b	557721	slc45a4
560194	gsk3aa	100148757	si:ch73-204p21.2
572323	si:ch211-160o17.4	394044	uvrag
558396	cyp27c1	557834	itpa
406696	pgk1	100005689	LOC100005689
393954	znf143b	100126022	cenpo
559072	gba	554147	spc24
110438863	LOC110438863	322331	ephx5
100001029	rpz3	393848	arhgap12b
386589	hopx	324822	actr6
557061	igf2r	321796	wrap53
336797	serp1	571242	malt3
492643	gga3	394072	foxm1
555848	cpdb	323672	naa15a
445187	trim101	100150980	mtg1
101885883	arhgap31	795391	si:dkey-183i3.6
58154	dnajc3b	641427	exo5
568454	ablim2	405877	mafgb
561815	opn3	561618	slc4a4b
492617	isoc2	553318	gtf3c3
550131	morn4	794765	si:dkey-222h21.1
567942	glt8d2	100537348	si:ch211-114l13.12
353222	gnrh2	108191614	LOC108191614
100535428	LOC100535428	324574	wu:fc33b09
322581	trabd	100151110	oplah
447906	kifap3a	558570	cenpi
568879	rnf34b	447901	polr3gla
797527	crfb4	558390	si:dkey-16p21.7
569779	myo10	555797	cdkn2c
100137103	zgc:171426	334665	rdh14b
57936	tbx20	794664	acd
406841	tmem184a	492797	haus5
393591	zgc:63733	798466	tmem196
101882313	LOC101882313	558162	rmdn1
553365	gnptab	393580	bco1l
378980	tmco1	404617	zgc:77287
561893	cmip	404623	uprt
566630	si:ch211-186e20.7	677660	retsatl
570876	gabrr3a	497165	nek6
570229	si:ch211-250k18.8	563134	tbc1d31
445196	arf4a	436652	entpd8
324140	sgk1	562805	klf8
100124530	ctgfb	445411	ticrr
336461	zfand6	334334	ivns1abpb
393351	chmp5b	567088	heca
100006680	si:dkey-187j14.6	327292	tpte
403019	irx1a	402815	nr1d2a
796761	si:dkey-92f12.2	777638	ctc1
559603	qsox2	108190699	LOC108190699
566106	dis3l2	573998	dusp12
101885536	LOC101885536	796803	polr2k
553276	rsu1	140613	her9
108004534	hhla2a.2	110439915	LOC110439915
570683	cacna1sa	561030	pdxp
564554	lrig3	796987	dpy19l3
393782	dpm3	321247	ftsj3
100333185	LOC100333185	336610	ywhaz
436605	stx5a	323490	ptbp1a
568486	LOC568486	559281	irs1
474331	dolpp1	100005064	tsen15
30767	stat3	449836	fra10ac1
793341	slc12a9	553803	tmem41aa
100332108	LOC100332108	437013	eef2k
565822	bnip1a	564211	arhgap27
402857	s1pr4	792958	LOC792958
110439843	LOC110439843	368752	vat1
406794	ube2j1	58024	coil
777696	nod2	561146	sema4bb
100003436	si:dkey-6n21.12	110439011	LOC110439011
567448	mfn2	100003913	si:ch73-380l3.2
110439057	LOC110439057	100536189	abtb1
100137117	si:dkey-1h24.2	494097	mgme1
378983	postna	561967	si:ch211-93f2.1
559150	hmcn1	795570	LOC795570
568615	sel1l	100000570	hirip3
566612	ca9	406421	acox3
797252	emid1	541364	zgc:113333
566920	akap10	100149386	bnipl
447924	zgc:103678	100332784	si:ch73-12o23.1
561737	pik3ca	393176	rad9a
100144568	si:dkey-3h3.3	553667	eri2
406663	cog2	541407	wdcp
794381	si:dkey-78a14.4	572121	incenp
393614	cacng2a	445192	mfsd6l
557744	tbc1d14	368823	fkbp11
566350	gbf1	334135	mapre1a
563883	adgrg11	101884413	LOC101884413
561846	prlrb	368737	pa2g4a
100003157	zbtb18	394130	acad8
101885131	si:ch211-204a13.2	569837	si:ch211-161h7.4
100002625	akap6	796940	LOC796940
100334178	LOC100334178	100126129	znf1065
562692	tuft1a	110437931	LOC110437931
406256	zgc:66427	405803	rngtt
565819	LOC565819	564872	slc16a6a
565337	gltpd2	108190785	LOC108190785
559992	tpd52	560232	LOC560232
101886358	LOC101886358	393554	trip13
553545	tmem127	777631	zgc:153215
406442	amfr	393097	dcaf13
100005471	lzts2b	323329	mat2aa
568872	slc4a7	100148835	dgkzb
100148963	tmem158	557148	mdm1
100037384	ube2j2	321786	pttg1ipa
101883215	LOC101883215	100006926	LOC100006926
100006059	si:ch211-152c8.2	445215	mastl
567031	wdr47b	557342	si:dkey-86e18.1
405812	cyb5b	497384	prkca
560944	pfkpa	559800	LOC559800
562282	ppp2r5b	404622	camlg
100329900	frmd4bb	103911292	si:ch211-281p14.2
436901	ccdc85cb	406394	yy1b
556657	tsnax	541509	elp3
559228	hyal2b	30432	smn1
559461	wdr26a	393278	rnf175
568930	LOC568930	565437	fam83ha
100151368	c1ql3a	100331958	ttc28
564734	adamts10	406475	usf1l
558742	si:dkey-49n23.1	751740	anapc15
335285	si:ch73-170d6.2	563413	ugt5c3
567494	pum2	569944	si:ch73-52e5.1
100007788	rab38b	553561	sub1a
83917	psma6l	559803	smarca1
565097	duox	195816	lmnb1
110438439	LOC110438439	406398	sumo3a
103909593	LOC103909593	368686	slc39a13
793290	spred2b	565869	klf9
562001	si:ch211-113j13.2	798974	nadsyn1
402784	dnajc27	110437808	LOC110437808
777704	zgc:123035	101884589	LOC101884589
563867	pcolcea	565206	hcfc1b
568941	oc90	564336	st6galnac1.1
108190109	LOC108190109	799608	ccnd2a
100002785	ms4a17a.8	799153	sort1b
406755	rp2	447941	apip
557044	si:ch211-69e5.1	100538290	si:ch1073-15f19.2
450004	map2	541381	gnb1l
558943	phf24	555511	add1
564300	lrrc58b	101882358	LOC101882358
553785	lrrc4c	541391	faim2a
492786	brox	571408	dock2
100037357	tnfrsf1b	570062	ncaph
100538182	si:dkey-183c6.8	334351	cuedc2
556787	si:ch211-285c6.4	553693	raver1
402947	zgc:77784	555294	zmp:0000001168
792585	ccr12b.1	799847	dennd5a
101882419	urgcp	569585	sptbn5
563730	hecw1b	103912048	LOC103912048
559010	exoc5	30271	nr1d2b
100536303	si:ch211-202m22.1	110438047	LOC110438047
503707	upp1	404603	mettl14
394083	slc33a1	436847	nr1h4
569467	si:dkey-33i11.9	100005372	ice2
100537822	rnf5	100415800	ugt5f1
335897	sap130b	100333732	thsd7bb
550361	cpt1cb	321114	snu13b
327466	dyrk1ab	110438288	LOC110438288
777611	zgc:153935	393872	rad1
406667	pi4k2a	550343	nepro
282557	drd2a	692292	mtf2
437007	tspan18a	100537478	ubxn2a
559403	acaca	550278	jmjd7
568033	sv2a	447818	taf6
100004951	LOC100004951	796591	si:zfos-741a10.3
101886064	LOC101886064	450054	tpk1
566078	man1a1	492815	cdca8
562195	epha7	101885604	LOC101885604
100151158	gak	108179109	cdh28
436907	nipal3	565706	pde4ba
100334480	tmtopsb	568360	spdl1
493591	pcdh2ab5	368888	sertad2b
334175	hgs	110440170	LOC110440170
432387	pkd2	550374	stard4
334026	si:dkey-40c23.2	445224	mphosph6
554200	nsfb	768138	ebpl
101886672	LOC101886672	337142	cnn3b
100149572	arfgap1	286830	lamb1a
394007	xpnpep2	792924	wu:fb55g09
570084	nfr	100334728	eml4
559226	golga4	100001620	LOC100001620
101883059	LOC101883059	326954	tecrb
30461	cdh11	368207	ktn1
100005732	zfyve1	562199	myo9ab
563594	st6galnac5a	101886270	LOC101886270
568980	snx19b	405854	fahd2a
103909469	LOC103909469	795099	egr4
450041	ccdc113	110440006	LOC110440006
570716	slc4a2b	100034367	utrn
103910004	LOC103910004	798347	tpp1
793843	LOC793843	321504	ssb
568356	afap1	445299	immp2l
563956	sdhaf4	337386	snx1a
101886605	adamtsl5	100144563	spc25
110437844	LOC110437844	791205	crym
100329381	gpr180	110437720	wbp11
415099	rela	566749	smc5
394068	tnni2a.2	100535454	LOC100535454
436861	sec63	393712	exosc4
493634	arnt	767682	zgc:152830
101884270	gpr52	402829	ubox5
560514	osbpl11	550410	zgc:112183
101055497	rnf167	445138	desi2
554166	st3gal7	494065	dhodh
100537975	trip11	568482	abcc12
559288	c1ql4a	560667	mtrr
103910279	LOC103910279	570968	rnf144aa
101882249	LOC101882249	550328	park2
793824	LOC793824	561667	tysnd1
565111	peak1	100005603	ssbp3a
101885863	LOC101885863	336342	wu:fj64h06
100332110	dner	393160	tigarb
556298	micall2b	559614	myom3
447813	pdxdc1	100329351	LOC100329351
58041	hspe1	101882057	crybg3
572518	oat	799144	ppp1r3da
562136	si:dkey-13n15.2	559769	tssc4
449532	bcl9l	570021	LOC570021
64271	epha4a	393282	snu13a
791453	mhc1zba	437014	rnpep
570879	golga3	326793	lrrc42
403311	cacna1db	368519	stat4
368449	epb41l5	100537446	im:7147486
110439137	LOC110439137	791215	bloc1s6
352934	npas2	795295	si:ch211-240b21.4
30683	ft1	406352	hnrnpc
559066	myofl	492789	zgc:101699
368448	ptpn4a	335153	setdb2
568363	kcnn4	798716	ispd
436697	slc48a1a	100004133	ddb2
557230	si:ch211-244b2.3	793949	tmsb4x
568099	dsela	100001676	shpk
567075	sec16a	110437928	LOC110437928
108183496	LOC108183496	563959	si:ch211-8c17.3
100002445	unc5db	566441	ube2c
541335	zgc:114046	553723	wbp4
101883360	phf21b	100320774	yeats2
565439	slc12a3	550368	zgc:112023
436668	faimb	566846	dub
352918	opn4.1	550524	cbsa
100004456	cldn10b	336741	slc38a6
100334727	si:ch73-345f18.3	100330496	qser1
569489	fetub	449987	zgc:103759
100334925	si:dkeyp-97a10.3	445386	ndc80
405838	slc13a3	100037337	ncapg2
108181175	LOC108181175	322674	pask
553547	pgpep1	110440027	LOC110440027
100536501	LOC100536501	101884219	crtam
100334729	rab11fip2	556154	mamdc2a
406765	stk38a	492481	rp9
795613	trps1	100422734	mpp5b
563073	fam129ba	553214	eif4ba
553355	col4a2	436884	tyw3
336430	si:ch73-21k16.5	393631	ccdc43
100320415	si:ch211-246m6.5	562412	arsk
101886679	LOC101886679	30188	ccne1
796439	fam234a	450022	ctsz
101883422	LOC101883422	108179232	LOC108179232
541512	si:ch211-244b2.4	447894	zgc:101715
449665	gpsm2l	393771	tmem126a
436925	cacnb1	406630	cmc1
553687	plpp6	567525	fibcd1
767630	atp8a1	564555	mtss1lb
561669	si:zfos-2326c3.2	100333901	pitpnm2
492696	si:dkey-16j16.4	394043	ephx1
393482	tm9sf4	792017	brms1la
101884814	si:dkey-9c18.3	100330084	LOC100330084
100334231	plch2a	571911	fdft1
561353	efr3bb	641478	mmd
563208	ccl38a.5	327566	lpcat4
101883331	LOC101883331	100034592	gna15.3
100005402	stac	393763	aida
567622	LOC567622	796407	nrip1a
799638	phospho2	324185	fanci
415224	tmed4	566753	dbf4b
571331	pstpip1a	550462	ubl7a
30499	evx1	561913	si:rp71-84d19.3
563297	grin2aa	556683	fam124a
101886407	LOC101886407	494046	anapc4
557232	aspa	556903	socs7
393957	stk38l	563246	exoc3l4
100006249	chst2b	110438862	LOC110438862
553749	zgc:113279	110437878	LOC110437878
563094	tenm1	790921	elp5
322228	bhmt	555435	adgb
101886126	ate1	103910718	LOC103910718
558951	tdg.2	100008368	nthl1
100038780	ggact.3	100002184	hpf1
100001603	brinp3a.2	569100	rev3l
101884747	LOC101884747	559398	cdca5
558788	si:ch211-233m11.1	110440168	LOC110440168
30155	tenm3	103910162	LOC103910162
101884617	LOC101884617	100002366	gaa
100334928	tgfbr2a	563525	lyrm9
393244	ankrd22	619247	aasdhppt
798022	nt5c1ba	568235	mrpl42
571998	si:ch73-206p6.1	563603	si:ch211-148l7.4
114446	dlg1	768134	si:dkey-184p18.2
557981	usp32	110437841	LOC110437841
555701	rreb1b	563090	sin3aa
561367	zgc:194252	336613	cyfip1
110437937	LOC110437937	100329494	tubgcp6
792986	slc39a3	100003680	pelp1
100005512	LOC100005512	101884923	LOC101884923
768198	klhl24a	368359	txnipa
562289	tfeb	436701	mrpl43
569554	igsf9bb	751664	pter
101886304	si:ch1073-272o11.3	338248	si:ch211-282b22.1
791129	ccdc170	101884646	si:dkey-14d8.24
100001417	fbxo30a	100334492	entpd5b
100008047	kctd6a	103910871	LOC103910871
559806	htr2ab	101886419	LOC101886419
436896	zgc:92249	449663	gpd1l
406698	tm9sf3	100307086	pttg1
492359	zgc:91976	100150474	si:dkey-42l23.4
103909796	LOC103909796	108180146	LOC108180146
101886226	atp9a	324366	gstm.1
556580	wfs1b	322462	sult6b1
571972	flrt2	100000399	dnase2
110439926	LOC110439926	100333881	tbc1d8
58150	hand2	568169	cers1
796844	stard5	100151256	cmbl
436640	slc25a48	108191668	LOC108191668
100150452	si:ch211-117c9.5	572492	pld1b
323856	tgm2b	559572	l3mbtl1b
100537766	wu:fb97g03	436933	sesn1
559119	tnk2b	337084	myl12.2
100332526	LOC100332526	564392	smpdl3b
336159	optn	550480	ms4a17a.1
100034462	si:dkey-24l11.2	100330864	LOC100330864
565913	kif19	561471	pigl
386887	ankrd27	791728	renbp
100151093	gstk2	561924	ddit3
559196	LOC559196	559142	LOC559142
101884510	LOC101884510	393209	kif18a
100005420	LOC100005420	393148	cdc14b
768289	krt94	100331307	si:dkey-17m8.2
101884675	si:ch211-149b19.2	103909624	si:dkey-33c14.7
110439032	LOC110439032	571775	zgc:162025
100331669	tpp2	553244	tom1
799889	LOC799889	100332570	evi5a
110437934	LOC110437934	337498	pepd
30750	pparda	572042	hipk1a
562395	shkbp1	335866	irf2bp2a
100537540	znf217	321155	si:dkey-238i5.2
378986	fga	556399	cfp
108183427	LOC108183427	327471	wee2
541550	ablim1b	100003646	si:ch211-286b5.6
792835	tor3a	101882791	zmp:0000000608
100148642	pigv	492485	lrrc20
445568	gipc1	266964	tlx1
118437	gpc4	550282	dcxr
100009646	acap3b	568392	LOC568392
494104	zgc:101583	442930	ctdp1
100535622	LOC100535622	449989	sssca1
326050	nucb2b	553451	sptbn1
101882917	LOC101882917	494154	lancl1
100141364	zgc:172180	100462714	qkib
791189	hyal6	561231	arhgap4b
557337	prkd3	100330801	cd44b
393578	ufl1	103909305	LOC103909305
568568	rc3h1a	110439798	LOC110439798
556956	pi4kaa	100307070	s100a11
571870	sec24c	321689	ube2e3
378966	ncf1	100537977	iqgap3
553780	mapk15	560799	rab44
108182684	LOC108182684	393960	tube1
100330777	tbc1d2b	360133	sestd1
100334010	cenpv	101883097	LOC101883097
108180095	il11	352931	sepp1a
110440012	LOC110440012	108190056	LOC108190056
100126029	lurap1	334757	sfxn2
103911103	LOC103911103	570502	kif21b
368418	slc35a5	114461	tnfrsfa
569036	ydjc	334752	fam192a
556924	si:ch211-285c6.1	550568	pdlim1
110439279	LOC110439279	79381	gstp1
171474	il17rd	553405	pole
103911506	LOC103911506	100151464	cdkn1d
386661	scd	791894	aurkb
407698	ano1	110439128	LOC110439128
541480	zgc:113119	563498	enpp5
64280	psmb10	100332443	LOC100332443
436734	txn	553315	srek1ip1
100334535	usp18	110438591	LOC110438591
100332329	LOC100332329	557127	si:dkey-119f1.1
572173	prcc	573743	zbtb41
100334202	LOC100334202	327510	rhoq
100334572	arfgef2	571144	dars2
402997	tmem62	560369	si:dkey-118j18.1
[truncated: 1,176 more rows]

## Sheet: Kegg_Up 4hpi
List of enriched Kegg pathways upon up-regulated genes at 4 hpi (p-adj < 0.05|(Log2(FC) ≥ 1)).
Enrichment FDR	nGenes	Pathway Genes	Fold Enrichment	Pathway	Genes
1.80414665859054e-08	63	197	2.19049936091099	Protein processing in endoplasmic reticulum	ngly1 hsp90b1 sel1l dnajc5ab man1a1 sec61a1l cul1b map2k7 yod1 pdia6 hsp90aa1.1 si:ch211-282j22.3 atf6 hyou1 rrbp1a dnajb11 ero1a sec63 syvn1 dnajc3b pdia4 tram1 sec23b ssr4 vcp sec31a sec61a1 hsp70.3 edem1 hsp90ab1 dnaja1 sar1ab ube2j1 derl3 canx ube2d1b dnajb12a derl2 plaa dnajc5aa sec24d capn1b ubqln4 hspa4l dnajb2 ube2j2 lman1 edem3 wfs1b calr erlec1 capn2a dnajb1a nploc4 traf2b calr3b sec24c…
0.00333273401786365	41	168	1.80803121852971	Phagosome	sec61a1l ncf2 itga5 c3a.1 zgc:65894 cyba thbs4b atp6v0a1a hgs sec61a1 atp6v1g1 sec22ba atp6v0b ncf1 atp6v0a2a atp6v0cb mhc1zba atp6ap1b canx tubb5 tubb2 ncf4 c3a.6 itgb3b c3a.3 hbl4 pikfyve cybb atp6v0ca marco colec12 itgb1a calr atp6v1ab tap1 calr3b dync1i2b calr3a itgb1b tubb6 tcirg1b
0.00333273401786365	44	204	1.75485382974942	Cytokine-cytokine receptor interaction	tnfa bmpr2a inhbaa tnfsf13b spaw acvr1ba bmpr1aa bmpr2b il11ra tgfb1b m17 il11a il12a ccl19b il13ra2 lifrb gdf7 lepb il22 csf3r acvr1bb si:dkey-101k6.5 cxcl14 nradd il17ra1a tnfrsf9a zmp:0000001127 crfb4 zgc:153759 tnfrsf1b lepr eda csf2rb tnfrsf18 il10 tnfrsf11a tnfrsf9b il34 il17rc cxcl11.1 il6 il6r il6st bmpr1ab

## Sheet: Kegg_4dpi
List of enriched Kegg pathways upon all differentially expressed genes at 4 dpi (p-adj < 0.05).
Enrichment FDR	nGenes	Pathway Genes	Fold Enrichment	Pathway	Genes
0.000555228865467931	19	153	3.08978260869565	Cell adhesion molecules	cd276 oclnb oclna cldnb cadm1a zgc:110333 itga6a cldnk cldne cldnf cldn19 ncam1a pecam1 cldnh zgc:136892 si:dkey-71p21.13 esama cdh1 mag
0.000345785322736842	30	229	2.50522914218566	Tight junction	tuba1a tjp3 oclnb magi1b oclna myl9b cldnb arhgef18a prkag2a cgnl1 tjp2b marveld2a rab13 zgc:110333 cldnk cldne cldnf jun cldn19 cgnb epb41l4b marveld2b tjp2a cldnh zgc:136892 rac1a tjp1a ppp2r2bb marveld3 crb3a

## Sheet: GOterms_Up 4hpi
List of enriched GOterms upon up-regulated genes at 4 hpi (p-adj < 0.05|(Log2(FC)≥ 1)).
Enrichment FDR	nGenes	Pathway Genes	Fold Enrichment	Pathway	Genes
2.46651325568477e-09	57	154	2.62011303702187	Inflammatory response	psmb8a optn mxb elovl5 stat1a mxe helz2 echdc2 cyba gsr tyk2 mxc sgk1 si:dkeyp-9d4.2 stat2 cebpa slc2a3b lifrb si:ch211-219a4.3 ncf4 mmp9 tlr5a rdh12l dram1 csf3r si:ch211-193e13.5 lpcat2 samsn1a alox5ap si:dkey-25e12.3 papss2b si:dkey-40g16.6 ccl19a.1 slc2a6 card9 crfb4 irge4 adgrg3 timp2b sc:d156 srgn gpr84 si:ch73-343l4.8 si:dkey-102g19.3 dicp3.3 si:ch211-91p5.3 si:ch211-136m16.8 LECT2 scpp8 s…
6.48727900253014e-07	50	137	2.46549711617687	Neutrophil migration	rhogb gdpd3b tnfa cyba ocstamp cebpa slc2a3b snx10b ncf4 gadd45aa tlr5a dram1 il22 csf3r tlr5b si:ch211-193e13.5 cd22 samsn1a si:dkey-25e12.3 slc2a6 ft1 ccr12b.1 card9 si:cabz01007802.1 tnfrsf1b adgrg3 csf2rb tnfrsf18 lacc1 srgn gpr84 si:ch73-343l4.8 mcoln3a si:dkey-102g19.3 si:ch73-248e21.5 si:ch211-153b23.7 si:ch211-136m16.8 scpp8 cd180 si:dkey-27h10.2 si:dkey-195m11.11 csf3b csf3a il6 ccl35.1 …
1.76194052411965e-05	42	137	2.37304097432024	Acute inflammatory response	rassf6 gdpd3b tnfa cldnb ero1a cyba ocstamp ube2d1b snx10b stap2b gadd45aa dram1 syngr2a il12bb samsn1a si:dkey-25e12.3 pla2g4f.1 lygl1 slc2a6 ccr12b.1 card9 zgc:113314 adgrg3 tnfrsf18 lacc1 gpr84 si:ch211-264f5.6 si:ch211-152p11.4 si:ch211-153b23.7 si:ch211-136m16.8 si:ch211-217k17.11 cd180 si:ch211-256a21.4 csf3b cxcl11.1 cyp2k8 csf3a il6 si:dkey-33i11.9 ccl35.1 gpr132b si:ch211-194m7.4
1.08949348803718e-06	51	141	2.36434851653885	Granulocyte migration	rhogb gdpd3b tnfa cyba ocstamp cebpa slc2a3b snx10b ncf4 tlr5a dram1 il22 tlr5b si:ch211-193e13.5 cd22 lpcat2 samsn1a alox5ap si:dkey-25e12.3 lygl1 hck slc2a6 ft1 ccr12b.1 card9 tnfrsf1b ppp1r18 adgrg3 csf2rb tnfrsf18 lacc1 srgn gpr84 si:ch73-343l4.8 si:dkey-102g19.3 dicp3.3 si:ch73-248e21.5 si:ch211-153b23.7 si:ch211-136m16.8 scpp8 cd180 si:dkey-195m11.11 csf3b csf3a ccl35.1 gpr132b plek mrps15 …
9.9304138501315e-06	46	142	2.33185334726261	Defense response to Gram-negative bacterium	rhogb gdpd3b tnfa cyba b3gnt5a ocstamp ncf1 cyth4a ube2d1b snx10b gadd45aa dram1 il22 si:ch211-193e13.5 samsn1a si:dkey-25e12.3 lygl1 slc2a6 ccr12b.1 card9 zgc:153759 rnaseka ppp1r18 adgrg3 tnfrsf18 lacc1 srgn gpr84 lpxn si:dkey-102g19.3 si:ch73-248e21.5 si:ch211-153b23.7 si:ch211-136m16.8 scpp8 cd180 si:ch211-256a21.4 csf3b csf3a il6 pik3r5 ccl35.1 gpr132b plek mrps15 si:ch211-194m7.4 ARF5
1.44320853390408e-05	45	143	2.32461156668105	Neutrophil activation	rhogb gdpd3b tnfa cyba ocstamp slc2a3b ube2d1b snx10b ncf4 gadd45aa dram1 il22 syngr2a cd22 il12bb samsn1a si:dkey-25e12.3 lygl1 slc2a6 ft1 ccr12b.1 card9 prlh2 adgrg3 csf2rb tnfrsf18 lacc1 gpr84 mcoln3a si:ch211-153b23.7 si:ch211-136m16.8 scpp8 cd180 si:dkey-27h10.2 si:ch211-256a21.4 csf3b cxcl11.1 csf3a il6 ccl35.1 gpr132b plek si:ch211-194m7.4 rab38b
3.07031995680735e-05	42	152	2.32461156668105	Response to virus	mxb cd74a sdcbp2 mxe helz2 cyba mxc mxf si:dkeyp-9d4.2 stat2 psme2 mhc1zba slc2a3b si:ch211-219a4.3 gadd45aa dram1 saa syngr2a samsn1a hsd17b14 si:dkey-25e12.3 si:dkey-40g16.6 lygl1 ccl19a.1 slc2a6 irge4 si:ch73-190m4.1 tnfrsf18 si:dkey-17m8.1 si:dkeyp-27c8.2 gig2p si:ch211-153b23.7 si:ch211-91p5.3 dhx58 cd180 si:dkey-211g8.8 cxcl11.1 csf3a si:dkey-33i11.9 ccl35.1 litaf ARF5
1.08949348803718e-06	54	149	2.30630753859695	Macrophage migration	rhogb gdpd3b sult5a1 tnfa pik3cg cyba gsr ocstamp mxf lrrfip1a cebpa slc2a3b snx10b mmp9 gadd45aa tlr5a dram1 csf3r tlr5b si:ch211-193e13.5 cd22 samsn1a si:dkey-25e12.3 tspan14 lygl1 slc2a6 ft1 ccr12b.1 card9 rnaseka tnfrsf1b ppp1r18 adgrg3 csf2rb tnfrsf18 srgn gpr84 si:ch73-343l4.8 si:dkey-102g19.3 si:ch73-248e21.5 si:ch211-153b23.7 si:ch211-136m16.8 scpp8 cd180 si:dkey-27h10.2 si:ch73-90p23.1 c…
6.36120144223122e-06	50	150	2.27903094772652	Myeloid cell apoptotic process	rhogb pdcd6 gdpd3b tnfa cyba heg1 ocstamp higd1a tmem120a slc2a3b ube2d1b snx10b gadd45aa dram1 cd22 il12bb samsn1a si:dkey-25e12.3 lygl1 slc2a6 ft1 ccr12b.1 card9 zgc:113314 rnaseka sptlc2b adgrg3 csf2rb tnfrsf18 lacc1 gpr84 pnp5a si:ch211-153b23.7 si:ch211-136m16.8 scpp8 cd180 si:dkey-27h10.2 C24H8orf34 si:ch211-256a21.4 csf3b cxcl11.1 cyp2k8 f8 csf3a il6 si:dkey-33i11.9 ccl35.1 gpr132b plek si…
1.620516564241e-05	48	157	2.24445254714033	Defense response to virus	optn mxb stat1a mmp14b cd74a egfra mxe phactr4a helz2 myofl tyk2 jak1 mxc si:dkeyp-9d4.2 nampta stat2 psme2 tfpia mhc1zba slc2a3b socs1a lifrb si:ch211-219a4.3 mpeg1.2 si:dkey-40g16.6 ccl19a.1 tgfbr2a zgc:153759 si:ch211-196h16.5 parp4 irge4 tmem176l.4 timp2b si:ch73-190m4.1 tnfrsf18 si:dkey-17m8.1 tap1 ehbp1l1b si:ch211-91p5.3 dhx58 si:ch211-217k17.11 si:dkey-211g8.8 si:ch211-207n23.2 si:ch211-1…
7.80539092511787e-07	63	197	2.19049936091099	Protein processing in endoplasmic reticulum	ngly1 hsp90b1 sel1l dnajc5ab man1a1 sec61a1l cul1b map2k7 yod1 pdia6 hsp90aa1.1 si:ch211-282j22.3 atf6 hyou1 rrbp1a dnajb11 ero1a sec63 syvn1 dnajc3b pdia4 tram1 sec23b ssr4 vcp sec31a sec61a1 hsp70.3 edem1 hsp90ab1 dnaja1 sar1ab ube2j1 derl3 canx ube2d1b dnajb12a derl2 plaa dnajc5aa sec24d capn1b ubqln4 hspa4l dnajb2 ube2j2 lman1 edem3 wfs1b calr erlec1 capn2a dnajb1a nploc4 traf2b calr3b sec24c…
8.87422589646803e-05	47	149	2.12443668177241	Leukocyte	rhogb sult5a1 illr4 cyba gsr ncf1 cebpa slc2a3b ncf4 mmp9 hhla2a.1 gadd45aa tlr5a dram1 csf3r tlr5b si:ch211-193e13.5 lpcat2 samsn1a alox5ap si:dkey-25e12.3 papss2b slc2a6 ccr12b.1 card9 adgrg3 ssuh2.3 srgn gpr84 si:ch73-343l4.8 si:ch211-264f5.2 si:dkey-102g19.3 dicp3.3 si:ch73-248e21.5 si:ch211-136m16.8 LECT2 scpp8 chia.6 cd180 si:dkey-27h10.2 si:ch73-90p23.1 si:dkey-195m11.11 csf3a ccl35.1 plek…
2.69938661408256e-05	53	165	2.11380120401635	Chemokine production	rassf6 mmp14a gdpd3b sult5a1 mmp14b msx1b tnfa wls cldnb dcn sdcbp2 dlx3b fn1a ocstamp ube2d1b fstl1b si:ch211-219a4.3 snx10b gadd45aa dram1 tlr5b samsn1a si:dkey-25e12.3 steap4 pla2g4f.1 tnfaip2b rdh10a ccr12b.1 creb3l2 angptl2b cd151l rnaseka hoxc3a adgrg3 cxcl18b timp2b gpr84 pnp5a si:ch211-136m16.8 ifitm1 cd180 lhfpl2b csf3b ehd1a cnn3a cyp2k8 csf3a il6 wnt5b ccl35.1 chmp5b hoxa9a si:dkey-6n2…
0.00011953198155055	48	153	2.08285196374622	Response to cytokine	pfkfb3 rhogb ncf2 cd74a sele tfeb sdcbp2 egfra cyba higd1a socs3a tfpia mhc1zba slc2a3b ramp2 lifrb ncf4 gadd45aa tlr5a dram1 il22 si:ch211-193e13.5 cd22 samsn1a si:dkey-25e12.3 hck slc2a6 tgfbr2a arhgap31 card9 prlh2 adgrg3 rpz5 csf2rb gpr84 ehbp1l1b si:dkey-102g19.3 si:ch211-153b23.7 tnfrsf9b si:ch211-136m16.8 si:dkey-27h10.2 tmem176l.1 il4r.1 ccl35.1 litaf plek il6st mapkapk3
6.42230873183837e-05	51	167	2.07991561229357	Phagocytosis	pygb stat1a sdcbp2 phactr4a cyba gsr jak1 sgk1 stat2 vegfab cebpa slc2a3b lifrb rai14 adprhl1 mmp9 tlr5a dram1 csf3r tlr5b si:ch211-193e13.5 cd22 samsn1a alox5ap si:dkey-25e12.3 smtnl si:dkey-40g16.6 lygl1 adam8b slc2a6 card9 si:ch211-181d7.3 zgc:113314 irge4 adgrg3 timp2b zyx srgn si:ch73-343l4.8 ehbp1l1b si:dkey-102g19.3 LECT2 scpp8 si:dkey-27h10.2 si:dkey-195m11.11 si:zfos-2326c3.2 tmem176l.1 …
5.68583848686963e-05	52	166	2.07391816243114	Cellular response to ionizing radiation	rhogb rab20 gdpd3b cd74a sele sdcbp2 pik3cg cyba jak1 sgk1 mxf ncf1 tfpia slc2a3b lifrb gadd45aa tlr5a dram1 tlr5b syngr2a si:ch211-193e13.5 cd22 samsn1a si:dkey-25e12.3 tspan14 lygl1 slc2a6 ccr12b.1 card9 rnaseka tnfrsf1b ppp1r18 adgrg3 gpr84 si:dkey-102g19.3 si:ch211-153b23.7 si:ch211-136m16.8 scpp8 cd180 si:dkey-27h10.2 csf3b tmem176l.1 cxcl11.1 cyp2k8 csf3a il4r.1 ccl35.1 litaf plek il6st tci…
5.68583848686963e-05	55	171	2.02942279630886	Nitric oxide biosynthetic process	fmnl3 ptgs2a mmp14b sele cldnb col5a1 hmcn1 myofl kdr fn1a jak1 myo1ca si:dkey-40c11.2 tfpia ramp2 mpeg1.2 gadd45aa krt94 dram1 tlr5b cd22 samsn1a si:dkey-25e12.3 pld1a lygl1 slc2a6 arhgap31 trpv4 creb3l2 angptl2b tnfrsf1b cavin2b adgrg3 hbegfa rpz5 RIN2 lats2 shroom4 she si:ch211-136m16.8 si:ch211-183d21.1 cd180 vclb tmem176l.1 cnn3a arhgef12b zcchc14 f8 csf3a il4r.1 ccl35.1 errfi1a col4a2 itgb1…
0.000111479928007104	53	169	2.01032841780576	Hematopoietic system	mmp14a fmnl3 f3b mmp14b dcn col5a1 jag1b pkd2 hmcn1 myofl fn1a jak1 myo1ca mvp socs3a sgk1 socs3b si:dkey-40c11.2 tfpia ramp2 fstl1b lifrb rpz4 foxc1b pld1a adam8b arhgap31 plpp3 colec12 ahnak mxra8a creb3l2 angptl2b cavin2b itgb1a cxcl18b hbegfa rpz5 zyx hspg2 RIN2 zcchc24 col12a1a lats2 si:ch211-183d21.1 tnfaip6 vclb tmem176l.1 cnn3a il4r.1 col4a2 itgb1b il6st
7.43918383747111e-05	57	183	1.98188037415756	Germ cell migration	rho mmp14a dlc meis1a sav1 mmp14b wls msi1 dcn zeb1b rrbp1a anxa13 ildr2 adma gpc4 hmcn1 foxf2a si:ch211-195b15.7 faimb sgk1 gli2a il11ra mpp6b si:dkey-40c11.2 vegfab itga11a syt5a fstl1b rai14 tsku rreb1b fgd6 oaz2a rbpms2a foxc1b pcolcea fgfr2 plekhg2 rdh10a plpp3 creb3l2 angptl2b yap1 met itgb1a boc cxcl18b si:ch73-138n13.1 zcchc24 gra lats2 lpl hapln1a si:ch211-183d21.1 cnn3a arhgef12b ddah2

## Sheet: GOterms_Up 4dpi
List of enriched GOterms upon up-regulated genes at 4 dpi (p-adj < 0.05|(Log2(FC)≥ 0,1)).
Enrichment FDR	nGenes	Pathway Genes	Fold Enrichment	Pathway	Genes
8.34595315870755e-12	24	169	8.1061388410786	Astrocyte	hapln2 fabp7a clic2 flj13639 ppp1r14aa plp1b anxa13 csrp1b tppp2 cx27.5 mbpa si:dkey-24c2.9 cldnk cldn19 arhgap23a hepacama s100b si:ch211-133n4.4 crp1 cx47.1 cd59 si:dkey-200l5.4 slc1a2b cdaa
8.34595315870755e-12	25	174	7.82302002126152	Myelination	hapln2 flj13639 ppp1r14aa plp1b anxa13 abhd3 ppfibp2b csrp1b tppp2 cx27.5 mbpa si:dkey-24c2.9 cldnk padi2 cldn19 arhgap23a hepacama s100b si:ch211-133n4.4 crp1 cx47.1 sox10 cd59 si:dkey-200l5.4 cdaa
3.37879753796836e-11	24	173	7.51009922041106	Myelination in peripheral nervous system	hapln2 flj13639 ppp1r14aa plp1b anxa13 abhd3 ppfibp2b csrp1b tppp2 cx27.5 mbpa si:dkey-24c2.9 cldnk padi2 cldn19 arhgap23a hepacama si:ch211-133n4.4 crp1 cx47.1 sox10 cd59 si:dkey-200l5.4 cdaa
6.93446690976294e-11	23	170	7.47187988595604	Myelin maintenance	hapln2 flj13639 ppp1r14aa plp1b anxa13 abhd3 ppfibp2b csrp1b tppp2 cx27.5 mbpa si:dkey-24c2.9 cldnk padi2 cldn19 arhgap23a hepacama si:ch211-133n4.4 crp1 cx47.1 cd59 si:dkey-200l5.4 cdaa
1.72231262107339e-08	18	167	7.29552495697074	Cerebellar Purkinje cell layer structural organization	fabp7a flj13639 ppp1r14aa plp1b psat1 nkx6.1 csrp1b tppp2 cx27.5 cldnk padi2 cldn19 hepacama si:ch211-133n4.4 crp1 cx47.1 cd59 si:dkey-200l5.4
3.9864450471566e-11	24	178	7.29552495697074	Central nervous system myelin formation	hapln2 fabp7a flj13639 ppp1r14aa plp1b anxa13 abhd3 csrp1b tppp2 cx27.5 mbpa si:dkey-24c2.9 cldnk cldn19 arhgap23a hepacama s100b si:ch211-133n4.4 crp1 cx47.1 cd59 si:dkey-200l5.4 slc1a2b cdaa
3.9864450471566e-11	24	171	7.29552495697074	Oligodendrocyte	hapln2 mmp14b flj13639 ppp1r14aa plp1b anxa13 ppfibp2b csrp1b rgs3b tppp2 cx27.5 si:dkey-24c2.9 cldnk padi2 cldn19 arhgap23a hepacama si:ch211-133n4.4 crp1 cx47.1 sox10 cd59 si:dkey-200l5.4 cdaa
2.73104211273521e-09	20	164	7.15247544801053	Optic chiasma development	hapln2 cdh17 mfsd4ab flj13639 ppp1r14aa plp1b anxa13 csrp1b tppp2 cx27.5 si:dkey-24c2.9 cldnk cldn19 hepacama si:ch211-133n4.4 crp1 cx47.1 cd59 si:dkey-200l5.4 cdaa
4.58301318273299e-10	22	172	7.09287148594378	Central nervous system myelination	hapln2 flj13639 ppp1r14aa plp1b anxa13 abhd3 csrp1b tppp2 cx27.5 mbpa si:dkey-24c2.9 cldnk cldn19 arhgap23a hepacama s100b si:ch211-133n4.4 crp1 cx47.1 cd59 si:dkey-200l5.4 cdaa
1.43824501457769e-09	21	163	7.09287148594377	Peripheral nervous system myelin maintenance	hapln2 flj13639 ppp1r14aa plp1b anxa13 ppfibp2b csrp1b tppp2 cx27.5 mbpa si:dkey-24c2.9 padi2 cldn19 arhgap23a hepacama si:ch211-133n4.4 crp1 cx47.1 cd59 si:dkey-200l5.4 cdaa
1.97753500444346e-09	21	169	6.87462928637627	Spinal cord oligodendrocyte cell fate specification	hapln2 flj13639 ppp1r14aa plp1b anxa13 csrp1b tppp2 cx27.5 mbpa si:dkey-24c2.9 cldnk padi2 cldn19 arhgap23a hepacama si:ch211-133n4.4 crp1 cx47.1 cd59 si:dkey-200l5.4 cdaa
1.19912068052437e-10	24	181	6.85485566426781	Peripheral nervous system myelin formation	hapln2 fabp7a flj13639 ppp1r14aa plp1b anxa13 csrp1b tppp2 cx27.5 mbpa si:dkey-24c2.9 cldnk padi2 cldn19 arhgap23a hepacama s100b si:ch211-133n4.4 crp1 cx47.1 cd59 si:dkey-200l5.4 slc1a2b cdaa
5.02252425700764e-08	18	154	6.77902761488432	Cranial nerve VI	hapln2 flj13639 ppp1r14aa plp1b csrp1b tppp2 cx27.5 si:dkey-24c2.9 cldnk cldn19 hepacama si:ch211-133n4.4 crp1 cx47.1 cd59 si:dkey-200l5.4 mag cdaa
3.01796089455081e-09	21	168	6.66941647185758	Optic chiasm	tuba1a hapln2 mfsd4ab flj13639 ppp1r14aa plp1b abhd3 csrp1b tppp2 cx27.5 mbpa si:dkey-24c2.9 cldnk cldn19 hepacama si:ch211-133n4.4 crp1 cx47.1 cd59 si:dkey-200l5.4 cdaa
1.47657777376838e-09	22	167	6.64013500811758	Schwann cell development	hapln2 flj13639 ppp1r14aa plp1b ppfibp2b csrp1b rgs3b tppp2 cx27.5 mbpa si:dkey-24c2.9 cldnk padi2 cldn19 arhgap23a hepacama si:ch211-133n4.4 crp1 cx47.1 cd59 si:dkey-200l5.4 cdaa
2.35546398393044e-09	22	176	6.41273312427793	Peripheral nervous system axon regeneration	hapln2 fabp7a flj13639 ppp1r14aa plp1b anxa13 slc6a9 csrp1b tppp2 cx27.5 si:dkey-24c2.9 cldnk padi2 cldn19 arhgap23a hepacama si:ch211-133n4.4 crp1 cx47.1 cd59 si:dkey-200l5.4 cdaa
6.42087281415627e-09	22	186	6.04038087835212	Myelinating Schwann cell	hapln2 flj13639 ppp1r14aa plp1b anxa13 psat1 csrp1b tppp2 cx27.5 mbpa si:dkey-24c2.9 cldnk padi2 cldn19 hepacama si:ch211-133n4.4 crp1 cx47.1 sox10 cd59 si:dkey-200l5.4 cdaa
7.57323080363505e-09	22	183	5.96343335123935	Perineuronal satellite cell	fabp7a flj13639 plp1b anxa13 psat1 nkx6.1 csrp1b tppp2 cx27.5 mbpa cldnk padi2 cldn19 hepacama s100b si:ch211-133n4.4 crp1 cx47.1 cd59 si:dkey-200l5.4 slc1a2b si:dkey-6n21.12
1.95510559621355e-08	21	180	5.95801204819277	Reactive oxygen species biosynthetic process	hapln2 tnfsf10l npsn flj13639 ppp1r14aa plp1b anxa13 csrp1b lect2l tppp2 cx27.5 cldnk txn cldn19 arhgap23a hepacama crp1 cx47.1 cd59 si:dkey-200l5.4 cdaa
