# Supplementary material for: Dynamics of macrophage polarization support Salmonella persistence in a whole living organism
Source: eLife. 2024 Jan 15;13:e89828. doi: 10.7554/eLife.89828 (PMC10830131; doi:10.7554/eLife.89828)
Supplement: Figure 7—source data 2. — This excel file contains a list of selected differentially expressed genes upon Salmonella infection shown in Figure 7 (p-adj <0.05) with gene name, gene description, gene ID, Log2(FC) at 4 hpi, Log2(FC) at 4 dpi, the main function and relevant reference. [file elife-89828-fig7-data2.xlsx]

## Sheet: Feuil1
List of selected differentially expressed genes upon Salmonella infection (p-adj <0.05).
Gene name	Gene description	Gene ID	log2(FC) 4 hpi	log2(FC) 4 dpi	Main function	References
tnfa	tumor necrosis factor a (TNF superfamily, member 2)	405785	3.51		Pro-inflammatory cytokine	1
traf4b	tnf receptor-associated factor 4b	404035	4.31		Member of the TNF receptor associated factor (TRAF) family and mediates signal transduction from members of the TNF receptor superfamily	2
traf7	tnf receptor-associated factor 7	563746	1.89		Member of the TNF receptor associated factor (TRAF) family and mediates signal transduction from members of the TNF receptor superfamily	2
traf2b	tnf receptor-associated factor 2b	557526	2.02		Member of the TNF receptor associated factor (TRAF) family and mediates signal transduction from members of the TNF receptor superfamily	2
tnfrsf1b	tumor necrosis factor receptor superfamily, member 1B	100037357	1.4		member of the TNF receptor superfamily of proteins	2
tnfrsf9b	tumor necrosis factor receptor superfamily, member 9b	100151629	3.18		member of the TNF receptor superfamily of proteins	2
tnfaip2b	tumor necrosis factor, alpha-induced protein 2b	569366	1.39		gene whose expression is induced by TNF and highly expressed in immune cells	3
tnfaip3	tumor necrosis factor, alpha-induced protein 3	564497	1.84		gene whose expression is rapidly induced by TNF, involved in the cytokine-mediated immune and inflammatory responses	4
il12a	interleukin 12a	445410	4.63		Pro-inflammatory cytokine	5.6
il12bb	interleukin 12B, b	335994	5.68		Pro-inflammatory cytokine	5
ccl38a.5	chemokine (C-C motif) ligand 38, duplicate 5	563208	2.74		Orthologous to human CCL2, inducer of M1 macrophages	7.8
ccl38a.4	chemokine (C-C motif) ligand 38, duplicate 4	793030	3.5		Orthologous to human CCL2, inducer of M1 macrophages	7.8
ccl19a.1	chemokine (C-C motif) ligand 19a, tandem duplicate 1	794891	4.67		Chemokine that specifically induces M1 macrophage chemotaxis	9
ccl19b	chemokine (C-C motif) ligand 19b	795469	8.37		Chemokine that specifically induces M1 macrophage chemotaxis	9
cxcl18b	chemokine (C-X-C motif) ligand 18b	795785	2.68		Chemokine specific for fish species that acts as a ligand for Cxcr2 in zebrafish, stimulating chemotaxis of neutrophils	10.11
cxcl20	chemokine (C-X-C motif) ligand 20	567537	4.21		Chemokine secreted by M1 macrophages	12
c3a.1	complement component c3a, duplicate 1	321046	3.09		alpha subunit of the complement component C3 which plays a role in complement system activation. C3a anaphylatoxin modulates inflammation and possesses antimicrobial activity.	13,14,15,16
c3a.3	complement component c3a, duplicate 3	565074	5.29		alpha subunit of the complement component C3 which play a role in complement system activation. C3a anaphylatoxin modulates inflammation and possesses antimicrobial activity.	13,14,15,16
c3a.4	complement component c3a, duplicate 4	100331428	5.34		alpha subunit of the complement component C3 which play a role in complement system activation. C3a anaphylatoxin modulates inflammation and possesses antimicrobial activity.	13,14,15,16
c3a.6	complement component c3a, duplicate 6	494039	12.01		alpha subunit of the complement component C3 which play a role in complement system activation. C3a anaphylatoxin modulates inflammation and possesses antimicrobial activity.	13,14,15,16
tlr5a	toll-like receptor 5a	403138	1.86		Receptor of the TLR family that plays a role in pathogen recognition and activation of innate immune response and recognizes bacterial flagellin	17
tlr5b	toll-like receptor 5b	403139	4.35		Receptor of the TLR family that plays a role in pathogen recognition and activation of innate immune response and recognizes bacterial flagellin	17
stat1a	signal transducer and activator of transcription 1a	30768	1.05		Strong innate immune inducer, it plays a key role in the immune response against pathogens by transducing, in the nucleus, the signal from interferons	18
stat2	signal transducer and activator of transcription 2	565200	1.67		Strong innate immune inducer by driving the expression of interferon-induced genes	19,20,21
mxc	myxovirus (influenza virus) resistance C	360145	7.02		Orthologous to human MX2, which is involved the in response to exogenous dsRNA and response to virus	22
irf9	interferon regulatory factor 9	403013	1.21		encodes a transcription factor involved in mediating the type I interferon antiviral response	23.24
crfb17	interferon gamma receptor 1 (ifngr1)	571368	4.04		encodes part of the receptor complex for Ifn-γ2 in zebrafish	25
card11	caspase recruitment domain family, member 11	557072	1.81		As a member of the CARD protein family, in mammals card11 encodes a protein that functions as molecular scaffolds for the assembly of multiprotein complexes. It plays a key role in adaptive immune response and inflammation	26
card9	caspase recruitment domain family, member 9	796425	2.44		Member of the CARD protein family, in mammals CARD9 is involved in both innate and adaptive immune responses to infections and associated with activation of immune cells and productions of pro-inflammatory cytokines	27
hif1ab	hypoxia inducible factor 1 subunit alpha b	393202	1.3		Subunit of transcription factor hypoxia-inducible factor-1 (HIF-1), functionning as a master regulator of cellular response to hypoxia. In zebrafish, activation of hypoxia-inducible factor-1α (Hif-1α) delays inflammation resolution by reducing neutrophil apoptosis and reverse migration and protects against Mycobacterial infections	28.29
mmp9	matrix metallopeptidase 9 [Source:ZFIN	406397	4.99		Member of matrix metalloproteinase (MMP) family that are involved in the breakdown of extracellular matrix in many processes. MMP9 is a regulator of inflammation in many species and in zebrafish, it is involved in regeneration.	30,31,32
mmp14a	matrix metallopeptidase 14a (membrane-inserted)	373882	2.7		Member of matrix metalloproteinase (MMP) family that are involved in the breakdown of extracellular matrix in many processes. MMPs are regulators of inflammation.	33
mmp14b	matrix metallopeptidase 14b (membrane-inserted)	566945	2.25		Member of matrix metalloproteinase (MMP) family that are involved in the breakdown of extracellular matrix in many processes. MMPs are regulators of inflammation.	33
mmp11b	matrix metallopeptidase 11b	565793	8.97		Member of matrix metalloproteinase (MMP) family that are involved in the breakdown of extracellular matrix in many processes. MMPs are regulators of inflammation.	33
mmp13b	matrix metallopeptidase 13b	100006896	2.65		Member of matrix metalloproteinase (MMP) family that are involved in the breakdown of extracellular matrix in many processes. MMPs are regulators of inflammation.	33
mmp30	matrix metallopeptidase 30	678531	3.87		Member of matrix metalloproteinase (MMP) family that are involved in the breakdown of extracellular matrix in many processes. MMPs are regulators of inflammation.	33
mmp23bb	matrix metallopeptidase 23bb	550589	2.1		Member of matrix metalloproteinase (MMP) family that are involved in the breakdown of extracellular matrix in many processes. MMPs are regulators of inflammation.	33
mrc1b	mannose receptor, C type 1b	559502	-4.62		pattern recognition receptor involved in phagocytosis, marker of M2 macrophages in mammals	34
tgm2l	transglutaminase 2, like	559012	-5.01		Transglutaminase 2 involved in cell adhesion, migration and extra-cellular matrix regulation, conserved M2 marker in humans and in mammals	35
tgfbr2	transforming growth factor beta receptor 2b	30739	-2		encodes a receptor of TGF-beta ligands. TGF-beta pathway activation was shown to promote M2 macrophage polarization.	36
klf2a	Kruppel-like factor 2a	117508	-3.48		member of the zinc-finger transcription factors family that acts as endogenous regulators of cellular activation. Klf2 inhibits cytokine-mediated activation of macrophages by impairing NFκB activity	24,37,38
klf4	Kruppel-like factor 4	562155	-6.14		member of the zinc-finger transcription factors family that acts as endogenous regulators of cellular activation. Klf4 promotes M2 polarization and inhibits the inflammatory response	24,38,39,40
irf2	interferon regulatory factor 2	494071	-1.04		Anti-inflammatory transcription factor that acts as negative regulator of immune response in macrophages	41
mertka	c-mer proto-oncogene tyrosine kinase a	100322133	-1.52		Key receptor for macrophage efferocytosis that also triggers anti-inflammation and pro-resolution responses	42.43
c1qtnf6b		570839		1.9	complement regulator, possible anti-inflammatory role and supressor of arthritis development, increases the expression of interleukin-10 in macrophages	44.45
cxcl13		101886937		3.81	Chemokine that binds to the CXCR5 receptor. CXCL13 has various effect on inflammation. In addition CXCL13 is expressed in M2 macrophages in some cancer and might promote M2/TAM infiltration into malignant lesions and M2 polarization	46, 47,48
dgat1a	diacylglycerol O-acyltransferase 1a	325875		1.83	Metabolic enzyme that converts fatty acyl CoA to triacylglycerol. In macrophages, DGAT1 is important for pro-inflammatory activation. However DGAT1 expression in macrophages also protects mice from diet-induced inflammation.	49, 50
cfhl2		492777		1.08	Orthologous to several human genes including Complement factor H. In mammals, CFH regulate the complement system to prevent potentially harmful complement attack. CFH promotes M2 polarization in human macrophages.	51.52
phgdh		321928		2.24	enzyme involved in serine/glycine biosynthesis.Activated in IL-4-stimulated macrophages, phgdh functions as a metabolic checkpoint of M2 macrophages	53
f5	coagulation factor V	327320		1.46	favors defense against bacteria, enriched in Tumor-associated macrophages and in M2c macrophages , induces M2 polarization	54,55,56,57,58
kmo	kynurenine 3-monooxygenase	368242		1.39	metobolism regulator, kmo has an anti-inflammatory role in macrophages and its expression is increased in M2 macrophages	59.6
ppp1r14aa		550561		1.1	M2 macrophage marker	61
rdh10a		562840		1.54	encodes a retinol dehydrogenase and is involved in retinoic acid pathways	62
rdh12		436597		1.15	encodes a member of the family of short chain dehydrogenases/reductases that catalyze oxidation and reduction reactions. Rdh12 acts as a regulator of retinoic acid biosynthesis	63
ugt1a		641488		1.08	is involved in the phase II of various xenobiotics and endogenous compounds. ugt1a is responsible for glucuronidation of many substrat and is regulated by etinoic acid pathway	64
npsn		404039		2.22	In zebrafish nephrosin provide protection against Escherichia coli infection	65
c9	complement 9	554141		4.51	involved in the complement system and possesses antimicrobial activity.	66
hamp		402837		1.29	encodes Hepcidin protein, a key regulator of transmembrane iron transport. Upregulated during infammation, Hepcidin has a bactericidal activity	67
nos2b	nitric oxide synthase 2b	563654		3.18	encodes an enzyme which produces nitric oxide (NO). NO is involved in bacterial defence.	68
wt1b	Wilms tumor 1b	568416		1.46	encodes a zinc finger transcription factor. Wt1b was shown to be expressed in a pro-regenerative macrophage subtype in the zebrafish	69
cx47.1	Connexin 47.1	447835		6.1	also known as Gap Junction Protein Gamma 2. It plays a key roles in central and peripheral myelination in humans and provide tissue protection in mice. Mutations in this gene lead to autosomal recessive Pelizaeus-Merzbacher-like disease-1	70.71
ecm1b	extracellular matrix protein 1b	100332249		1.21	promotes M1 macrophage polarization in IBD in response to LPS stimulation, promotes tumor development, tissue development and maintenance	72,73,74
mmp25b	matrix Metallopeptidase 25b	100333601		1.22	encodes a member of the matrix metalloproteinase family and is involved in the remodelling of extracellular matrix. Mmp25 plays important function in the innate immune response to bacterial LPS	75
saa	serum amyloid A	449557	8.15	3.06	acute phase protein, chemotactic to phagocytes and induces the expression of pro-inflammtory cytokines	76.77
cxcl11.1	chemokine (C-X-C motif) ligand 11, duplicate 1	798892	6.88	1.34	chemokine, chemotactic to phagocytes, required for surveillance against pathogen	78
s100b	S100 calcium binding protein, beta (neural)	436825	3.77	2.48	Alarmine protein, pro-inflammatory, expressed in the central nervous system	1
ptgs2a	prostaglandin-endoperoxide synthase 2a	246227	6.72	2.32	also known as cyclooxygenase 2, is the key enzyme in prostaglandin biosynthesis during inflammation. Prostaglandins have a wide range of positive and negative immuno-modulatory effects on lymphoid and myeloid cells.	79
itgb3b	integrin beta 3b	100001836	3.78	2.09	Integrin critical for tumor invasion and inflammation and higly expressed in TAMs. Itgb3 influences M2 polarization in solid tumor	80,81,82
illr4	immune-related, lectin-like receptor 4	559737	7.56	1.97	Orthologous to human Mincle, macrophage-inducible C-type lectin (also called CLEC4E ) a pattern recognition receptor involved in the initiation of innate immyne response	83,84,85,86
ppp2r2bb	protein phosphatase 2, regulatory subunit B, beta b	558810	2.2	1.09	tumor suppressor, role in anti-tumor immune response, and expression associated with M1 infiltration	87
prg4a	proteoglycan 4a	336351	-2.43	1.33	Expressed in both murine and human macrophages. PRG4 plays key roles in tissue homeostasis, regeneration and immune modulation. It also has an anti-inflammatoy role through binding of TLRs and favors M2 macrophages	88,89,90,91
cxcl19	chemokine (C-X-C motif) ligand 19	100003911	-1.73	1.34	Orthologous to human CXCL3, CXCL8, CXCL1, and CXCL2. CXCL8 and CXCL1 have been shown to be secreted by TAMs and have pro-tumoral functions.	92,93,94,95,96
cd59	CD59 molecule (CD59 blood group)	567192	-2.46	2.49	GPI-anchored protein that suppresses complement-mediated inflammation, is up-regulated in TAMs with pro-tumoral functions and regulates schwann cell development in zebrafish	97.98
clic2	chloride intracellular channel 2	436834	-1.69	1	chloride intercellular channel, enriched in alternatively activated macrophages (IL-4 and IL-13 inducers)	99.1
apoeb	apolipoprotein Eb	30314	-2.8	-1.76	key component of several lipoproteins involved in lipid homeostasis and used as a microglia signature gene in zebrafish	101
ccl34b.1	chemokine (C-C motif) ligand 34b, duplicate 1	563952	-1.23	-1.68	chemokine used in zebrafish as a microglial subtype-specific marker	102
csf1rb	colony stimulating factor 1 receptor, b	568405	-4.33	-1.1	fundamental regulator of microglia ontogeny in vertebrates, including zebrafish	103
References
1. Biology | Free Full-Text | Molecular Actors of Inflammation and Their Signaling Pathways: Mechanistic Insights from Zebrafish https://www.mdpi.com/2079-7737/12/2/153. 2. Stein, C., Caccamo, M., Laird, G., and Leptin, M. (2007). Conservation and divergence of gene families encoding components of innate immune response systems in zebrafish. Genome Biol 8, R251. 10.1186/gb-2007-8-11-r251. 3. Jia,…
